# Supplementary material for: Oxidative cross-dehydrogenative coupling between iodoarenes and acylanilides for C–N bond formation under metal-free conditions
Source: Royal Society of Chemistry journal article supplement (doi:10.1039/d1qo00225b), 2021-01-01

# **Oxidative cross dehydrogenative coupling between iodoarenes and anilides for C–N bond formation under metal-free conditions**

Peng Yang,<sup>a</sup> Xia Wang,<sup>a</sup> Liang Wang,<sup>a</sup> Jiahua He,<sup>a</sup> Qian Zhang<sup>a</sup> and Dong Li<sup>\*a,b</sup>

<sup>a</sup>*School of Materials and Chemical Engineering, Hubei University of Technology, Wuhan 430068, China*

<sup>b</sup>*Hubei Key Laboratory of Drug Synthesis and Optimization, Jingchu University of Technology, Jingmen 448000, China*

## **Supplementary Information**

### **Contents**

|                                                               |                |
|---------------------------------------------------------------|----------------|
| <b>Experimental section</b>                                   | <b>S2</b>      |
| <b>Instrumentation and chemicals</b>                          | <b>S2</b>      |
| <b>Experimental procedures</b>                                | <b>S2</b>      |
| <b>Characterization Data</b>                                  | <b>S2–S8</b>   |
| <b>X-ray crystallography data</b>                             | <b>S9–S10</b>  |
| <b>Copies of <sup>1</sup>H and <sup>13</sup>C NMR spectra</b> | <b>S11–S47</b> |

## Experimental Section

### Instrumentation and chemicals.

<sup>1</sup>H NMR, <sup>13</sup>C NMR spectra were recorded on a Bruker DPX-400 spectrometer with CDCl<sub>3</sub> as the solvent and TMS as an internal standard, operating at 400 MHz for <sup>1</sup>H NMR and 100 MHz for <sup>13</sup>C NMR. Melting points were measured by SGW X-4A microscopic apparatus. The X-ray crystallography was measured on Bruker D8 Venture Photon instrument. HRMS was measured by Q Exactive Hybrid Quadrupole-Orbitrap LC/MS spectrometer.

Ethyl acetate and petroleum ether were used for column chromatography without further purification. Other chemicals were obtained from commercial sources and used as received unless otherwise noted.

### Experimental procedures

**General procedure for the oxidative cross dehydrogenative coupling between iodoarenes and anilides.** A mixture of iodoarenes (**1**, 0.3 mmol), anilides (**2**, 0.2 mmol), *m*-CPBA (0.3 mmol) were added into a vial containing a stirring bar and sealed with a Teflon-lined cap. Then HFIP (1 mL) was introduced. The resulting mixture was stirred at 60 °C for 8 h. After reaction, the mixture was added into H<sub>2</sub>O (25 mL) and extracted with ethyl acetate (10 mL) for three times. The combined organic layer was dried over anhydrous MgSO<sub>4</sub> and filtered. After removal of the solvent *in vacuo*, column chromatography (ethyl acetate/petroleum ether = 1:6) of the residue afforded the pure product.

**Procedure for the hydrolysis of 3aa to 4.** A mixture of **3aa** (0.2 mmol), saturated KOH aqueous solution (1 mL) and ethanol (1 mL) were added into a vial containing a stirring bar. The resulting mixture was stirred at 70 °C for 8 h. After reaction, the mixture was added into H<sub>2</sub>O (25 mL) and extracted with ethyl acetate (10 mL) for three times. The combined organic layer was dried over anhydrous MgSO<sub>4</sub> and filtered. After removal of the solvent *in vacuo*, column chromatography (ethyl acetate/petroleum ether=1:10) of the residue afforded the pure product.

**Procedure for the synthesis of 5 from 3aa.** A mixture of **3aa** (0.2 mmol), styrene (0.4 mmol), Pd(OAc)<sub>2</sub> (5 mol%), PPh<sub>3</sub> (10 mol%), Na<sub>2</sub>CO<sub>3</sub> (0.3 mmol) were added into a vial containing a stirring bar and sealed with a Teflon-lined cap. Then DMF (2 mL) was introduced. The resulting mixture was stirred at 100 °C for 4 h. After reaction, the mixture was added into H<sub>2</sub>O (25 mL) and extracted with ethyl acetate (10 mL) for three times. The combined organic layer was dried over anhydrous MgSO<sub>4</sub> and filtered. After removal of the solvent *in vacuo*, column chromatography (ethyl acetate/petroleum ether=1:6) of the residue afforded the pure product.

**Procedure for the synthesis of 6 from 3aa.** A mixture of **3aa** (0.2 mmol), phenylboronic acid (0.4 mmol), Pd(OAc)<sub>2</sub> (5 mol%), PPh<sub>3</sub> (10 mol%), K<sub>3</sub>PO<sub>4</sub> (0.5 mmol) were added into a vial containing a stirring bar and sealed with a Teflon-lined cap. Then toluene (2 mL) was introduced. The resulting mixture was stirred at 80 °C for 2 h. After reaction, the mixture was added into H<sub>2</sub>O (25 mL) and extracted with ethyl acetate (10 mL) for three times. The combined organic layer was dried over anhydrous MgSO<sub>4</sub> and filtered. After removal of the solvent *in vacuo*, column chromatography (ethyl acetate/petroleum ether=1:6) of the residue afforded the pure product

**Procedure for the synthesis of 7 from 3aa.** A mixture of **3aa** (0.2 mmol), phenylacetylene (0.3 mmol), PdCl<sub>2</sub> (5 mol%), pyrrolidine (1.0 mmol) were added into a vial containing a stirring bar and sealed with a Teflon-lined cap. Then H<sub>2</sub>O (2 mL) was introduced. The resulting mixture was stirred at room temperature for 24 h. After reaction, the

mixture was added into H<sub>2</sub>O (25 mL) and extracted with ethyl acetate (10 mL) for three times. The combined organic layer was dried over anhydrous MgSO<sub>4</sub> and filtered. After removal of the solvent *in vacuo*, column chromatography (ethyl acetate/petroleum ether=1:6) of the residue afforded the pure product.

### Characterization Data

#### ***N*-(4-iodophenyl)-*N*-phenylacetamide (3aa)<sup>1</sup>**

yellow solid, 56.6 mg, 84%, mp 88–90 °C; <sup>1</sup>H NMR (400 MHz, CDCl<sub>3</sub>): δ 2.05 (s, 3H), 7.00–7.03. (m, 2H), 7.24 (d, *J* = 7.42 Hz, 2H), 7.39 (s, 3H), 7.65 (s, 2H); <sup>13</sup>C NMR (100 MHz, CDCl<sub>3</sub>): δ 23.9, 90.7, 126.7, 128.2, 129.8, 137.7, 138.1, 142.6, 142.8, 170.4. HRMS–ESI(*m/z*): calcd for C<sub>14</sub>H<sub>13</sub>INO<sup>+</sup> (*M*+H<sup>+</sup>): 338.0036, found 338.0042.

#### ***N*-(4-iodo-3-methylphenyl)-*N*-phenylacetamide (3ba)**

yellow solid, 65.3 mg, 93%, mp 90–92 °C; <sup>1</sup>H NMR (400 MHz, CDCl<sub>3</sub>): δ 2.05 (s, 3H), 2.38 (s, 3H), 6.79 (d, *J* = 7.96 Hz, 1H), 7.16 (s, 1H), 7.24 (d, *J* = 8.20 Hz, 3H), 7.38 (s, 2H), 7.76 (s, 1H); <sup>13</sup>C NMR (100 MHz, CDCl<sub>3</sub>): δ 24.3, 28.2, 98.2, 125.7, 127.9, 129.6, 139.5, 139.8, 142.1, 142.5, 142.8, 143.1, 170.3. HRMS–ESI(*m/z*): calcd for C<sub>15</sub>H<sub>15</sub>INO<sup>+</sup> (*M*+H<sup>+</sup>): 352.0193, found 352.0201.

#### ***N*-(3-ethyl-4-iodophenyl)-*N*-phenylacetamide (3ca)**

yellow oil, 64.3 mg, 88%; <sup>1</sup>H NMR (400 MHz, CDCl<sub>3</sub>): δ 1.17 (t, *J* = 7.32 Hz, 3H), 2.06 (s, 3H), 2.67–2.69 (m, 2H), 6.80 (dd, *J*<sub>1</sub> = 2.48 Hz, *J*<sub>2</sub> = 8.36 Hz, 1H), 7.14 (d, *J* = 2.28 Hz, 1H), 7.25 (d, *J* = 7.72 Hz, 3H), 7.38 (s, 2H), 7.76 (s, 1H); <sup>13</sup>C NMR (100 MHz, CDCl<sub>3</sub>): δ 14.4, 23.9, 34.2, 97.2, 125.7, 126.4, 127.4, 128.4, 129.3, 129.8, 139.6, 143.2, 147.2, 170.4. HRMS–ESI(*m/z*): calcd for C<sub>16</sub>H<sub>17</sub>INO<sup>+</sup> (*M*+H<sup>+</sup>): 366.0349, found 366.0451.

#### ***N*-(4-iodo-3-isopropylphenyl)-*N*-phenylacetamide (3da)**

yellow oil, 60.7 mg, 80%; <sup>1</sup>H NMR (400 MHz, CDCl<sub>3</sub>): δ 1.18 (d, *J* = 6.24 Hz, 6H), 2.05 (s, 3H), 3.13–3.16 (m, 1H), 6.79 (dd, *J*<sub>1</sub> = 2.60 Hz, *J*<sub>2</sub> = 8.41 Hz, 1H), 7.16 (d, *J* = 2.52 Hz, 1H), 7.24–7.26 (m, 2H), 7.38 (s, 3H), 7.78 (s, 1H); <sup>13</sup>C NMR (100 MHz, CDCl<sub>3</sub>): δ 23.0, 23.9, 38.1, 97.5, 124.0, 125.6, 126.4, 127.6, 128.4, 129.5, 139.8, 140.6, 142.8, 170.4. HRMS–ESI(*m/z*): calcd for C<sub>17</sub>H<sub>19</sub>INO<sup>+</sup> (*M*+H<sup>+</sup>): 380.0506, found 380.0501.

#### ***N*-(6-iodo-[1,1'-biphenyl]-3-yl)-*N*-phenylacetamide (3ea)**

yellow oil, 33.1 mg, 40%; <sup>1</sup>H NMR (400 MHz, CDCl<sub>3</sub>): δ 2.07 (s, 3H), 6.99 (dd, *J* = 2.52 Hz, *J* = 8.44 Hz, 1H), 7.20 (d, *J* = 2.36 Hz, 1H), 7.25–7.31 (m, 5H), 7.38–7.40 (m, 5H), 7.91 (s, 1H); <sup>13</sup>C NMR (100 MHz, CDCl<sub>3</sub>): δ 23.9, 95.3, 126.7, 126.9, 127.4, 127.9, 128.0, 128.4, 128.9, 129.2, 129.8, 139.8, 140.1, 142.9, 143.4, 170.4. HRMS–ESI(*m/z*): calcd for C<sub>20</sub>H<sub>17</sub>INO<sup>+</sup> (*M*+H<sup>+</sup>): 414.0349, found 414.0352.

#### ***N*-(3-(bromomethyl)-4-iodophenyl)-*N*-phenylacetamide (3fa)**

yellow oil, 38.6 mg, 45%; <sup>1</sup>H NMR (400 MHz, CDCl<sub>3</sub>): δ 2.06 (s, 3H), 4.52 (s, 2H), 6.89 (dd, *J* = 2.55 Hz, *J* = 8.49 Hz, 1H), 7.25 (d, *J* = 8.98 Hz, 2H), 7.37–7.46 (m, 4H), 7.79 (s, 1H); <sup>13</sup>C NMR (100 MHz, CDCl<sub>3</sub>): δ 24.0, 38.3, 96.1, 127.9, 128.3, 128.9, 129.9, 131.0, 132.8, 140.4, 142.5, 143.5, 170.4. HRMS–ESI(*m/z*): calcd for C<sub>15</sub>H<sub>14</sub>BrINO<sup>+</sup> (*M*+H<sup>+</sup>): 429.9298, found 429.9295.

***N*-(4-iodo-3-(methoxymethyl)phenyl)-*N*-phenylacetamide (3ga)**

yellow oil, 48 mg, 63%; <sup>1</sup>H NMR (400 MHz, CDCl<sub>3</sub>): δ 2.06 (s, 3H), 3.44 (s, 3H), 4.38 (s, 2H), 6.91 (dd, *J*<sub>1</sub> = 2.51 Hz, *J*<sub>2</sub> = 8.35 Hz 1H), 7.25 (d, *J* = 8.03 Hz, 2H), 7.36–7.37 (m, 4H), 7.77 (s, 1H); <sup>13</sup>C NMR (100 MHz, CDCl<sub>3</sub>): δ 23.9, 58.7, 78.0, 93.8, 126.6, 127.0, 128.1, 128.5, 128.9, 129.4, 139.6, 141.3, 142.9, 170.4. HRMS–ESI(*m/z*): calcd for C<sub>16</sub>H<sub>17</sub>INO<sub>2</sub><sup>+</sup> (*M*+H<sup>+</sup>): 382.0298, found 382.0296.

**2-iodo-5-(*N*-phenylacetamido)benzyl acetate (3ha)**

yellow oil, 49.9 mg, 61%; <sup>1</sup>H NMR (400 MHz, CDCl<sub>3</sub>): δ 2.07 (s, 3H), 2.11 (s, 3H), 5.05 (s, 2H), 6.95 (dd, *J*<sub>1</sub> = 2.62 Hz, *J*<sub>2</sub> = 8.43 Hz, 1H), 7.21–7.26 (m, 2H), 7.30–7.41 (m, 4H), 7.80 (s, 1H); <sup>13</sup>C NMR (100 MHz, CDCl<sub>3</sub>): δ 20.9, 24.0, 69.9, 94.5, 119.8, 124.1, 127.5, 128.4, 128.9, 139.9, 142.6, 143.2, 144.8, 170.5. HRMS–ESI(*m/z*): calcd for C<sub>17</sub>H<sub>17</sub>INO<sub>3</sub><sup>+</sup> (*M*+H<sup>+</sup>): 410.0248, found 410.0251.

***N*-(4-iodo-3, 5-dimethylphenyl)-*N*-phenylacetamide (3ia)**

yellow oil, 46 mg, 63%; <sup>1</sup>H NMR (400 MHz, CDCl<sub>3</sub>): δ 2.05 (s, 3H), 2.43 (s, 6H), 6.98 (s, 2H), 7.25–7.27 (m, 3H), 7.37 (s, 2H); <sup>13</sup>C NMR (100 MHz, CDCl<sub>3</sub>): δ 23.8, 29.7, 125.1, 126.6, 127.5, 128.6, 129.7, 138.9, 142.9, 170.4. HRMS–ESI(*m/z*): calcd for C<sub>16</sub>H<sub>17</sub>INO<sup>+</sup> (*M*+H<sup>+</sup>): 366.0349, found 366.0345.

***N*-(3-ethyl-4-iodo-5-methylphenyl)-*N*-phenylacetamide (3ja)**

yellow oil, 45.5 mg, 60%; <sup>1</sup>H NMR (400 MHz, CDCl<sub>3</sub>): δ 1.18 (t, *J* = 7.2 Hz, 3H), 2.06 (s, 3H), 2.44 (s, 3H), 2.75–2.88 (m, 2H), 6.95–6.99 (m, 2H), 7.25–7.37 (m, 5H); <sup>13</sup>C NMR (100 MHz, CDCl<sub>3</sub>): δ 14.4, 23.8, 30.0, 35.3, 123.8, 125.3, 126.2, 126.7, 127.9, 128.6, 129.7, 142.9, 147.7, 170.5. HRMS–ESI(*m/z*): calcd for C<sub>17</sub>H<sub>19</sub>INO<sup>+</sup> (*M*+H<sup>+</sup>): 380.0506, found 380.0510.

***N*-(4-fluorophenyl)-*N*-(4-iodo-2-methylphenyl)acetamide (3kb)**

yellow oil, 58.8 mg, 80%; <sup>1</sup>H NMR (400 MHz, CDCl<sub>3</sub>): δ 1.96 (s, 3H), 2.16 (s, 3H), 6.97–7.08 (m, 3H), 7.20–7.23 (m, 2H), 7.63–7.67 (m, 2H); <sup>13</sup>C NMR (100 MHz, CDCl<sub>3</sub>): δ 17.6, 23.7, 94.2, 115.5 (d, *J* = 22.77 Hz), 126.8 (d, *J* = 8.12 Hz), 129.1, 131.3, 136.7, 138.5, 140.9, 141.4, 160.1 (d, *J* = 244.69 Hz), 170.1. HRMS–ESI(*m/z*): calcd for C<sub>15</sub>H<sub>14</sub>FINO<sup>+</sup> (*M*+H<sup>+</sup>): 370.0099, found 370.0102.

***N*-(4-fluorophenyl)-*N*-(4-iodo-2, 6-dimethylphenyl)acetamide (3lb)<sup>2</sup>**

yellow oil, 62.8 mg, 82%; <sup>1</sup>H NMR (400 MHz, CDCl<sub>3</sub>): δ 1.90 (s, 3H), 2.16 (s, 6H), 6.94–6.99 (m, 2H), 7.21–7.24 (m, 2H), 7.55 (s, 2H); <sup>13</sup>C NMR (100 MHz, CDCl<sub>3</sub>): δ 17.7, 23.6, 94.4, 115.3 (d, *J* = 22.50 Hz), 124.9 (d, *J* = 8.07 Hz), 136.1 (d, *J* = 2.96 Hz), 138.3, 138.8, 140.2, 159.5 (d, *J* = 245.23 Hz), 170.0. HRMS–ESI(*m/z*): calcd for C<sub>16</sub>H<sub>16</sub>FINO<sup>+</sup> (*M*+H<sup>+</sup>): 384.0255, found 384.0251.

***N*-(4-fluorophenyl)-*N*-(4-iodo-2, 3-dimethylphenyl)acetamide (3mb)**

yellow oil, 65.1 mg, 85%; <sup>1</sup>H NMR (400 MHz, CDCl<sub>3</sub>): δ 1.95 (s, 3H), 2.26 (s, 3H), 2.48 (s, 3H), 6.85 (d, *J* = 8.26 Hz, 1H), 6.96–7.09 (m, 2H), 7.21–7.25 (m, 2H), 7.79 (d, *J* = 8.27 Hz, 1H); <sup>13</sup>C NMR (100 MHz, CDCl<sub>3</sub>): δ 16.3, 23.9, 26.2, 102.4, 115.5 (d, *J* = 22.55 Hz), 126.7 (d, *J* = 8.15 Hz), 128.4, 135.9, 137.9, 141.9, 142.2, 160.0 (d, *J* = 245.74

Hz), 170.4. HRMS–ESI(m/z): calcd for C<sub>16</sub>H<sub>16</sub>FINO<sup>+</sup> (M+H<sup>+</sup>): 384.0255, found 384.0253.

***N*-(4-fluorophenyl)-*N*-(4-iodo-3-methylphenyl)acetamide (3bb)**

yellow oil, 66.4 mg, 90%; <sup>1</sup>H NMR (400 MHz, CDCl<sub>3</sub>): δ 2.05 (s, 3H), 2.40 (s, 3H), 6.78 (d, *J* = 7.48 Hz, 1H), 7.07 (s, 2H), 7.13 (d, *J* = 2.04 Hz, 1H), 7.21–7.24 (m, 2H), 7.79 (s, 1H); <sup>13</sup>C NMR (100 MHz, CDCl<sub>3</sub>): δ 23.6, 28.2, 99.9, 116.1, 116.8, 125.4, 127.6, 128.2, 129.4, 130.1, 139.6, 142.9, 170.4. HRMS–ESI(m/z): calcd for C<sub>15</sub>H<sub>14</sub>FINO<sup>+</sup> (M+H<sup>+</sup>): 370.0099, found 370.0104.

***N*-(4-chlorophenyl)-*N*-(4-iodo-3-methylphenyl)acetamide (3bc)**

yellow oil, 75.5 mg, 98%; <sup>1</sup>H NMR (400 MHz, CDCl<sub>3</sub>): δ 2.05(s, 3H), 2.40 (s, 3H), 6.78 (d, *J* = 7.44 Hz, 1H), 7.12 (d, *J* = 2.12 Hz, 1H), 7.18 (d, *J* = 8.56 Hz, 2H), 7.33 (s, 2H), 7.80 (s, 1H); <sup>13</sup>C NMR (100 MHz, CDCl<sub>3</sub>): δ 23.8, 28.2, 97.7, 125.5, 127.4, 127.7, 128.9, 129.4, 139.6, 139.9, 141.0, 142.8, 170.2. HRMS–ESI(m/z): calcd for C<sub>15</sub>H<sub>14</sub>ClINO<sup>+</sup> (M+H<sup>+</sup>): 385.9803, found 385.9805.

***N*-(4-bromophenyl)-*N*-(4-iodo-3-methylphenyl)acetamide (3bd)**

yellow oil, 81.5 mg, 95%; <sup>1</sup>H NMR (400 MHz, CDCl<sub>3</sub>): δ 2.05(s, 3H), 2.40 (s, 3H), 6.77 (d, *J* = 7.44 Hz, 1H), 7.11–7.13 (m, 3H), 7.48 (s, 2H), 7.80 (s, 1H); <sup>13</sup>C NMR (100 MHz, CDCl<sub>3</sub>): δ 23.8, 28.2, 98.7, 120.0, 125.6, 128.0, 132.4, 140.0, 140.0, 141.7, 142.8, 170.1. HRMS–ESI(m/z): calcd for C<sub>15</sub>H<sub>14</sub>BrINO<sup>+</sup> (M+H<sup>+</sup>): 429.9298, found 429.9302.

**methyl 4-(*N*-(4-iodo-3-methylphenyl)acetamido)benzoate (3be)**

yellow oil, 50.7 mg, 62%; <sup>1</sup>H NMR (400 MHz, CDCl<sub>3</sub>): δ 2.08 (s, 3H), 2.41 (s, 3H), 3.91 (s, 3H), 6.79 (dd, *J*<sub>1</sub> = 2.25 Hz, *J*<sub>2</sub> = 8.29 Hz, 1H), 7.13 (d, *J* = 2.38 Hz, 1H), 7.29–7.33 (m, 2H), 7.83 (d, *J* = 8.02 Hz, 1H), 8.02 (d, *J* = 8.15 Hz, 2H); <sup>13</sup>C NMR (100 MHz, CDCl<sub>3</sub>): δ 24.1, 28.2, 52.3, 99.9, 126.9, 128.0, 128.9, 129.1, 130.7, 140.0, 142.7, 146.6, 166.3, 170.1. HRMS–ESI(m/z): calcd for C<sub>17</sub>H<sub>17</sub>INO<sub>3</sub><sup>+</sup> (M+H<sup>+</sup>): 410.0248, found 410.0253.

***N*-(2-chlorophenyl)-*N*-(4-iodo-3-methylphenyl)acetamide (3bf)**

yellow oil, 71.6 mg, 93%; <sup>1</sup>H NMR (400 MHz, CDCl<sub>3</sub>): δ 2.00 (s, 3H), 2.38 (s, 3H), 6.86 (s, 1H), 7.24 (d, *J* = 2.33 Hz, 2H), 7.34 (s, 2H), 7.51 (s, 1H), 7.72–7.74 (m, 1H); <sup>13</sup>C NMR (100 MHz, CDCl<sub>3</sub>): δ 23.0, 23.9, 38.1, 97.5, 124.0, 125.6, 126.4, 127.6, 128.4, 129.5, 139.8, 140.6, 142.8, 170.4. HRMS–ESI(m/z): calcd for C<sub>15</sub>H<sub>14</sub>ClINO<sup>+</sup> (M+H<sup>+</sup>): 385.9803, found 385.9808.

***N*-(2-bromophenyl)-*N*-(4-iodo-3-methylphenyl)acetamide (3bg)**

yellow oil, 78.1 mg, 91%; <sup>1</sup>H NMR (400 MHz, CDCl<sub>3</sub>): δ 2.00 (s, 3H), 2.37 (s, 3H), 6.87 (s, 1H), 7.26–7.40 (m, 4H), 7.69–7.79 (m, 2H); <sup>13</sup>C NMR (100 MHz, CDCl<sub>3</sub>): δ 23.8, 28.3, 97.8, 124.3, 124.8, 127.0, 129.2, 130.2, 131.1, 134.4, 139.0, 141.4, 141.7, 141.9, 170.1. HRMS–ESI(m/z): calcd for C<sub>15</sub>H<sub>14</sub>BrINO<sup>+</sup> (M+H<sup>+</sup>): 429.9298, found 429.9295.

***N*-(3-chlorophenyl)-*N*-(4-iodo-3-methylphenyl)acetamide (3bh)**

yellow oil, 54.6 mg, 71%; <sup>1</sup>H NMR (400 MHz, CDCl<sub>3</sub>): δ 2.07 (s, 3H), 2.41 (s, 3H), 6.78 (d, *J* = 7.39 Hz, 1H), 7.12–7.16 (m, 2H), 7.24–7.29 (m, 3H), 7.82 (s, 1H); <sup>13</sup>C NMR (100 MHz, CDCl<sub>3</sub>): δ 23.8, 28.2, 100.0, 124.6, 125.4, 126.7, 128.4, 129.3, 130.2, 134.9, 138.8, 140.0, 142.8, 143.8, 170.2. HRMS–ESI(m/z): calcd for C<sub>15</sub>H<sub>14</sub>ClINO<sup>+</sup> (M+H<sup>+</sup>):

385.9803, found 385.9808.

***N*-(3-chloro-4-methylphenyl)-*N*-(4-iodo-3-methylphenyl)acetamide (3bi)**

yellow oil, 65.4 mg, 82%; <sup>1</sup>H NMR (400 MHz, CDCl<sub>3</sub>): δ 2.06 (s, 3H), 2.38 (d, *J* = 15.66 Hz, 6H), 6.78 (d, *J* = 7.14 Hz, 1H), 7.05–7.07 (m, 1H), 7.13 (d, *J* = 2.12 Hz, 1H), 7.24 (d, *J* = 1.88 Hz, 2H), 7.78 (s, 1H); <sup>13</sup>C NMR (100 MHz, CDCl<sub>3</sub>): δ 19.7, 23.8, 28.2, 98.1, 124.8, 125.5, 127.1, 128.9, 131.8, 134.4, 136.1, 139.4, 140.0, 141.4, 142.8, 170.2. HRMS–ESI(*m/z*): calcd for C<sub>16</sub>H<sub>16</sub>ClINO<sup>+</sup> (*M*+H<sup>+</sup>): 399.9960, found 399.9954.

***N*-(3-cyano-4-methylphenyl)-*N*-(4-iodo-3-methylphenyl)acetamide (3bj)**

yellow oil, 54.6 mg, 70%; <sup>1</sup>H NMR (400 MHz, CDCl<sub>3</sub>): δ 2.06 (s, 3H), 2.43 (s, 3H), 2.52 (s, 3H), 6.79 (d, *J* = 7.16 Hz, 1H), 7.12 (d, *J* = 2.38 Hz, 1H), 7.30 (s, 1H), 7.41 (dd, *J*<sub>1</sub> = 2.31 Hz, *J*<sub>2</sub> = 8.27 Hz, 1H), 7.46 (s, 1H), 7.86 (s, 1H); <sup>13</sup>C NMR (100 MHz, CDCl<sub>3</sub>): δ 20.1, 23.8, 28.3, 100.7, 113.4, 117.4, 127.3, 128.1, 129.6, 130.5, 131.0, 139.7, 140.2, 140.4, 142.5, 143.8, 170.2. HRMS–ESI(*m/z*): calcd for C<sub>17</sub>H<sub>16</sub>IN<sub>2</sub>O<sup>+</sup> (*M*+H<sup>+</sup>): 391.0302, found 391.0305.

***N*-(4-iodo-3-methylphenyl)-*N*-phenylpropionamide (3bk)**

yellow solid, 64.2 mg, 88%, mp 95–96 °C; <sup>1</sup>H NMR (400 MHz, CDCl<sub>3</sub>): δ 1.12 (t, *J* = 7.42 Hz, 3H), 2.27 (q, *J* = 7.40 Hz, 2H), 2.38 (s, 3H), 6.78 (dd, *J*<sub>1</sub> = 8.29 Hz, *J*<sub>2</sub> = 1.96 Hz, 1H), 7.16 (d, *J* = 2.16 Hz, 1H), 7.25–7.26 (m, 2H), 7.35–7.38 (m, 3H), 7.75 (d, *J* = 6.96 Hz, 1H); <sup>13</sup>C NMR (100 MHz, CDCl<sub>3</sub>): δ 9.7, 28.2, 28.8, 97.8, 126.0, 127.5, 128.2, 128.9, 129.6, 139.4, 139.5, 142.6, 143.1, 173.9. HRMS–ESI(*m/z*): calcd for C<sub>16</sub>H<sub>17</sub>INO<sup>+</sup> (*M*+H<sup>+</sup>): 366.0349, found 366.0351.

***N*-(4-iodo-3-methylphenyl)-*N*-phenylbutyramide (3bl)**

yellow oil, 70.5 mg, 93%; <sup>1</sup>H NMR (400 MHz, CDCl<sub>3</sub>): δ 0.89 (t, *J* = 7.40 Hz, 3H), 1.63–1.72 (m, 2H), 2.22 (t, *J* = 7.41 Hz, 2H), 2.38 (s, 3H), 6.76–6.79 (m, 1H), 7.15 (d, *J* = 2.08 Hz, 1H), 7.22–7.24 (m, 2H), 7.38 (s, 3H), 7.75 (d, *J* = 4.5 Hz, 1H); <sup>13</sup>C NMR (100 MHz, CDCl<sub>3</sub>): δ 13.8, 19.0, 28.2, 37.2, 97.8, 126.6, 127.4, 127.7, 129.5, 139.4, 139.5, 141.7, 142.6, 143.2, 173.1. HRMS–ESI(*m/z*): calcd for C<sub>17</sub>H<sub>19</sub>INO<sup>+</sup> (*M*+H<sup>+</sup>): 380.0506, found 380.0511.

***N*-(4-iodo-3-methylphenyl)-*N*-phenylisobutyramide (3bm)**

yellow oil, 38.2 mg, 90%; <sup>1</sup>H NMR (400 MHz, CDCl<sub>3</sub>): δ 1.05 (d, *J* = 6.72 Hz, 6H), 2.31 (s, 3H), 2.56–2.66 (m, 1H), 6.68 (d, *J* = 7.16 Hz, 1H), 7.06 (d, *J* = 2.48 Hz, 1H), 7.14–7.18 (m, 3H), 7.30 (s, 2H), 7.68 (d, *J* = 5.4 Hz, 1H); <sup>13</sup>C NMR (100 MHz, CDCl<sub>3</sub>): δ 18.6, 27.1, 31.0, 97.7, 124.9, 126.2, 127.2, 128.5, 138.4, 138.5, 140.4, 141.6, 142.2, 176.5. HRMS–ESI(*m/z*): calcd for C<sub>17</sub>H<sub>19</sub>INO<sup>+</sup> (*M*+H<sup>+</sup>): 380.0506, found 380.0502.

***N*-(4-iodo-3-methylphenyl)-*N*-phenylcyclopropanecarboxamide (3bn)**

yellow oil, 66.4 mg, 88%; <sup>1</sup>H NMR (400 MHz, CDCl<sub>3</sub>): δ 0.72–0.76 (m, 2H), 1.11–1.14 (m, 2H), 1.49–1.55 (m, 1H), 2.38 (s, 3H), 6.80 (s, 1H), 7.17 (s, 1H), 7.25–7.28 (m, 3H), 7.35–7.38 (m, 2H), 7.76 (d, *J* = 7.32 Hz, 1H); <sup>13</sup>C NMR (100 MHz, CDCl<sub>3</sub>): δ 9.5, 13.9, 28.2, 97.9, 125.9, 127.1, 128.2, 129.4, 139.4, 139.5, 141.6, 142.7, 143.3, 173.7. HRMS–ESI(*m/z*): calcd for C<sub>17</sub>H<sub>17</sub>INO<sup>+</sup> (*M*+H<sup>+</sup>): 378.0349, found 378.0351.

***N*-(4-iodo-3-methylphenyl)-*N*-phenylcyclohexanecarboxamide (3bo)**

yellow solid, 72.1 mg, 86%, mp 140–145 °C;  $^1\text{H}$  NMR (400 MHz,  $\text{CDCl}_3$ ):  $\delta$  0.98–1.07 (m, 2H), 1.16–1.29 (m, 2H), 1.55–1.65 (m, 3H), 1.69–1.80 (m, 4H), 2.37 (s, 3H), 6.74 (d,  $J = 7.2$  Hz, 1H), 7.11 (d,  $J = 2.44$  Hz, 1H), 7.21 (d,  $J = 7.52$  Hz, 3H), 7.37 (s, 2H), 7.76 (d,  $J = 3.72$  Hz, 1H);  $^{13}\text{C}$  NMR (100 MHz,  $\text{CDCl}_3$ ):  $\delta$  25.5, 25.6, 28.2, 29.5, 42.3, 97.7, 126.0, 126.9, 128.0, 129.6, 139.4, 141.5, 142.7, 143.3, 176.6. HRMS–ESI( $m/z$ ): calcd for  $\text{C}_{20}\text{H}_{23}\text{INO}^+$  ( $\text{M}+\text{H}^+$ ): 420.0819, found 420.0814.

#### ***N*-(4-iodo-3-methylphenyl)-*N*-phenylbenzamide (3bp)**

yellow oil, 50.4 mg, 61%;  $^1\text{H}$  NMR (400 MHz,  $\text{CDCl}_3$ ):  $\delta$  2.33 (s, 3H), 6.68 (dd,  $J = 8.37$  Hz,  $J = 2.44$  Hz, 1H), 7.06–7.10 (m, 3H), 7.15–7.31 (m, 6H), 7.43–7.45 (m, 2H), 7.40 (d,  $J = 8.44$  Hz, 1H);  $^{13}\text{C}$  NMR (100 MHz,  $\text{CDCl}_3$ ):  $\delta$  28.2, 98.1, 126.4, 126.6, 127.6, 128.0, 128.4, 129.2, 129.3, 130.4, 135.8, 139.4, 142.5, 143.6, 144.1, 170.6. HRMS–ESI( $m/z$ ): calcd for  $\text{C}_{20}\text{H}_{17}\text{INO}^+$  ( $\text{M}+\text{H}^+$ ): 414.0349, found 414.0352.

#### ***N*-(4-iodo-3-methylphenyl)-*N*-phenylacrylamide (3bq)**

yellow solid, 60.3 mg, 83%, mp 90–92 °C;  $^1\text{H}$  NMR (400 MHz,  $\text{CDCl}_3$ ):  $\delta$  2.31 (s, 3H), 5.57 (dd,  $J = 10.27$  Hz,  $J = 1.88$  Hz, 1H), 6.10 (dd,  $J = 16.76$  Hz,  $J = 10.24$  Hz, 1H), 6.39 (dd,  $J = 16.77$  Hz,  $J = 1.92$  Hz, 1H), 6.68 (dd,  $J = 8.38$  Hz,  $J = 2.56$  Hz, 1H), 7.06 (s, 1H), 7.12–7.14 (m, 2H), 7.18–7.23 (m, 1H), 7.28–7.32 (m, 2H), 7.69 (d,  $J = 8.32$  Hz, 1H);  $^{13}\text{C}$  NMR (100 MHz,  $\text{CDCl}_3$ ):  $\delta$  27.1, 97.7, 125.6, 126.3, 126.4, 127.7, 128.2, 128.3, 128.4, 138.5, 141.0, 141.5, 141.7, 164.5. HRMS–ESI( $m/z$ ): calcd for  $\text{C}_{16}\text{H}_{15}\text{INO}^+$  ( $\text{M}+\text{H}^+$ ): 364.0193, found 364.0190.

#### ***N*-(4-iodo-3-methylphenyl)-*N*-phenylbut-3-enamide (3br)**

yellow solid, 66.4 mg, 88%, mp 92–95 °C;  $^1\text{H}$  NMR (400 MHz,  $\text{CDCl}_3$ ):  $\delta$  2.38 (s, 3H), 3.06 (d,  $J = 6.68$  Hz, 2H), 5.01 (dd,  $J = 17.18$  Hz,  $J = 1.24$  Hz, 1H), 5.12 (dd,  $J = 10.19$  Hz,  $J = 1.40$  Hz, 1H), 5.91–6.01 (m, 1H), 6.78 (d,  $J = 7.48$  Hz, 1H), 7.17 (d,  $J = 2.2$  Hz, 1H), 7.23–7.25 (m, 3H), 7.36–7.38 (m, 2H), 7.72–7.76 (m, 1H);  $^{13}\text{C}$  NMR (100 MHz,  $\text{CDCl}_3$ ):  $\delta$  28.2, 40.3, 97.8, 118.1, 123.6, 125.6, 128.1, 129.4, 129.5, 131.6, 139.6, 141.1, 142.3, 142.9, 170.1. HRMS–ESI( $m/z$ ): calcd for  $\text{C}_{17}\text{H}_{17}\text{INO}^+$  ( $\text{M}+\text{H}^+$ ): 378.0349, found 378.0345.

#### ***N*-(4-iodo-3-methylphenyl)-*N*-phenylcinnamamide (3bs)**

yellow solid, 58.8 mg, 67%, mp 150–152 °C;  $^1\text{H}$  NMR (400 MHz,  $\text{CDCl}_3$ ):  $\delta$  2.39 (s, 3H), 6.46 (d,  $J = 15.48$  Hz, 1H), 6.80 (dd,  $J = 8.35$  Hz,  $J = 2.32$  Hz, 1H), 7.17 (s, 1H), 7.24–7.76 (m, 2H), 7.31–7.41 (m, 8H), 7.75–7.79 (m, 2H);  $^{13}\text{C}$  NMR (100 MHz,  $\text{CDCl}_3$ ):  $\delta$  28.3, 98.6, 119.3, 119.4, 126.9, 128.1, 128.3, 128.5, 128.8, 128.9, 129.5, 129.8, 129.9, 134.9, 139.5, 142.4, 143.0, 143.1, 166.1. HRMS–ESI( $m/z$ ): calcd for  $\text{C}_{22}\text{H}_{19}\text{INO}^+$  ( $\text{M}+\text{H}^+$ ): 440.0506, found 440.0509.

#### **4-iodo-*N*-phenylaniline (4)<sup>3</sup>**

white solid, 56.1 mg, 95%, mp 100–102 °C;  $^1\text{H}$  NMR (400 MHz,  $\text{CDCl}_3$ ):  $\delta$  5.67 (s, 1H), 6.80–6.83 (m, 2H), 6.95–6.99 (m, 1H), 7.04–7.06 (m, 2H), 7.24–7.30 (m, 2H), 7.49–7.52 (m, 2H);  $^{13}\text{C}$  NMR (100 MHz,  $\text{CDCl}_3$ ):  $\delta$  82.1, 118.5, 119.3, 121.8, 129.5, 138.1, 142.2, 143.1. HRMS–ESI( $m/z$ ): calcd for  $\text{C}_{12}\text{H}_{11}\text{IN}^+$  ( $\text{M}+\text{H}^+$ ): 295.9931, found 295.9926.

#### **(*E*)-*N*-phenyl-*N*-(4-styrylphenyl)acetamide (5)**

white solid, 50.7 mg, 81%, mp 120–122 °C;  $^1\text{H}$  NMR (400 MHz,  $\text{CDCl}_3$ ):  $\delta$  2.08 (s, 3H), 7.07 (s, 2H), 7.24–7.28 (m,

6H), 7.35 (t,  $J = 7.28$  Hz, 4H), 7.50 (d,  $J = 7.32$  Hz, 4H);  $^{13}\text{C}$  NMR (100 MHz,  $\text{CDCl}_3$ ):  $\delta$  24.0, 126.6, 127.0, 127.3, 127.8, 128.6, 128.8, 129.1, 129.9, 135.1, 137.1, 142.1, 142.5, 143.3, 170.6. HRMS–ESI( $m/z$ ): calcd for  $\text{C}_{22}\text{H}_{20}\text{NO}^+$  ( $\text{M}+\text{H}^+$ ): 314.1539, found 314.1535.

#### ***N*-([1,1'-biphenyl]-4-yl)-*N*-phenylacetamide (6)<sup>4</sup>**

white solid, 47.7 mg, 83%, mp 120–122 °C;  $^1\text{H}$  NMR (400 MHz,  $\text{CDCl}_3$ ):  $\delta$  2.10 (s, 3H), 7.25 (s, 1H), 7.30–7.35 (m, 6H), 7.40–7.43 (m, 3H), 7.55 (d,  $J = 6.72$  Hz, 4H);  $^{13}\text{C}$  NMR (100 MHz,  $\text{CDCl}_3$ ):  $\delta$  24.0, 126.6, 127.1, 127.4, 127.7, 127.8, 128.6, 128.9, 129.8, 140.4, 140.8, 141.9, 142.6, 170.6. HRMS–ESI( $m/z$ ): calcd for  $\text{C}_{20}\text{H}_{18}\text{NO}^+$  ( $\text{M}+\text{H}^+$ ): 288.1383, found 288.1385.

#### ***N*-phenyl-*N*-(4-(phenylethynyl)phenyl)acetamide (7)**

yellow oil, 56.6 mg, 91%;  $^1\text{H}$  NMR (400 MHz,  $\text{CDCl}_3$ ):  $\delta$  2.07 (s, 3H), 7.20–7.26 (m, 4H), 7.33–7.41 (m, 6H), 7.50–7.53 (m, 4H);  $^{13}\text{C}$  NMR (100 MHz,  $\text{CDCl}_3$ ):  $\delta$  24.1, 88.7, 123.0, 126.0, 126.5, 128.4, 128.5, 128.6, 129.7, 129.9, 131.6, 131.7, 132.2, 142.8, 170.5. HRMS–ESI( $m/z$ ): calcd for  $\text{C}_{22}\text{H}_{18}\text{NO}^+$  ( $\text{M}+\text{H}^+$ ): 312.1383, found 312.1386.

#### **References**

1. (a) N. Itoh, T. Sakamoto, E. Miyazawa and Y. Kikugawa, *J. Org. Chem.*, 2002, **67**, 7424. (b) C. He, C. Chen, J. Cheng, C. Liu, W. Liu, Q. Li and A. Lei, *Angew. Chem. Int. Ed.*, 2008, **47**, 6414.
2. A. P. Antonchick, R. Samanta, K. Kulikov and J. Lategahn, *Angew. Chem. Int. Ed.*, 2011, **50**, 8605.
3. Q. Yang, Xi. Lei, Z. Yin, Z. Deng and Y. Peng, *Synthesis*, 2019, **51**, 538.
4. P. E. Maligres, S. W. Krska and P. G. Dormer, *J. Org. Chem.*, 2012, **77**, 7646.



## X-ray crystallography data

Crystals of **3aa** were obtained by recrystallization from CH<sub>2</sub>Cl<sub>2</sub>/hexane (1:8). The X-ray crystallography was measured on Bruker D8 Venture Photon instrument.

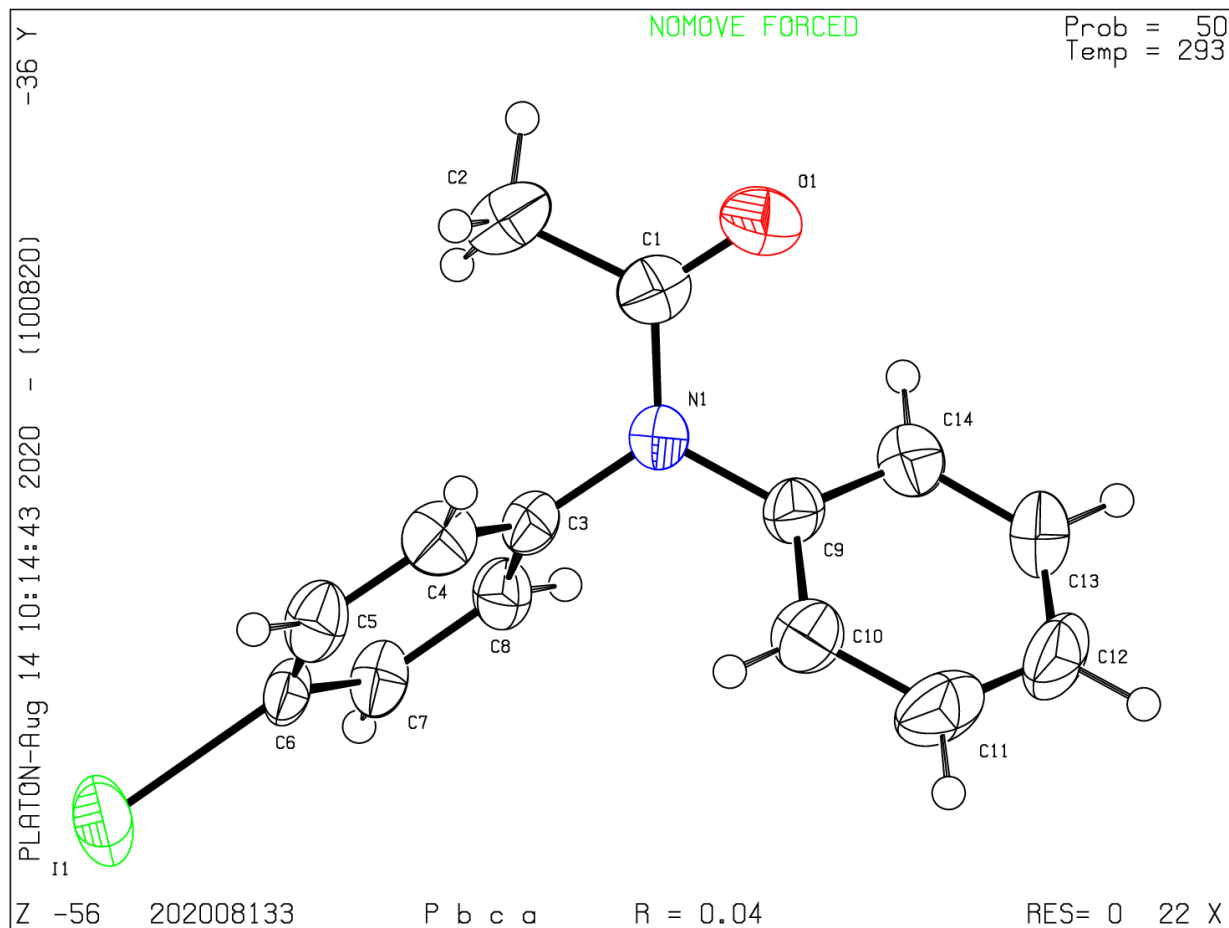

Figure 1. X-ray crystallography of **3aa**. Thermal ellipsoids are drawn at the 50% probability level.

---

Bond precision: C-C = 0.0078 Å                      Wavelength=1.54184

Cell:                      a=13.8944(4)              b=8.9694(2)              c=20.9762(6)  
                               alpha=90                      beta=90                      gamma=90

Temperature:              293 K

|                | Calculated    | Reported      |
|----------------|---------------|---------------|
| Volume         | 2614.15(12)   | 2614.14(12)   |
| Space group    | P b c a       | P b c a       |
| Hall group     | -P 2ac 2ab    | -P 2ac 2ab    |
| Moiety formula | C14 H12 I N O | C14 H12 I N O |
| Sum formula    | C14 H12 I N O | C14 H12 I N O |
| Mr             | 337.15        | 337.15        |
| Dx,g cm-3      | 1.713         | 1.713         |
| Z              | 8             | 8             |
| Mu (mm-1)      | 19.109        | 19.109        |
| F000           | 1312.0        | 1312.0        |
| F000'          | 1313.13       |               |
| h,k,lmax       | 16,10,25      | 16,10,25      |
| Nref           | 2326          | 2327          |
| Tmin,Tmax      | 0.096,0.148   | 0.433,1.000   |
| Tmin'          | 0.020         |               |

Correction method= # Reported T Limits: Tmin=0.433 Tmax=1.000  
 AbsCorr = MULTI-SCAN

Data completeness= 1.000                      Theta(max)= 67.065

R(reflections)= 0.0428( 1761)              wR2(reflections)= 0.1311( 2327)

S = 1.028                                      Npar= 155

---

# Copies of $^1\text{H}$ and $^{13}\text{C}$ NMR spectra

## N-(4-iodophenyl)-N-phenylacetamide(3aa)

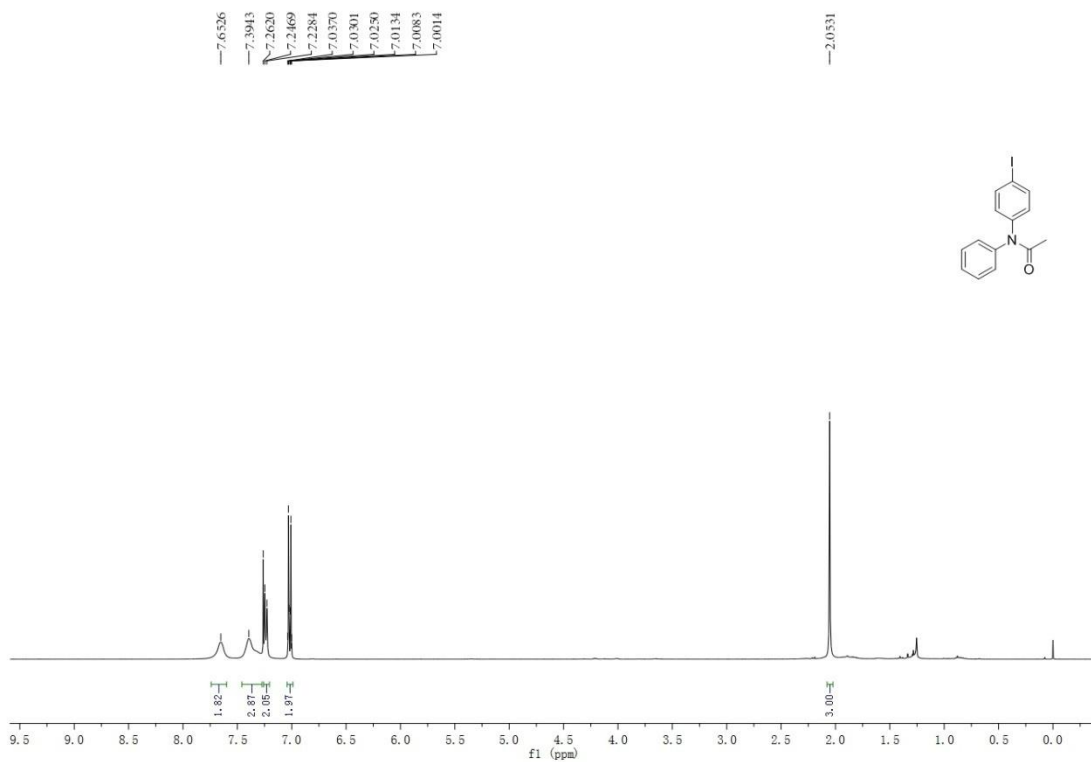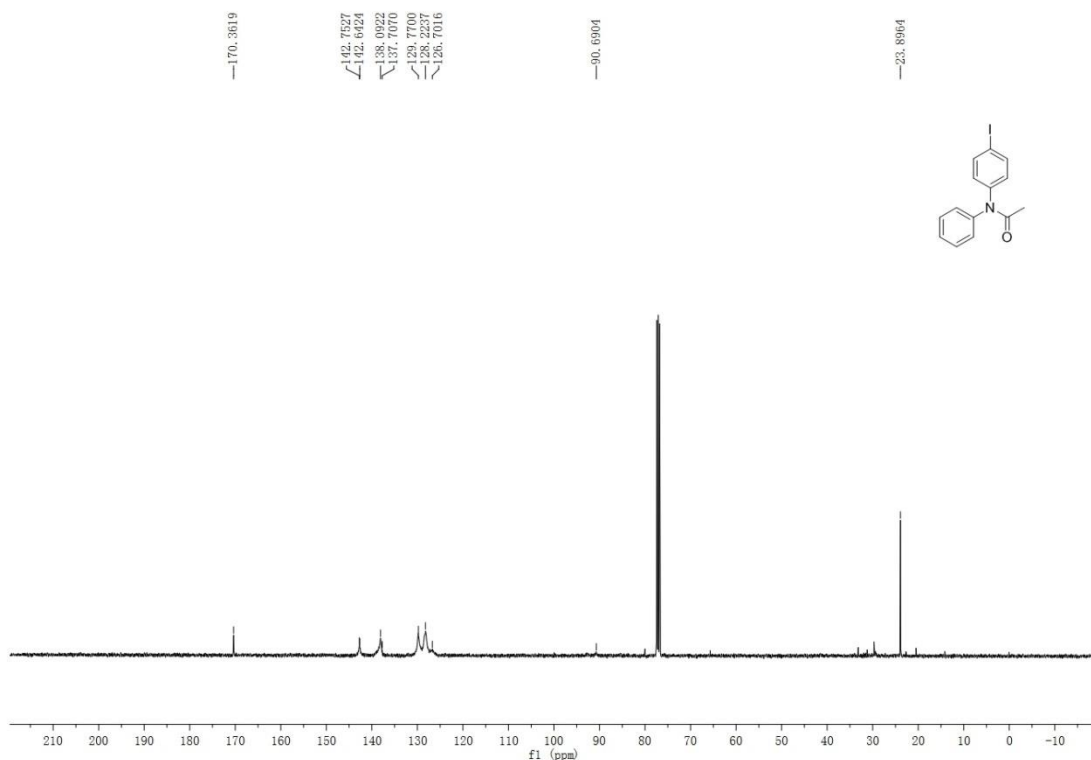

# N-(4-iodo-3-methylphenyl)-N-phenylacetamide(3ba)

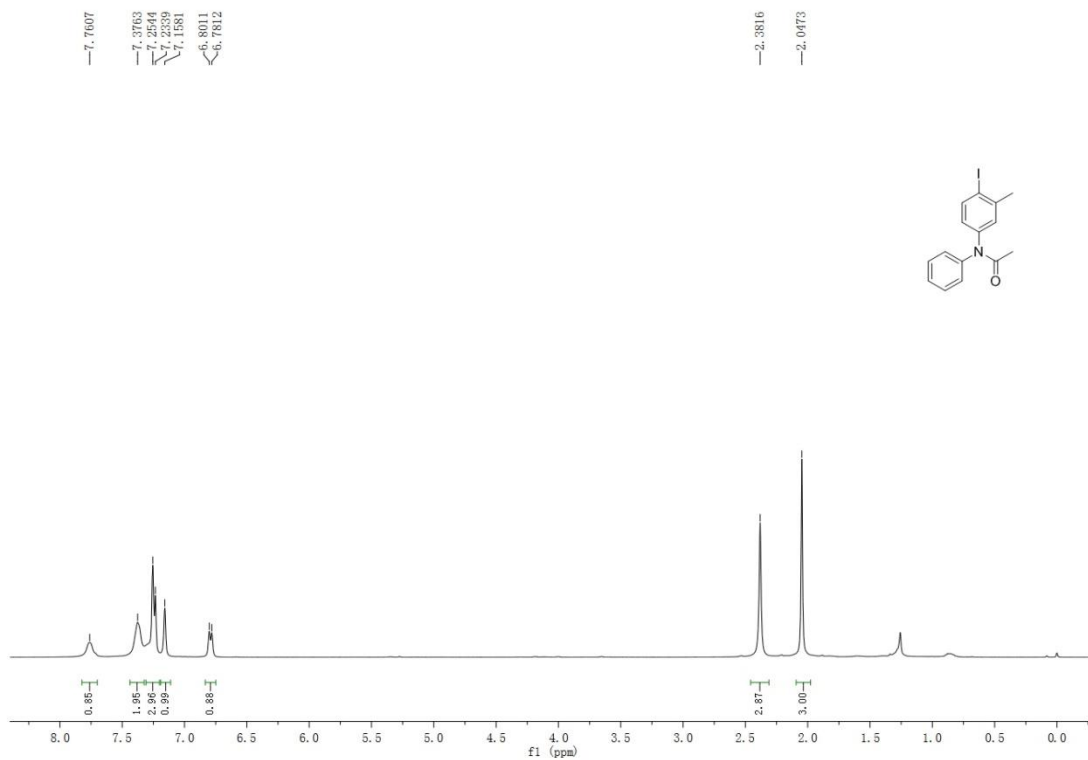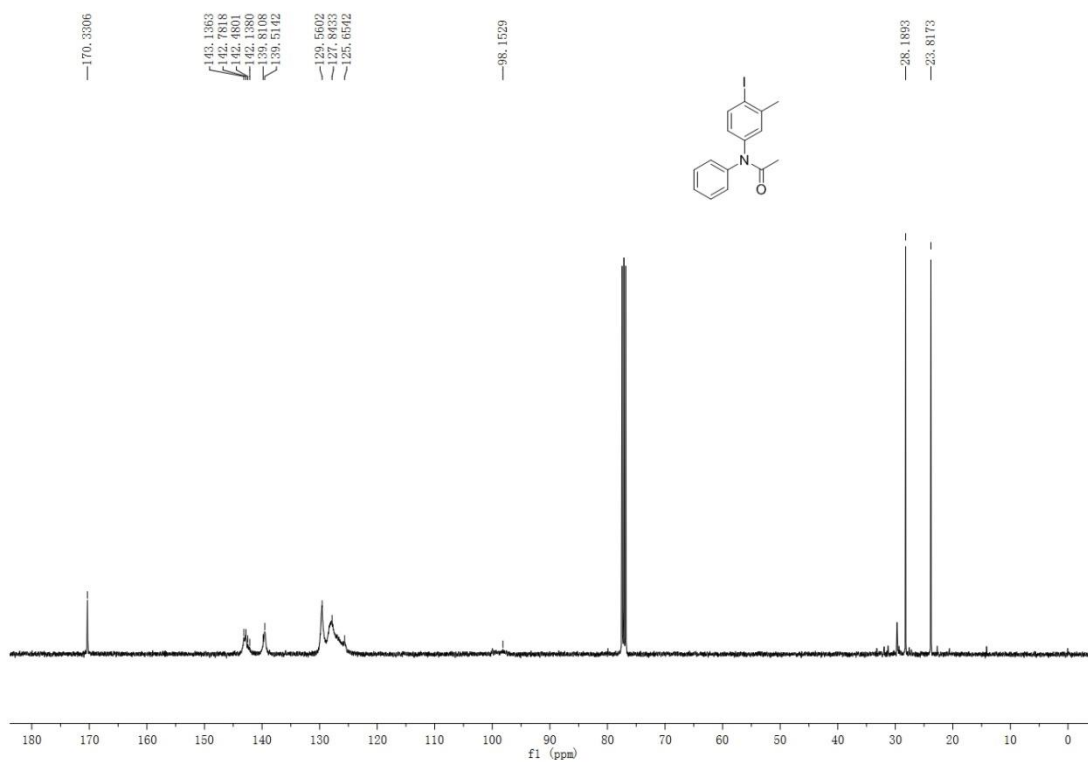

# N-(3-ethyl-4-iodophenyl)-N-phenylacetamide(3ca)

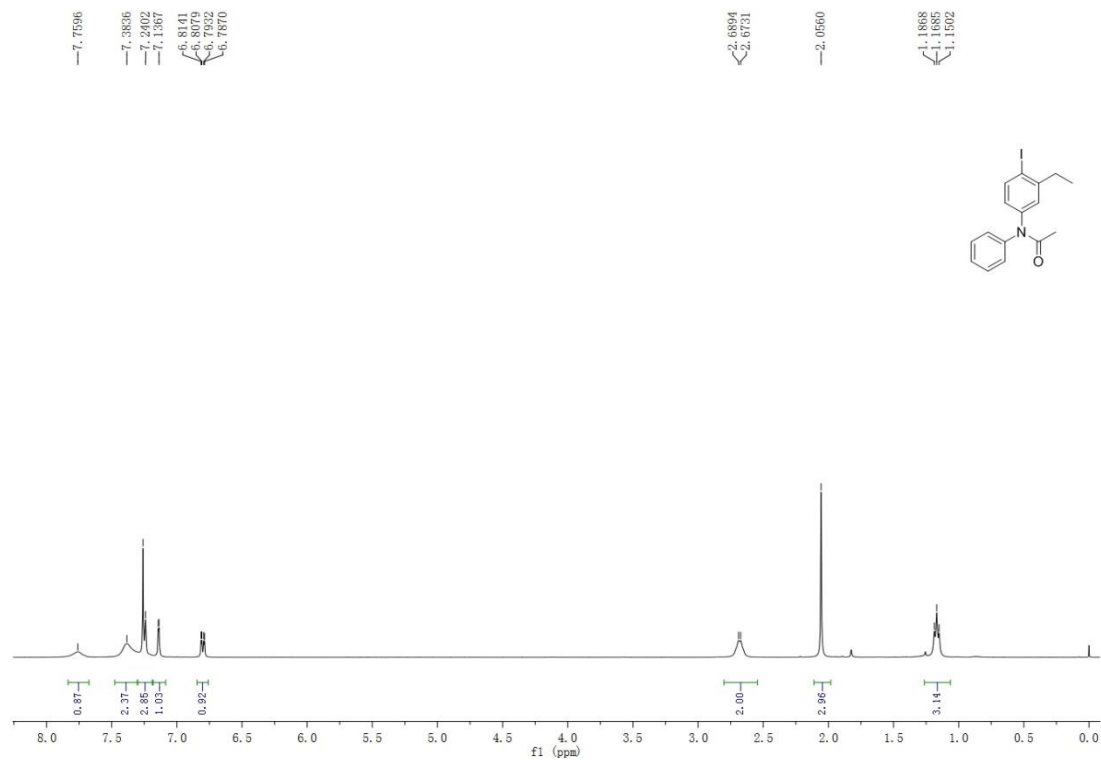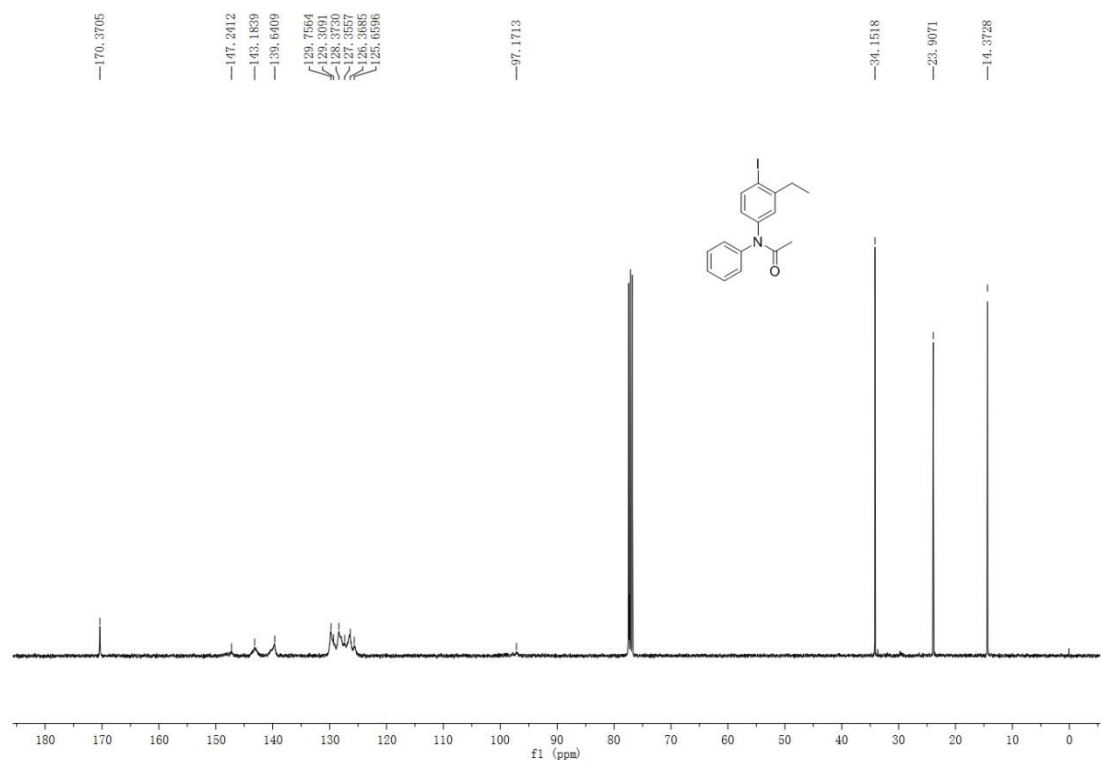

# N-(4-iodo-3-isopropylphenyl)-N-phenylacetamide(3da)

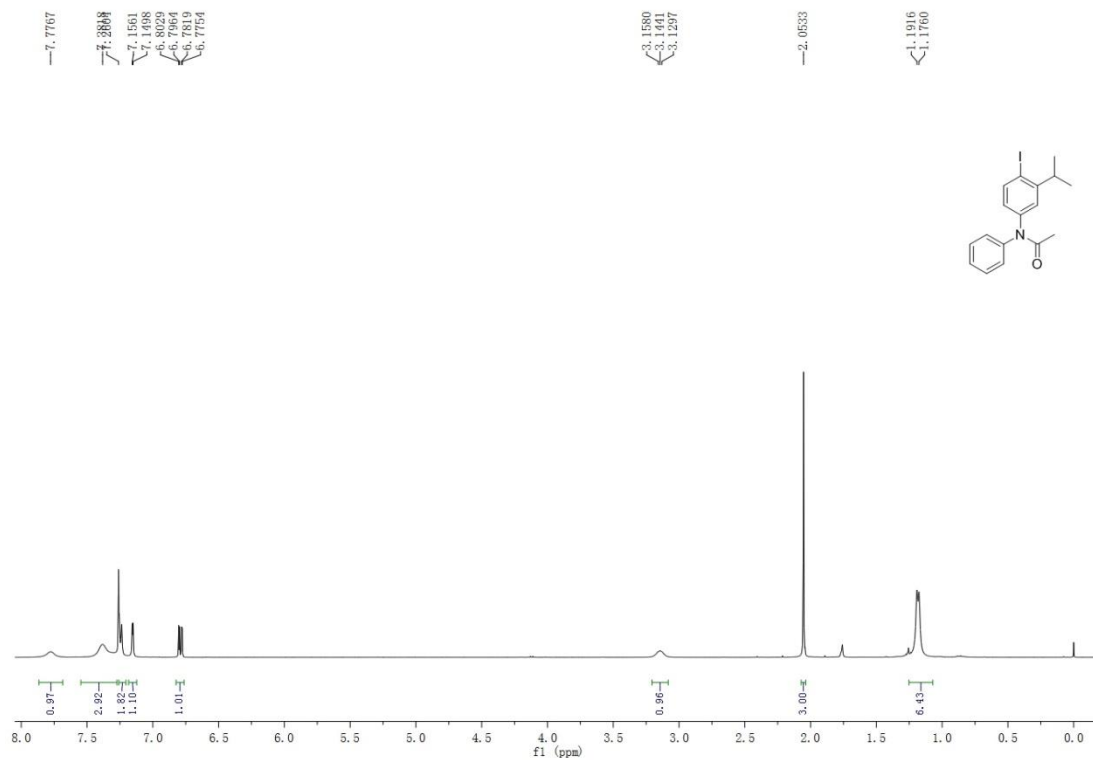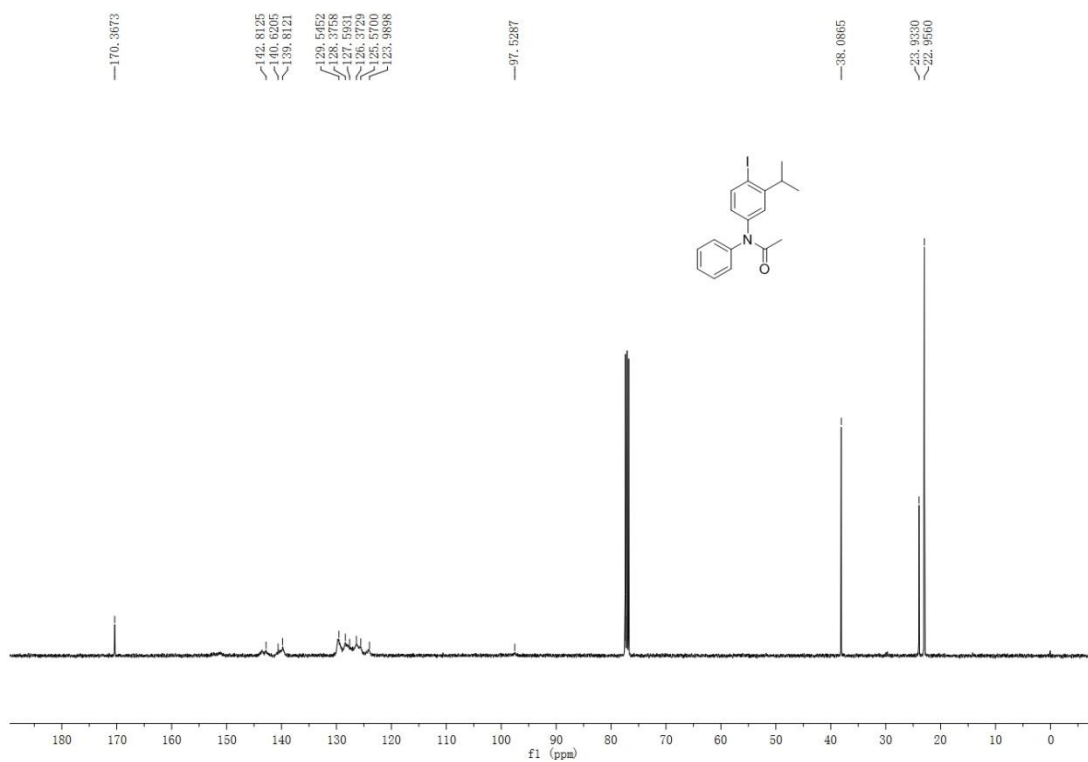

# N-(6-iodo-[1,1'-biphenyl]-3-yl)-N-phenylacetamide(3ea)

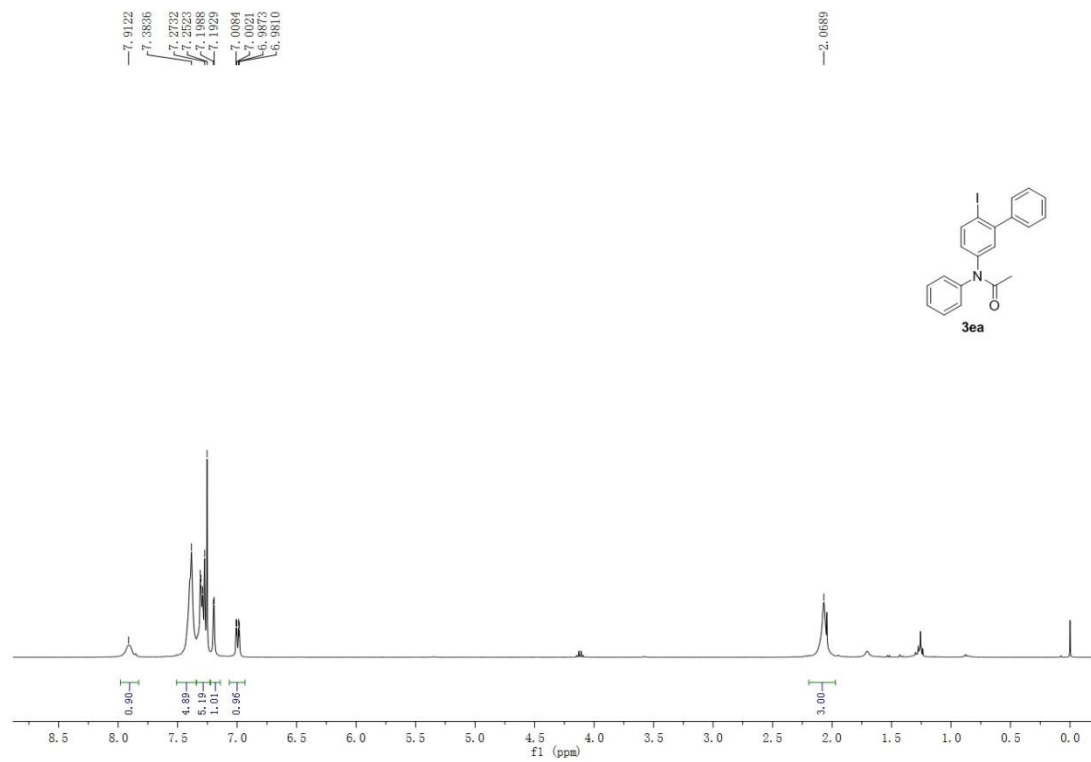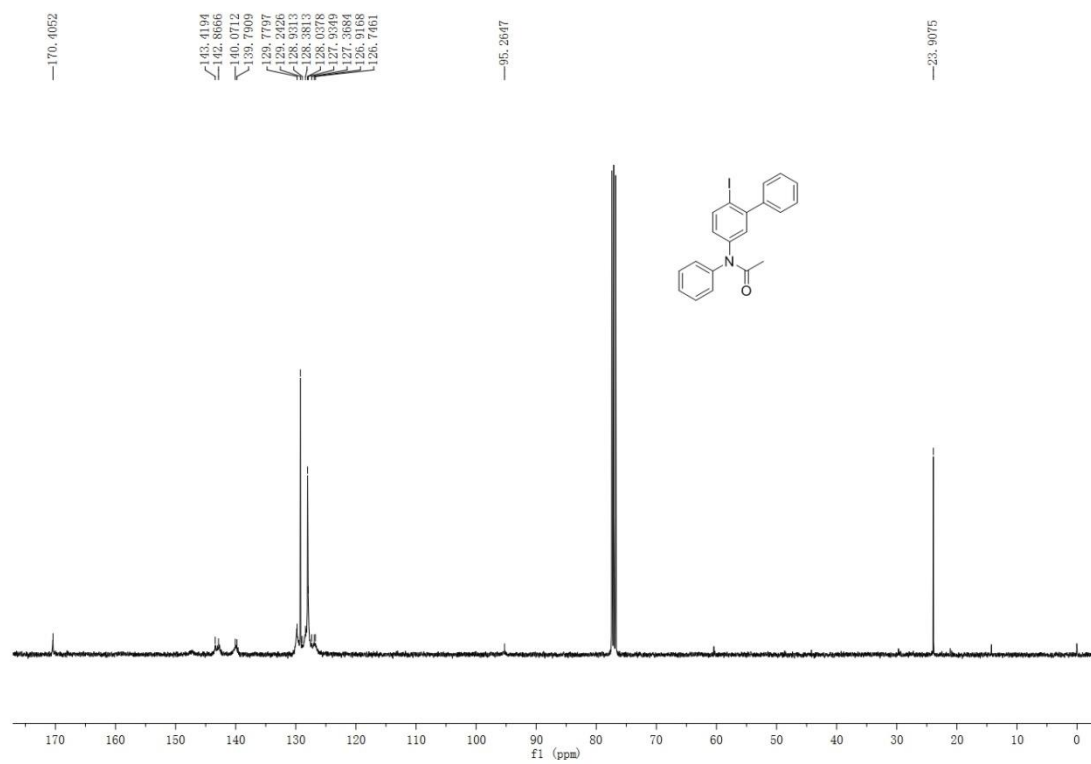

# N-(3-(bromomethyl)-4-iodophenyl)-N-phenylacetamide(3fa)

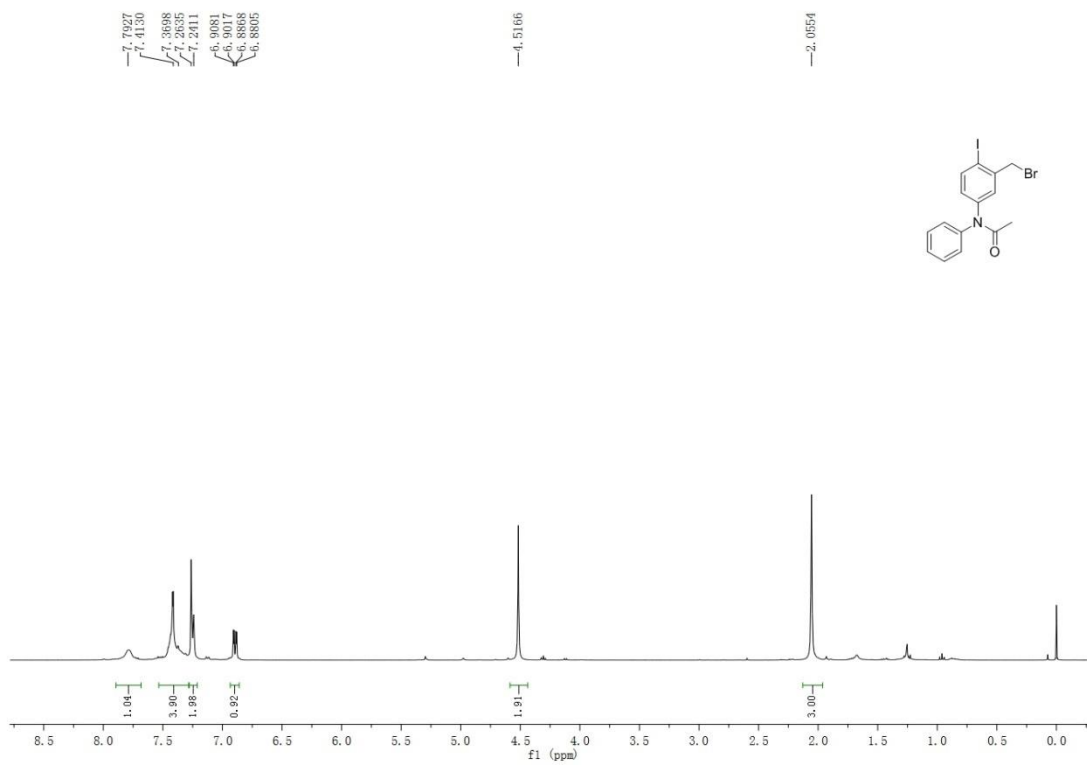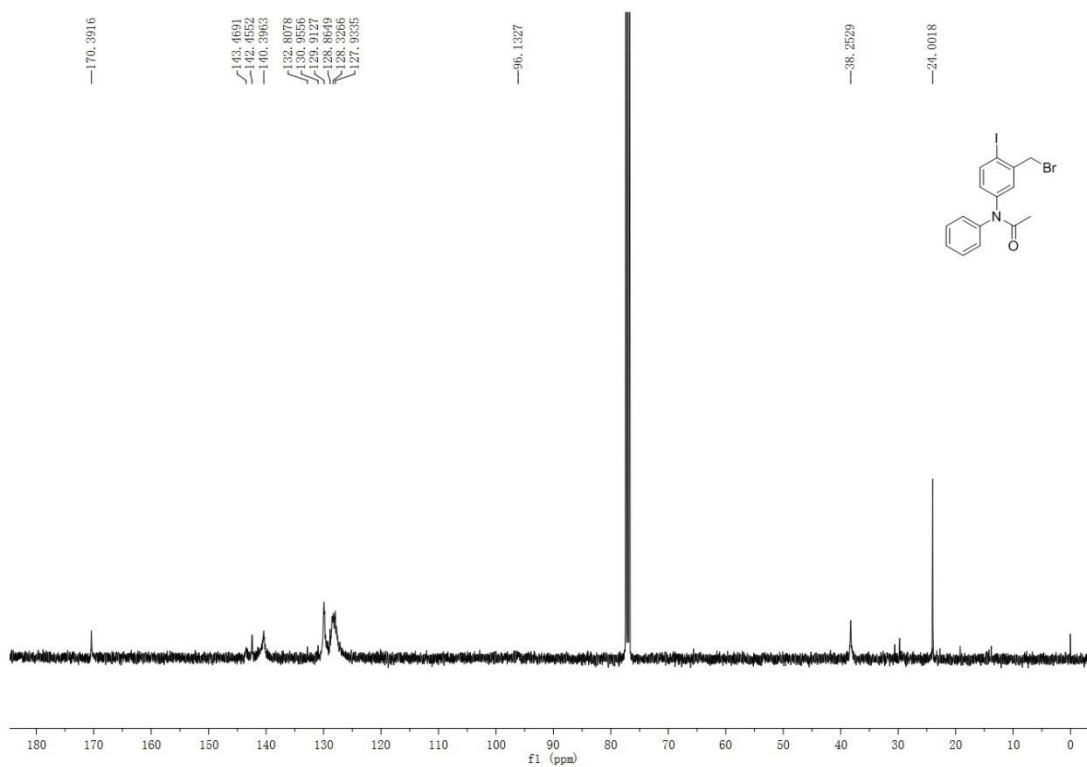



# N-(4-iodo-3-(methoxymethyl)phenyl)-N-phenylacetamide (3ga)

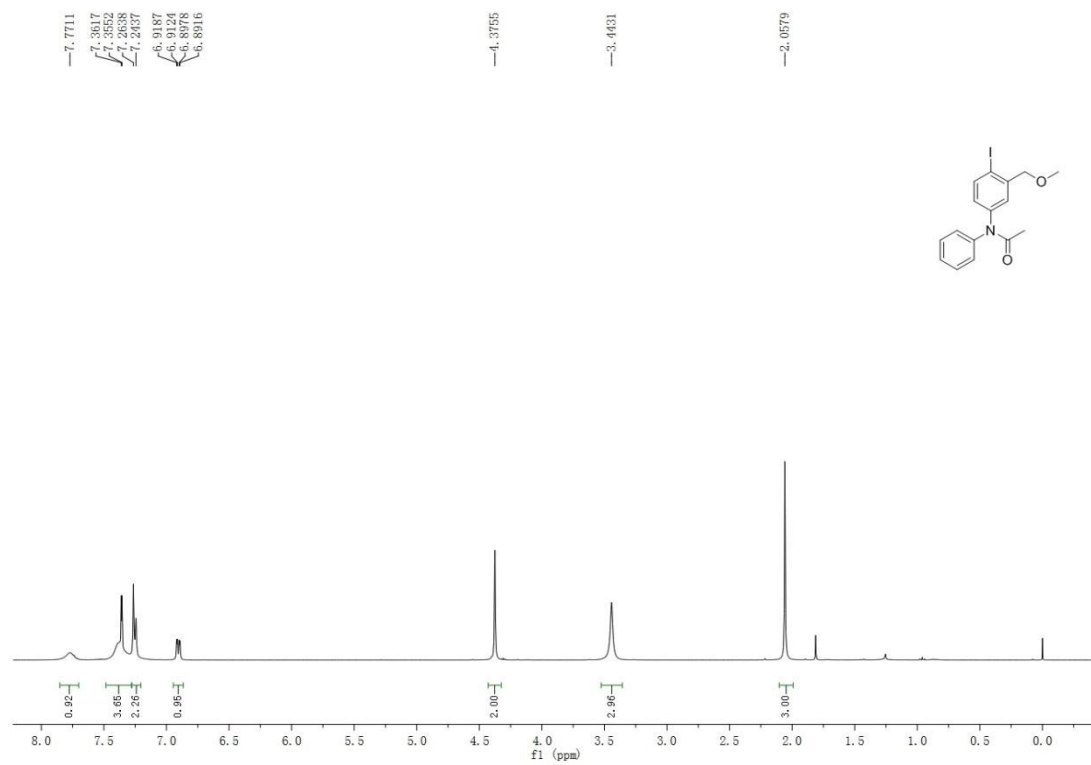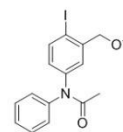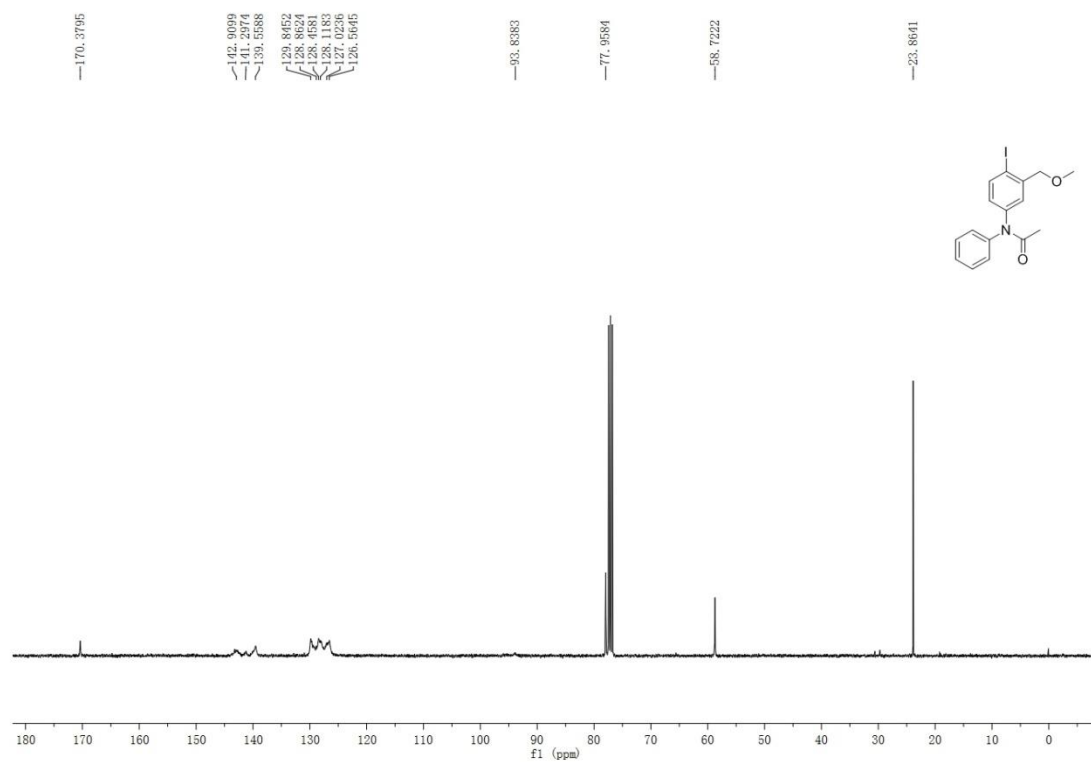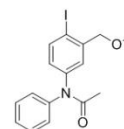

# 2-iodo-5-(N-phenylacetamido)benzyl acetate (3ha)

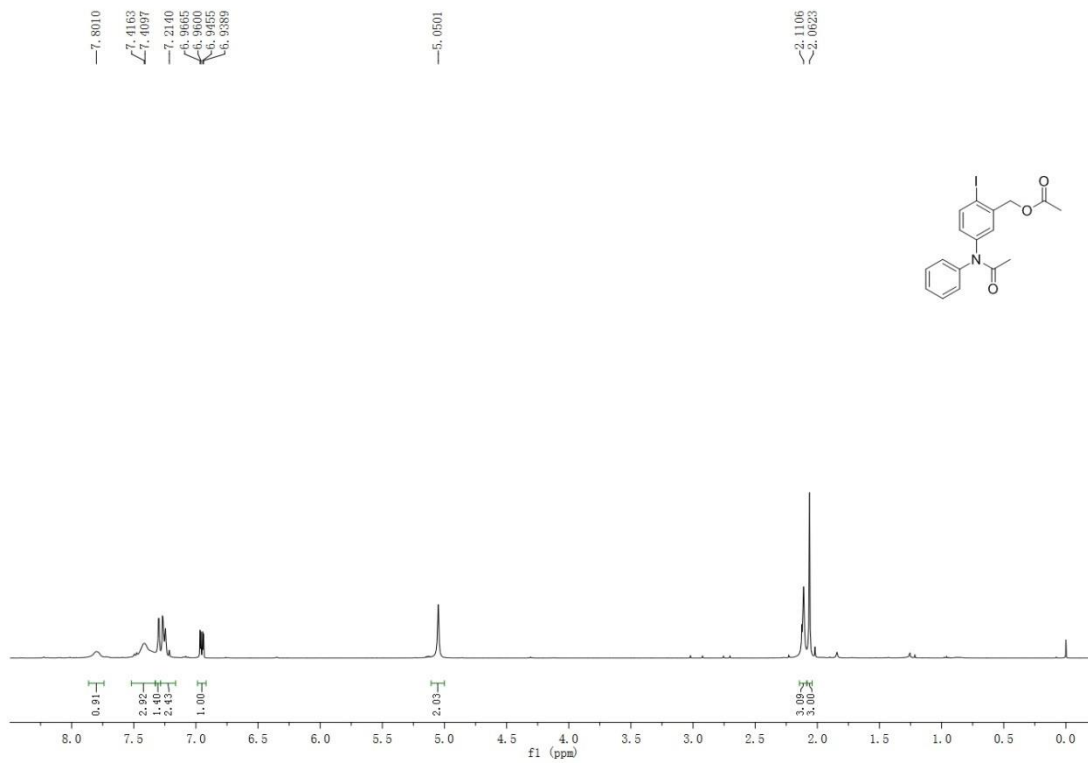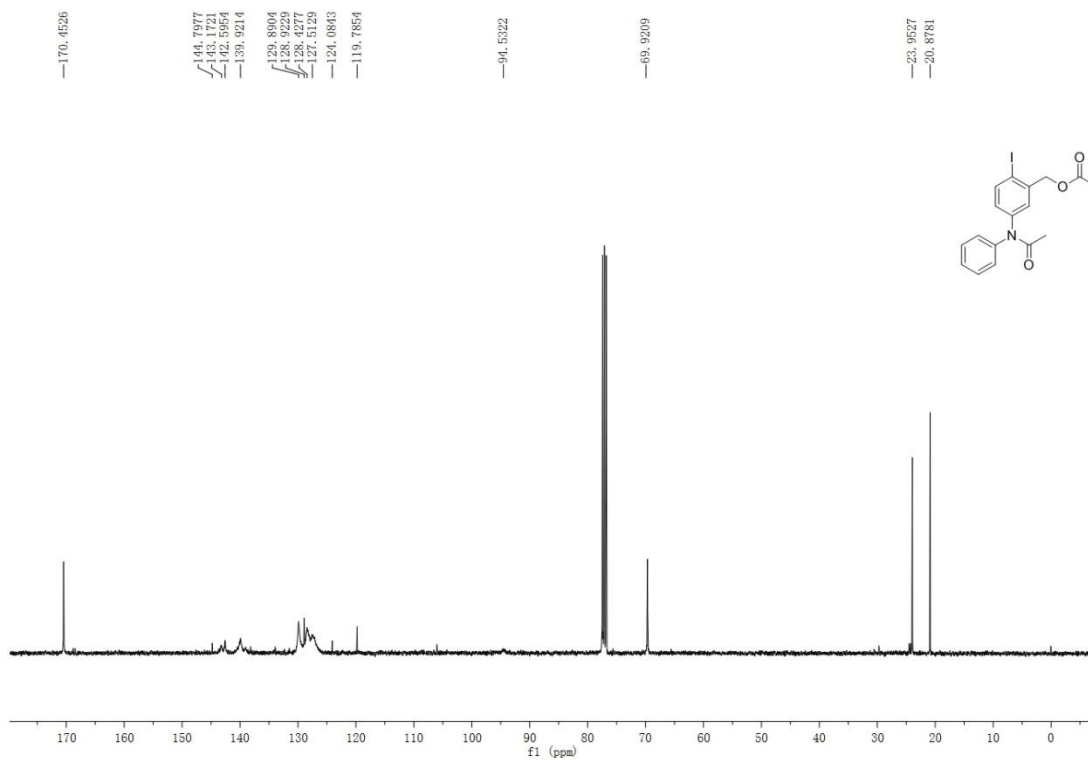

# N-(4-iodo-3,5-dimethylphenyl)-N-phenylacetamide(3ia)

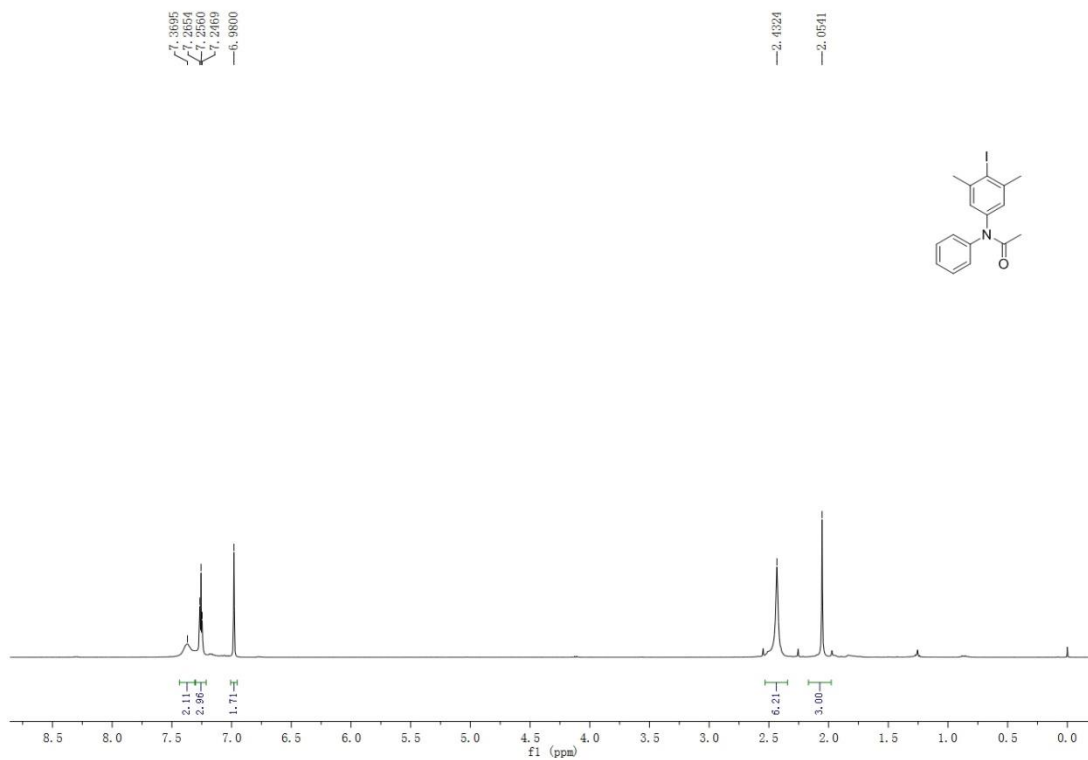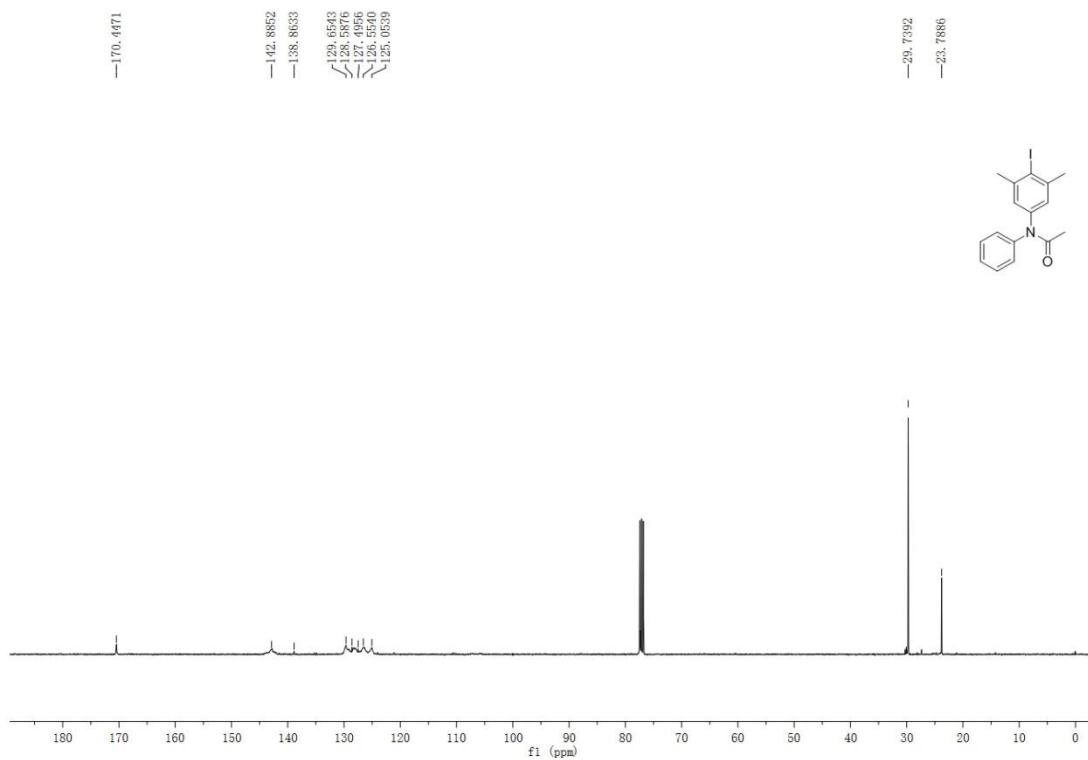

# N-(3-ethyl-4-iodo-5-methylphenyl)-N-phenylacetamide(3ja)

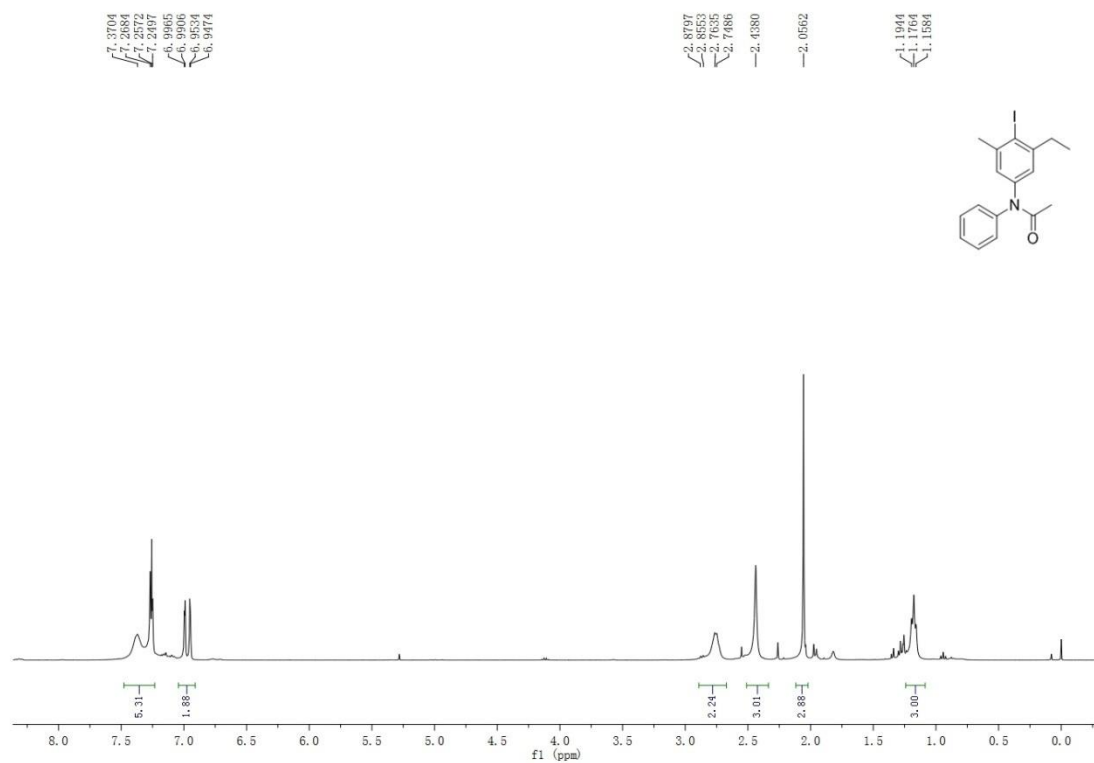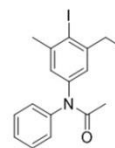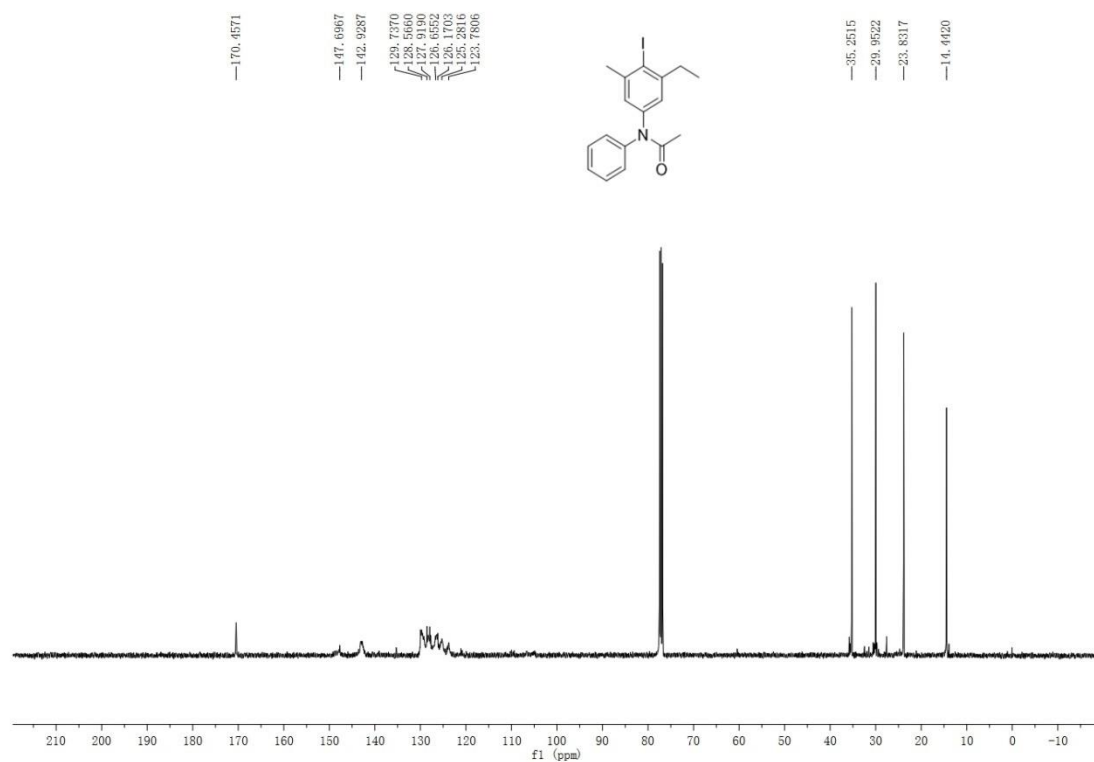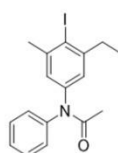

# N-(4-fluorophenyl)-N-(4-iodo-2-methylphenyl)acetamide (3kb)

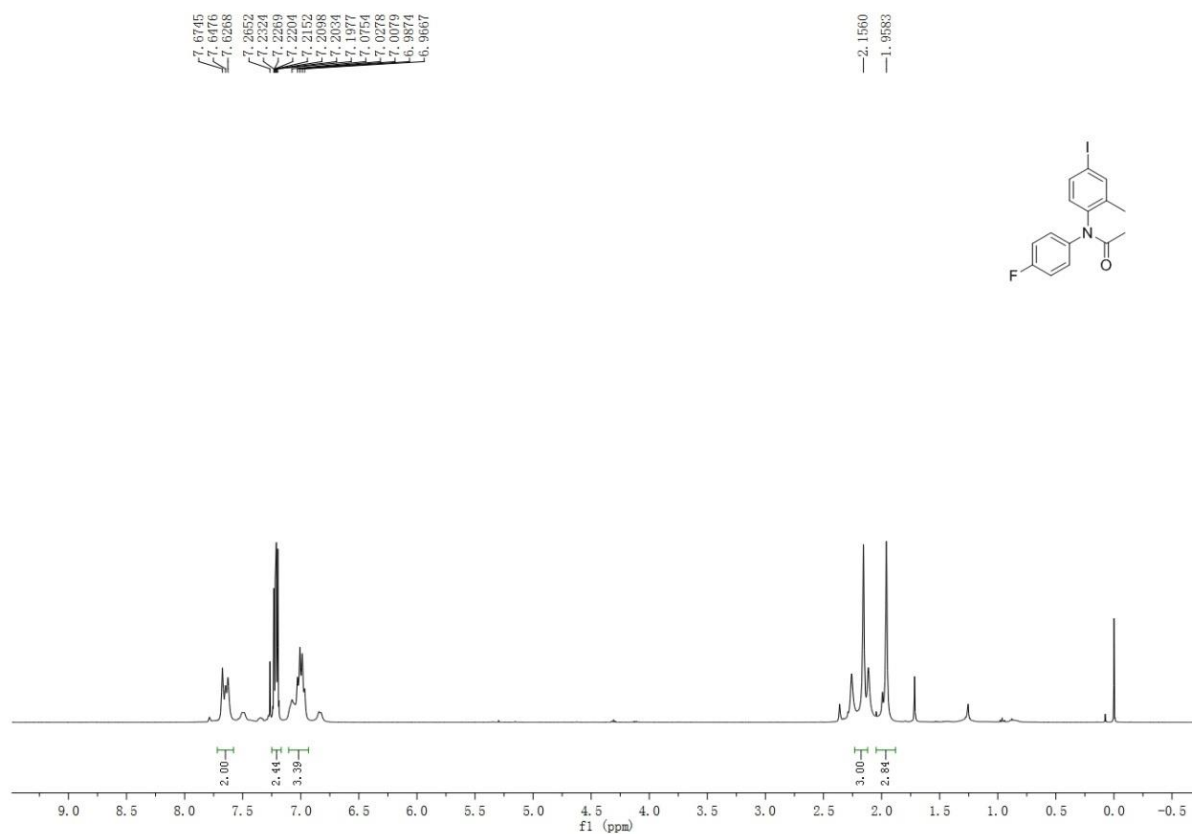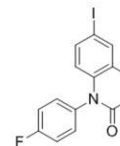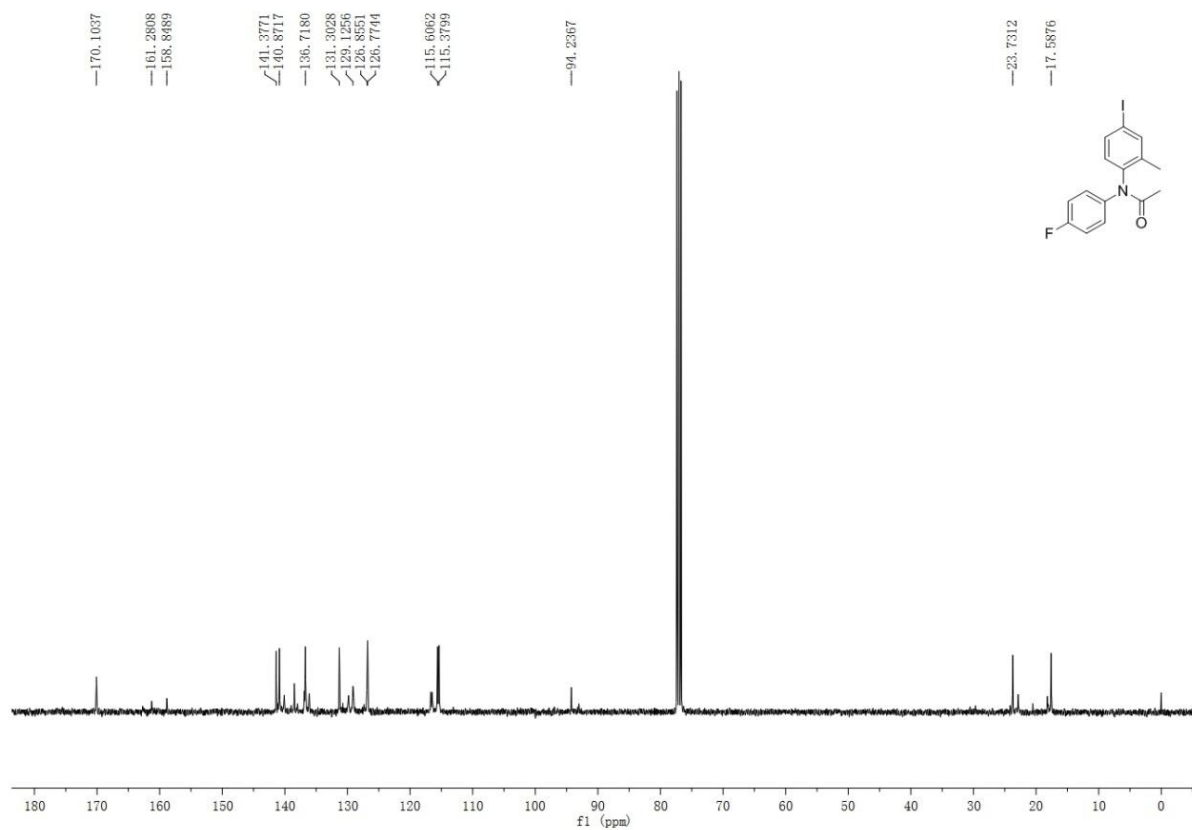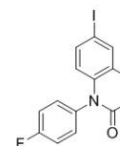

# N-(4-fluorophenyl)-N-(4-iodo-2,6-dimethylphenyl)acetamide (3Ib)

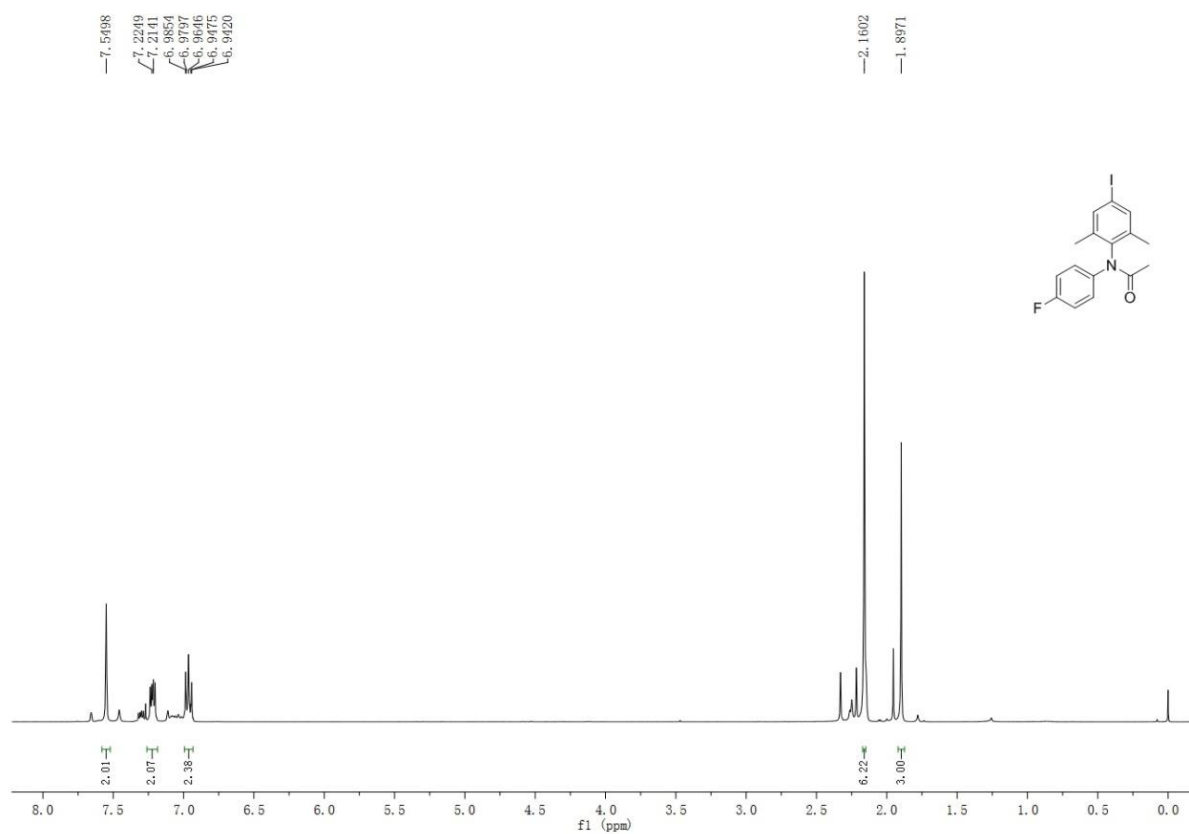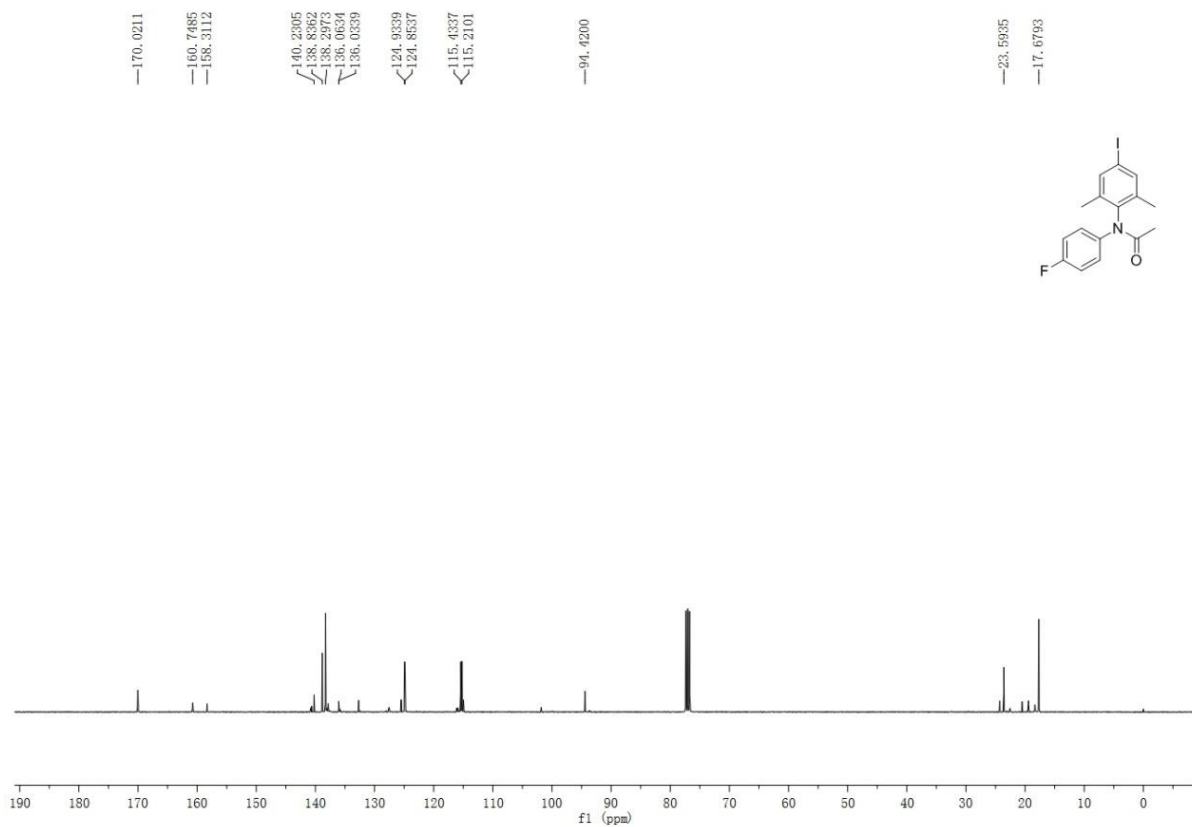

**N-(4-fluorophenyl)-N-(4-iodo-2,3-dimethylphenyl)acetamide (3mb)**

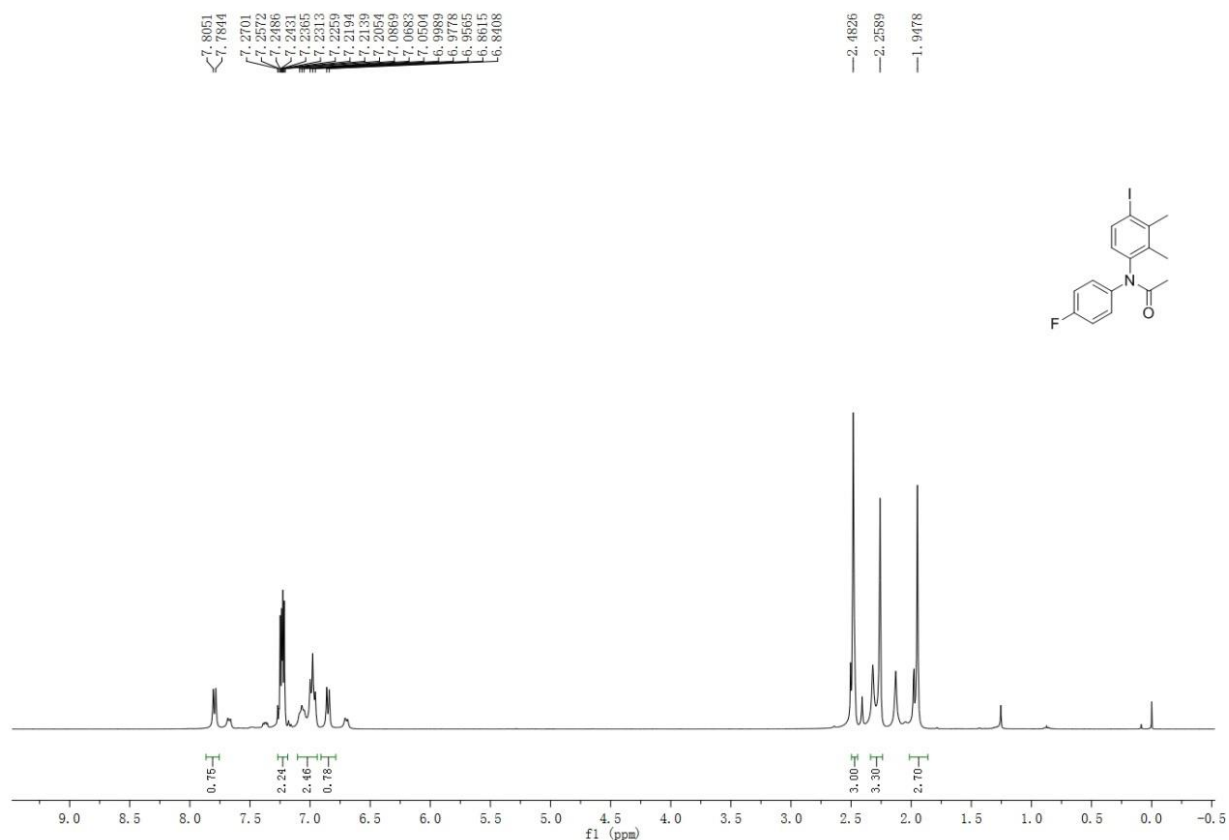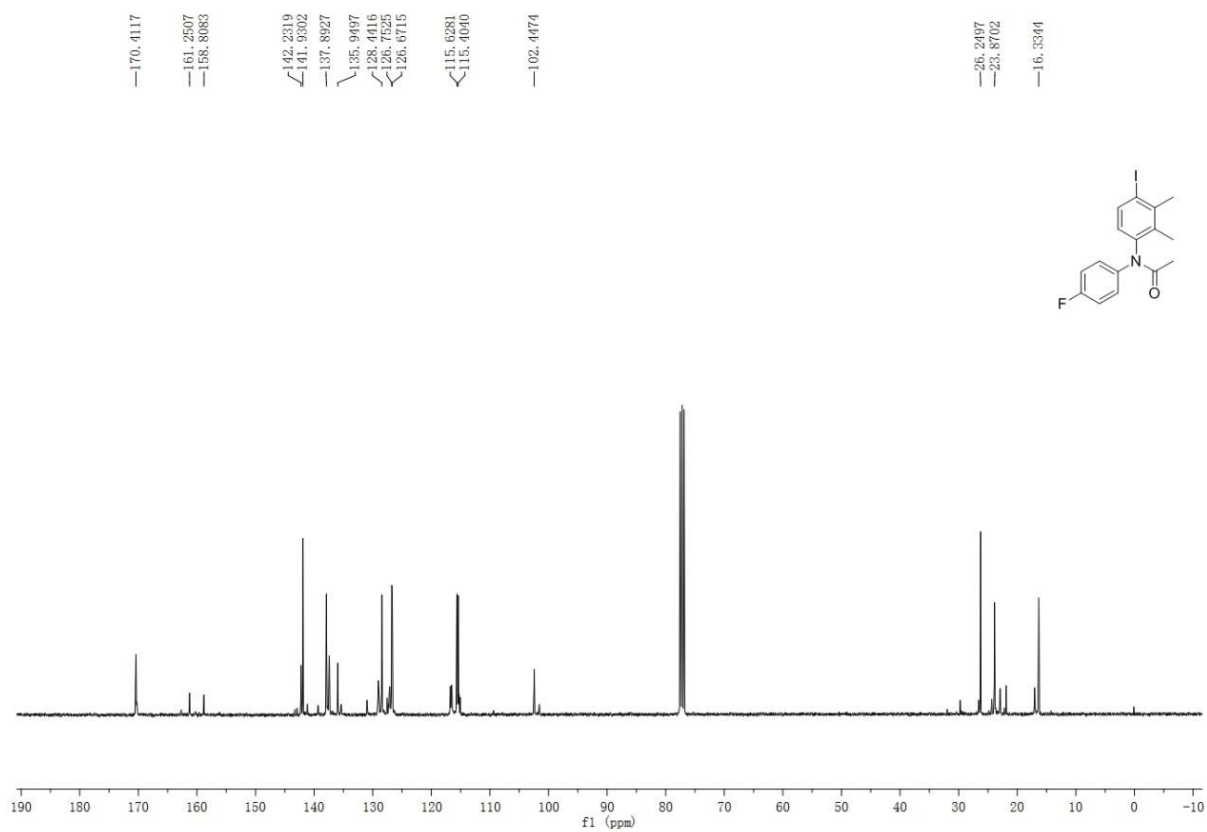

# N-(4-fluorophenyl)-N-(4-iodo-3-methylphenyl)acetamide(3bb)

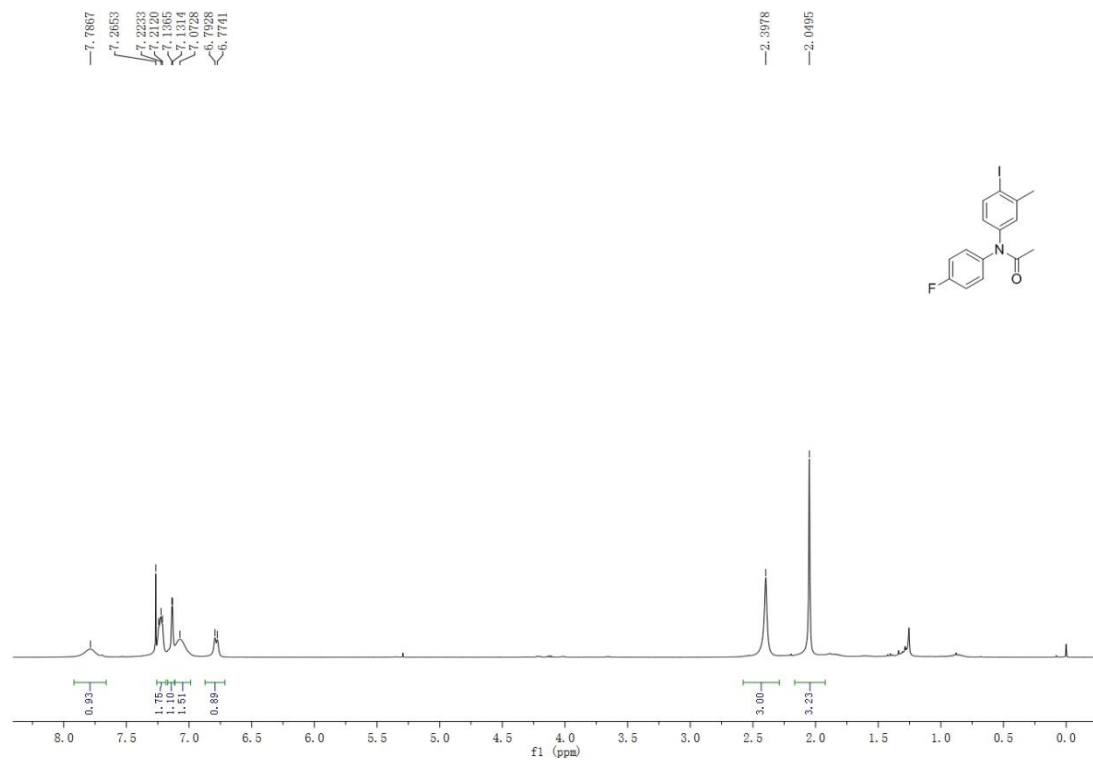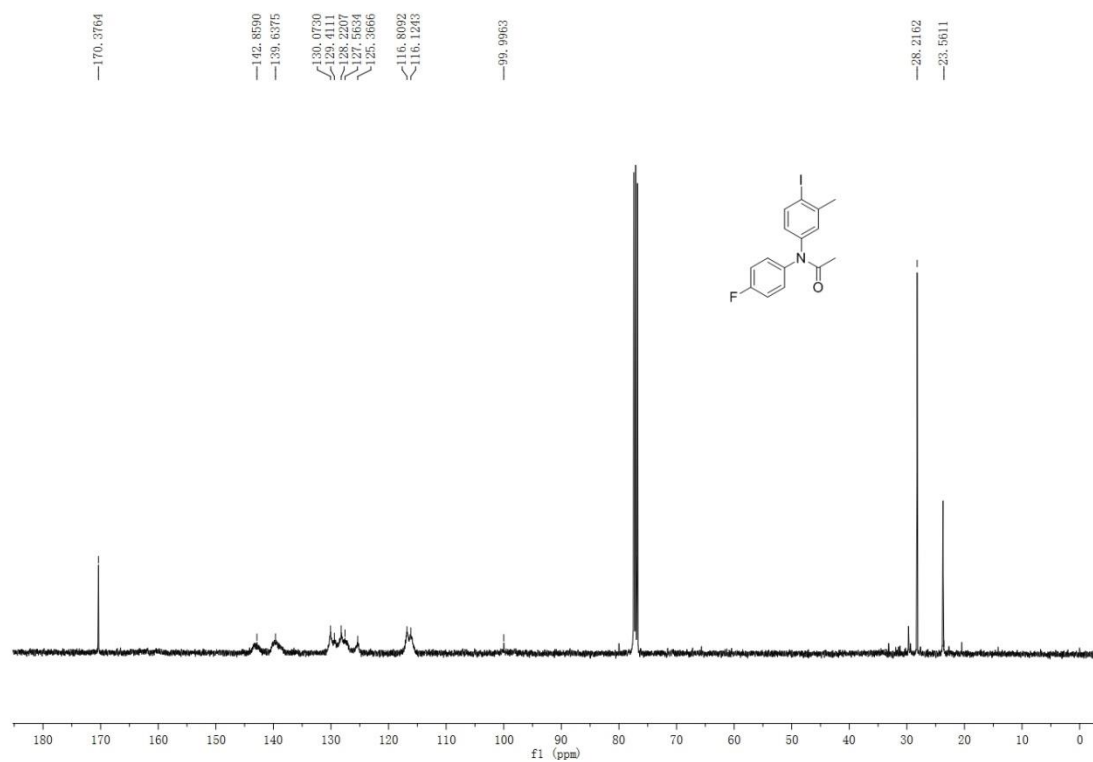



# N-(4-chlorophenyl)-N-(4-iodo-3-methylphenyl)acetamide(3bc)

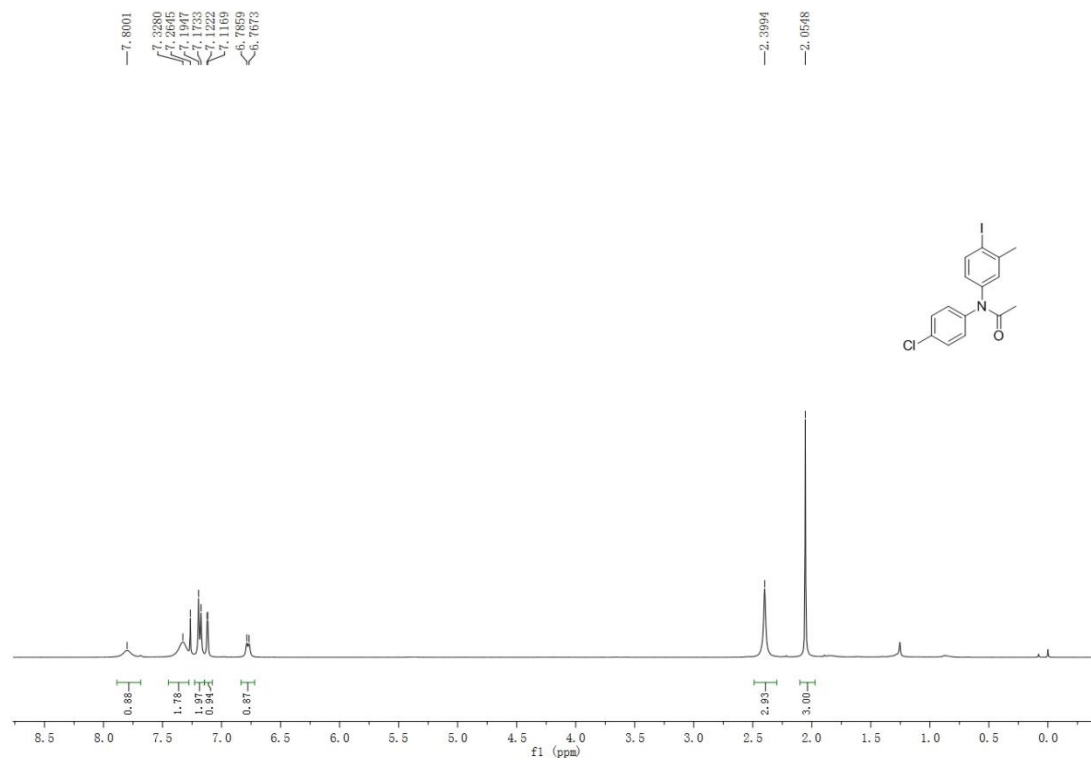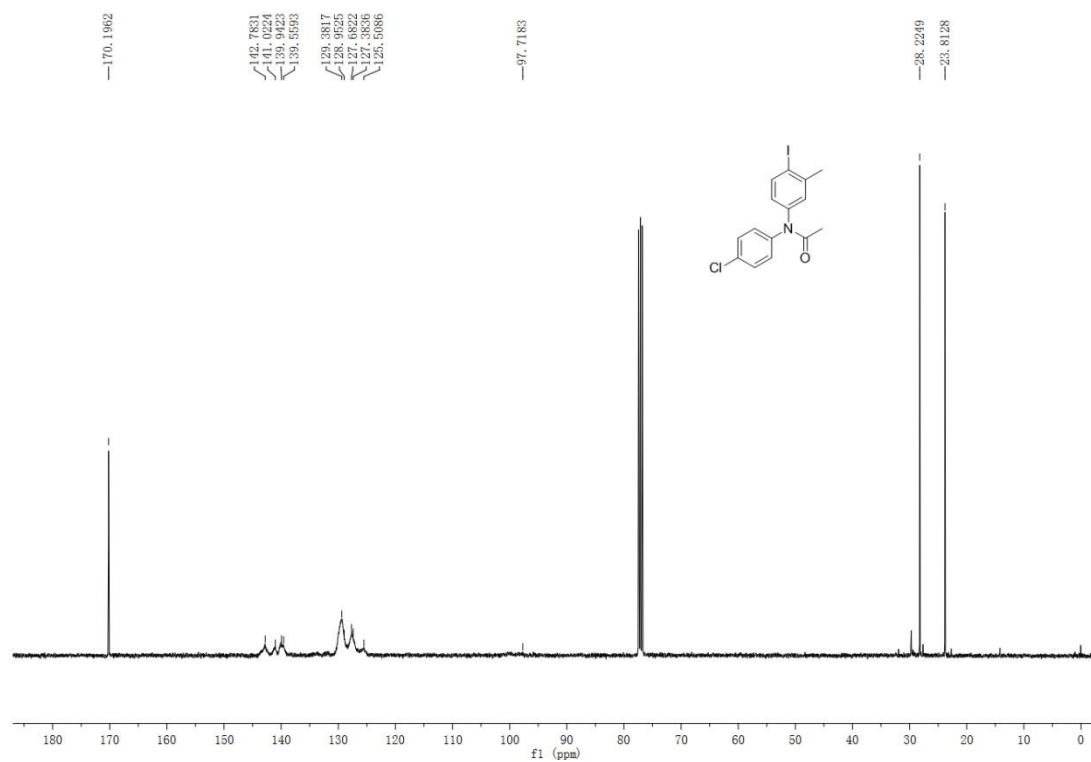

# N-(4-bromophenyl)-N-(4-iodo-3-methylphenyl)acetamide(3bd)

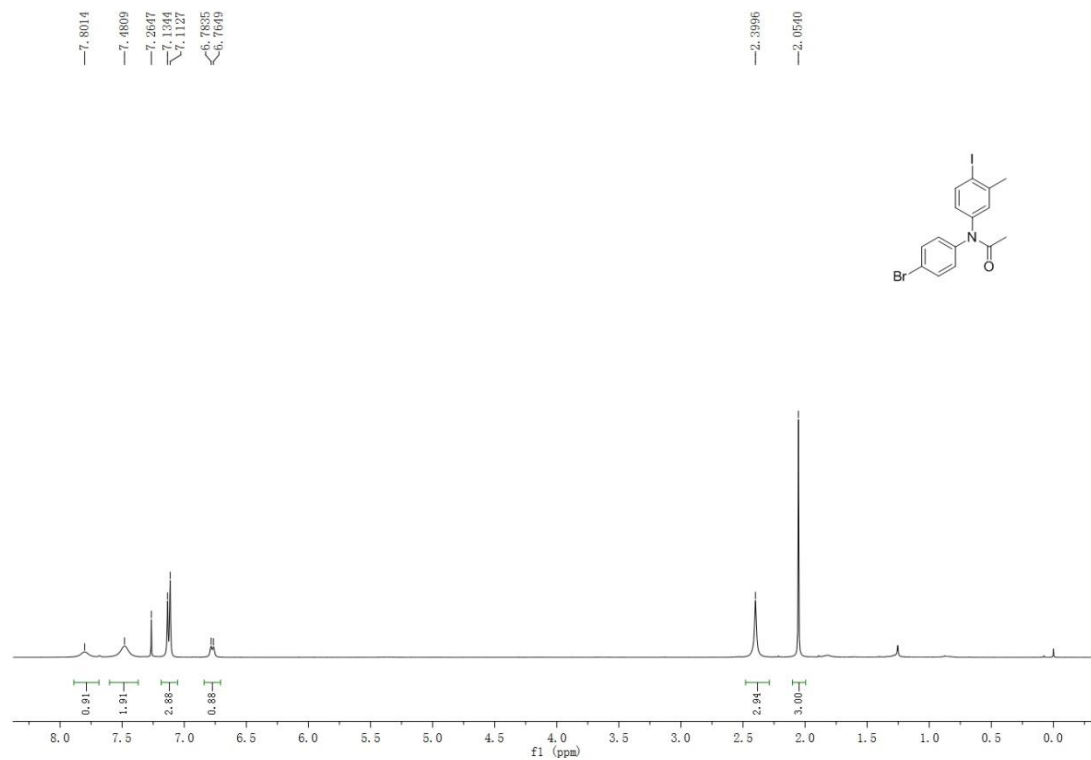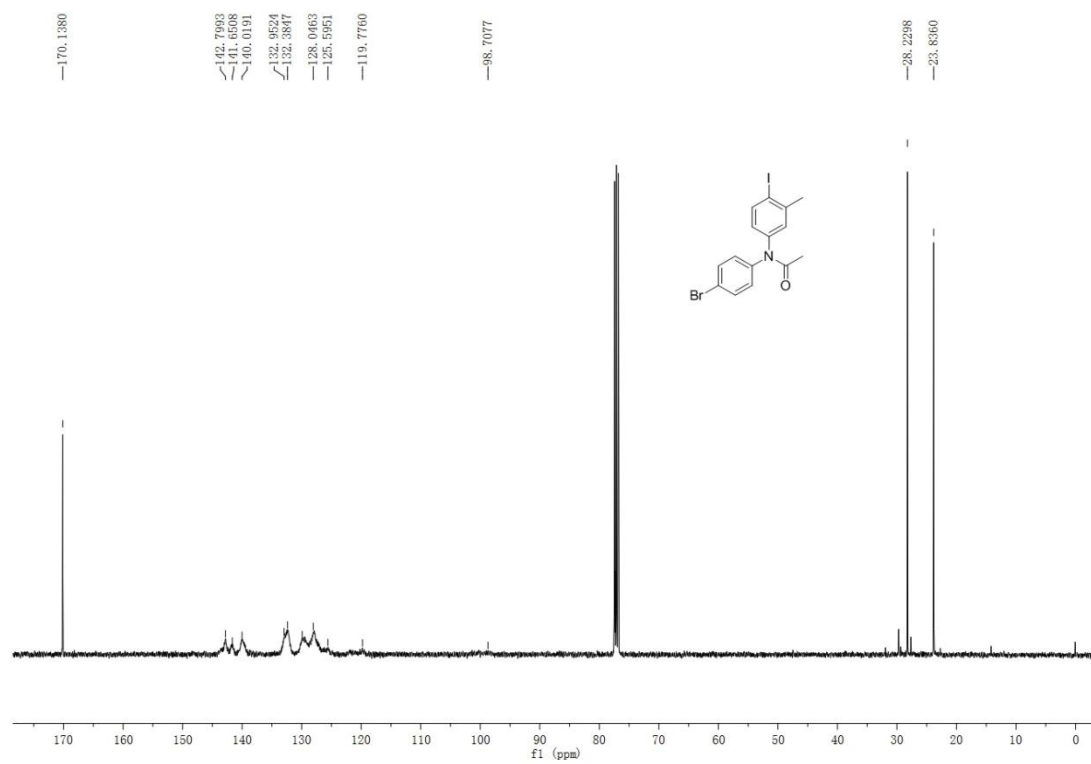

**methyl 4-(N-(4-iodo-3-methylphenyl)acetamido)benzoate (3be)**

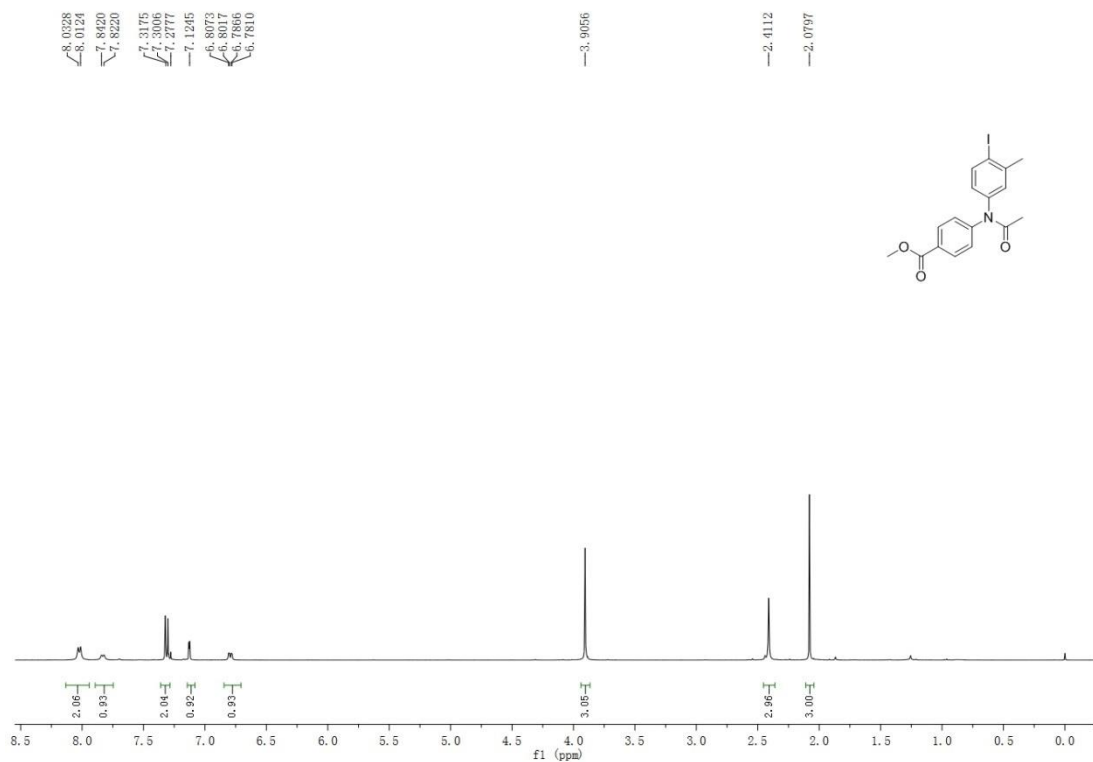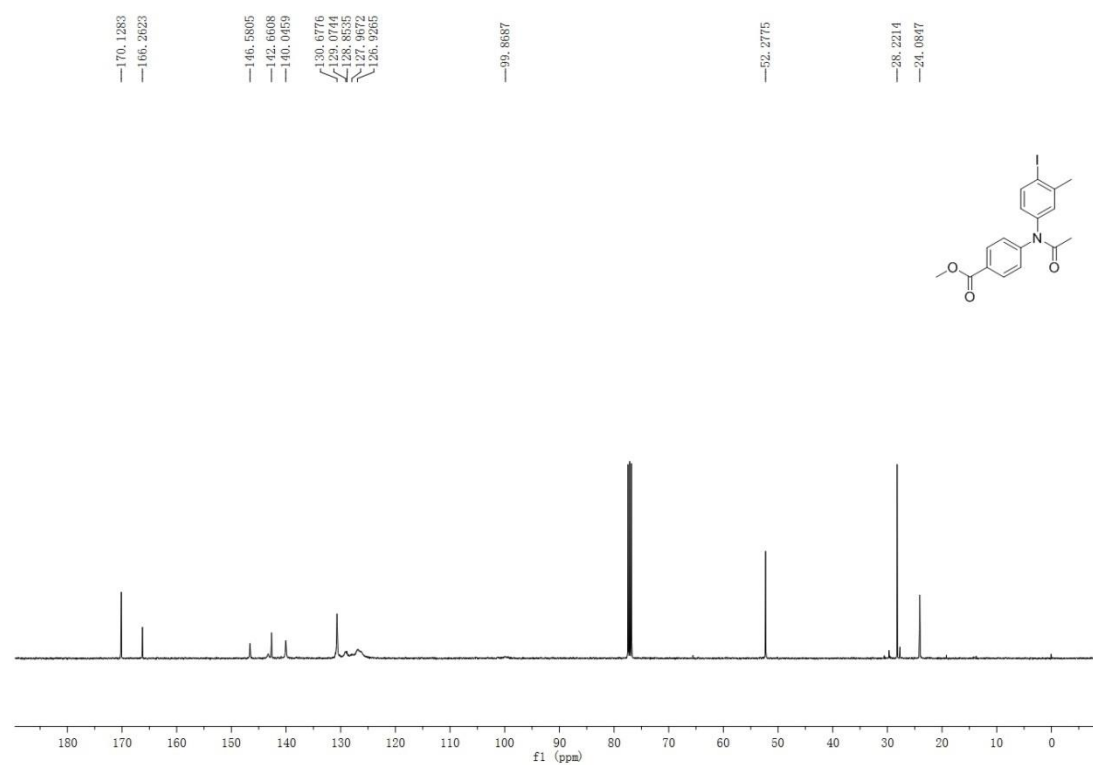

# N-(2-chlorophenyl)-N-(4-iodo-3-methylphenyl)acetamide (3bf)

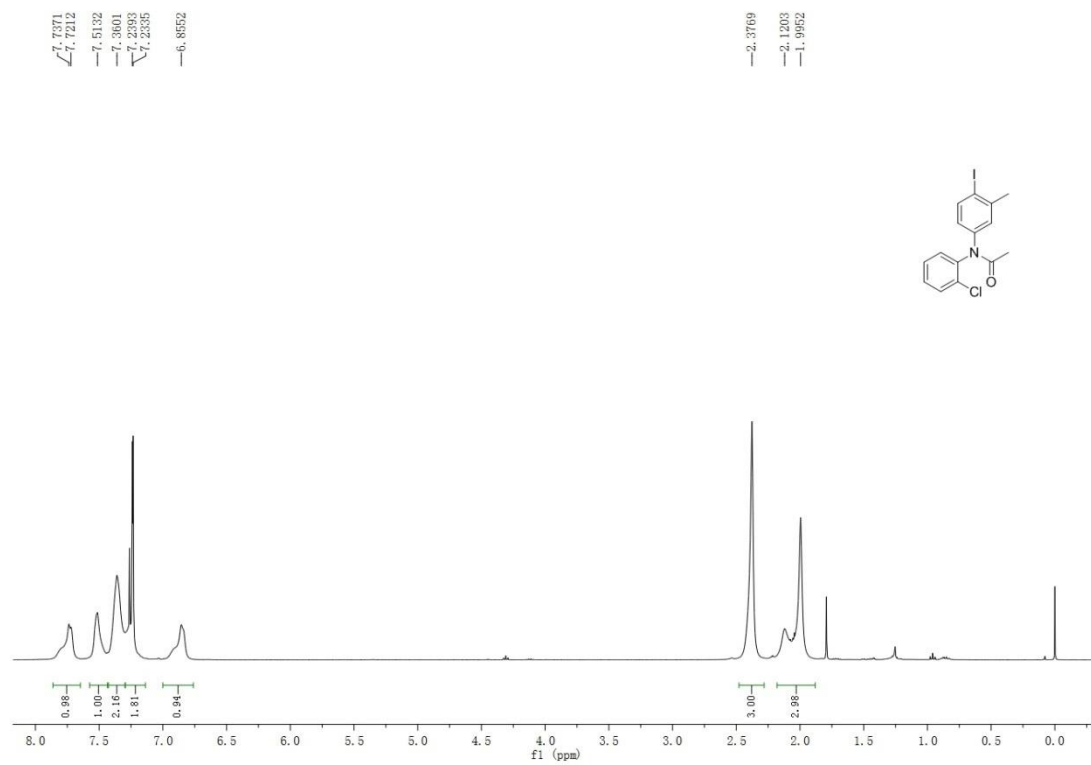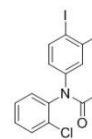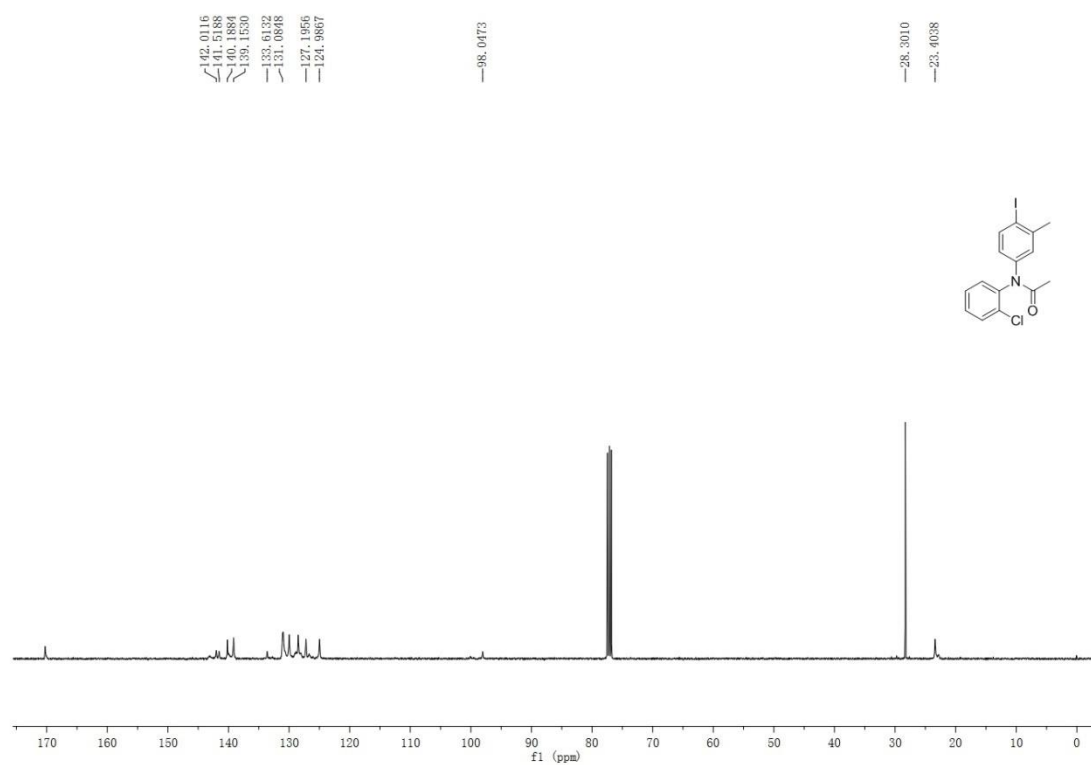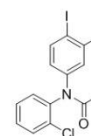

# N-(2-bromophenyl)-N-(4-iodo-3-methylphenyl)acetamide(3bg)

7.7923  
7.7057  
7.6880  
7.3992  
7.2670  
7.2613  
6.8720

2.3714  
1.9941

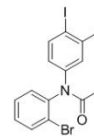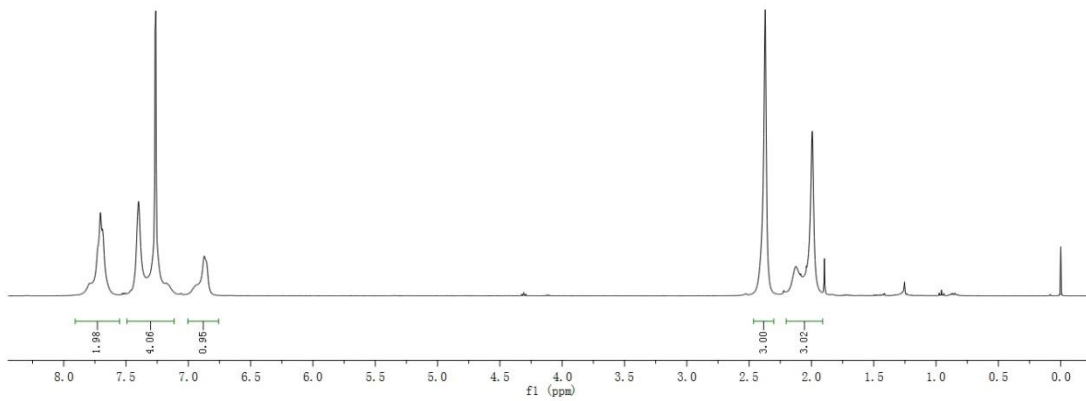

170.1180

141.8891  
141.8574  
141.3924  
139.0363  
134.3583  
131.1121  
130.1889  
129.2082  
127.0228  
124.3584  
124.2988

97.8305

28.3343  
23.8155

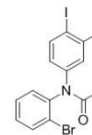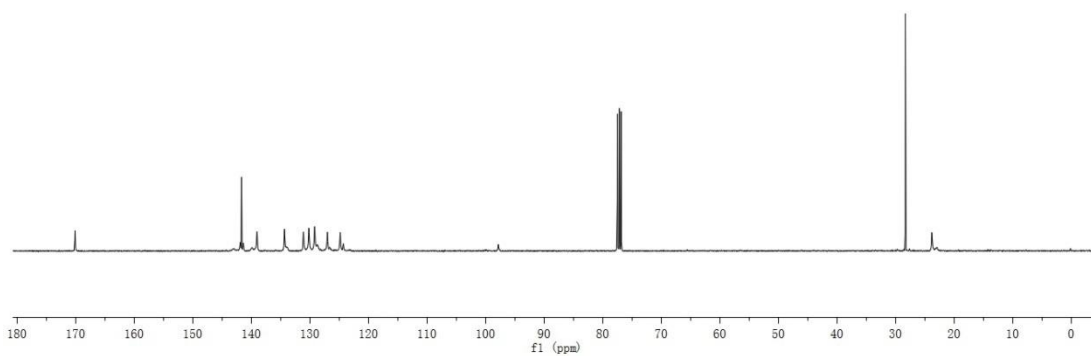

# N-(3-chlorophenyl)-N-(4-iodo-3-methylphenyl)acetamide(3bh)

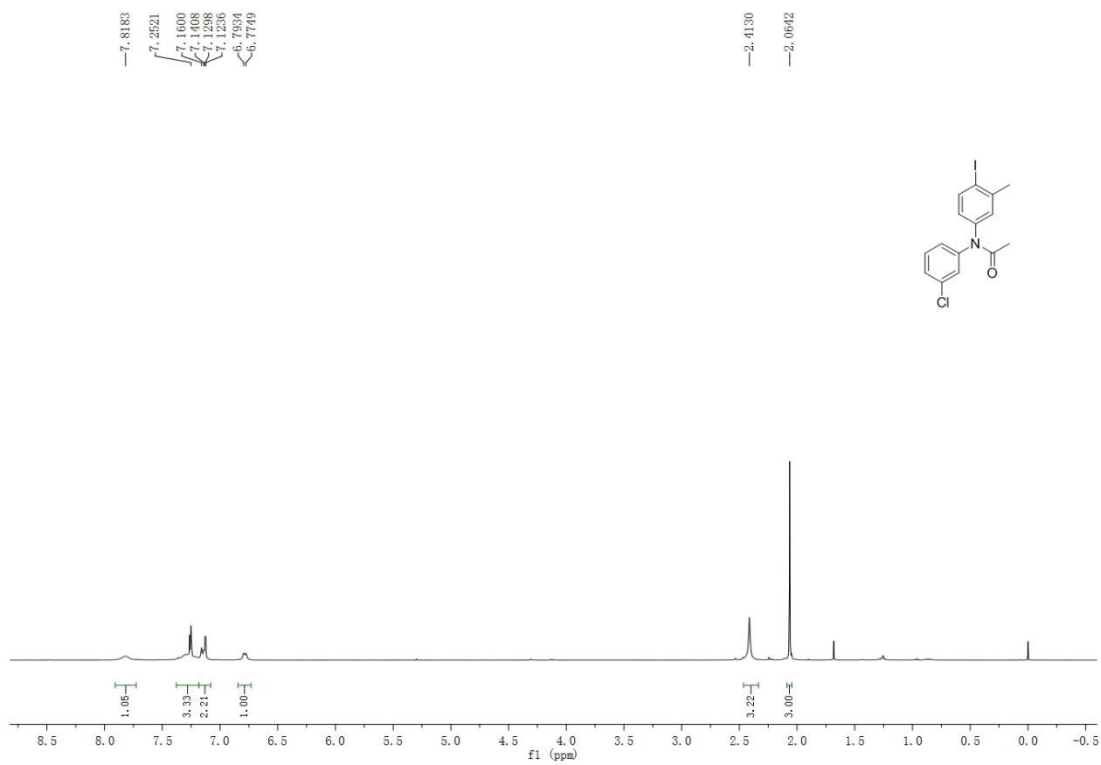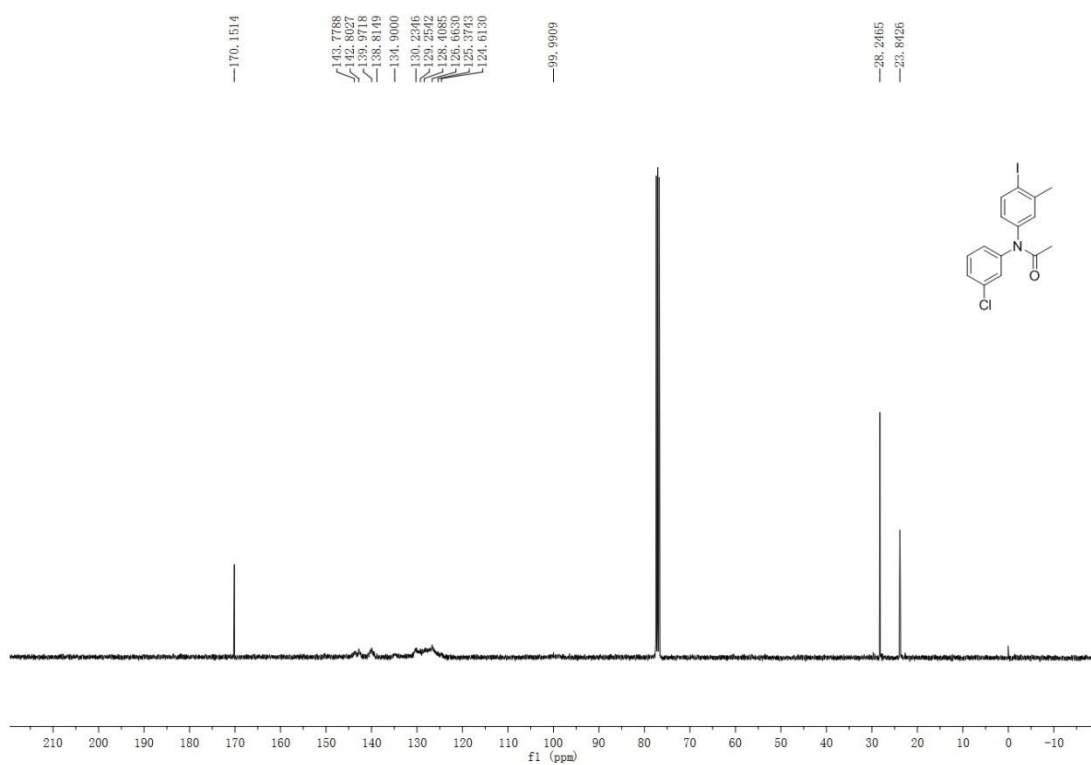

# N-(3-chloro-4-methylphenyl)-N-(4-iodo-3-methylphenyl)acetamide (3bi)

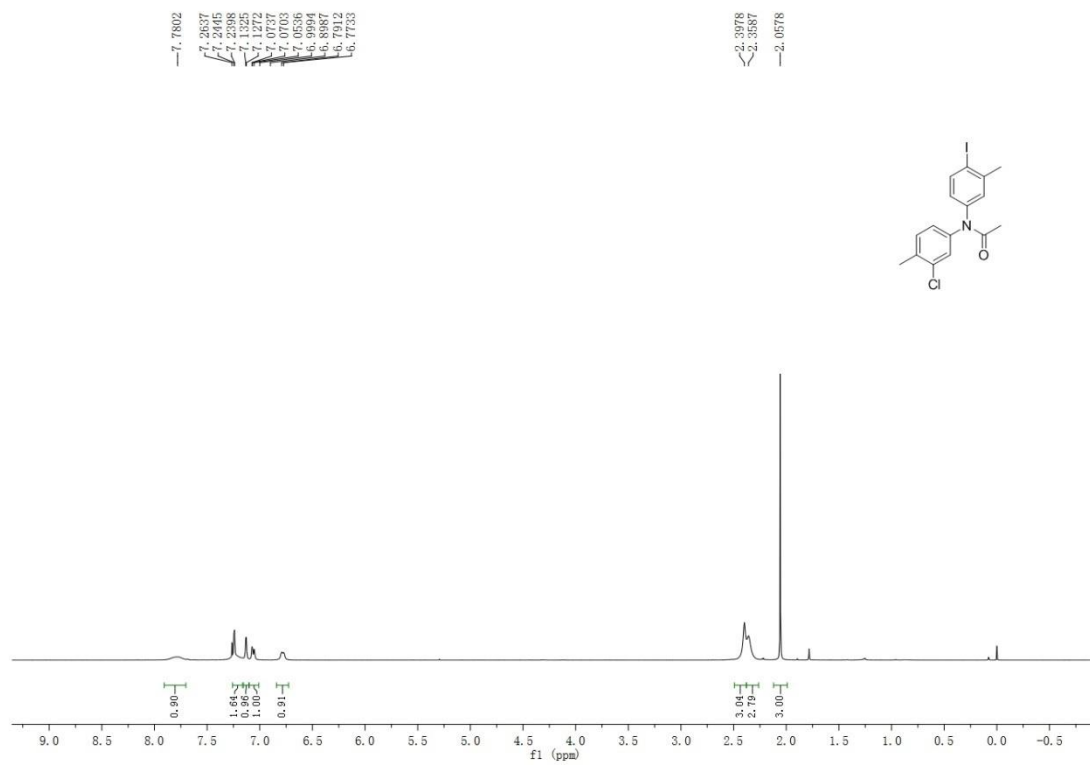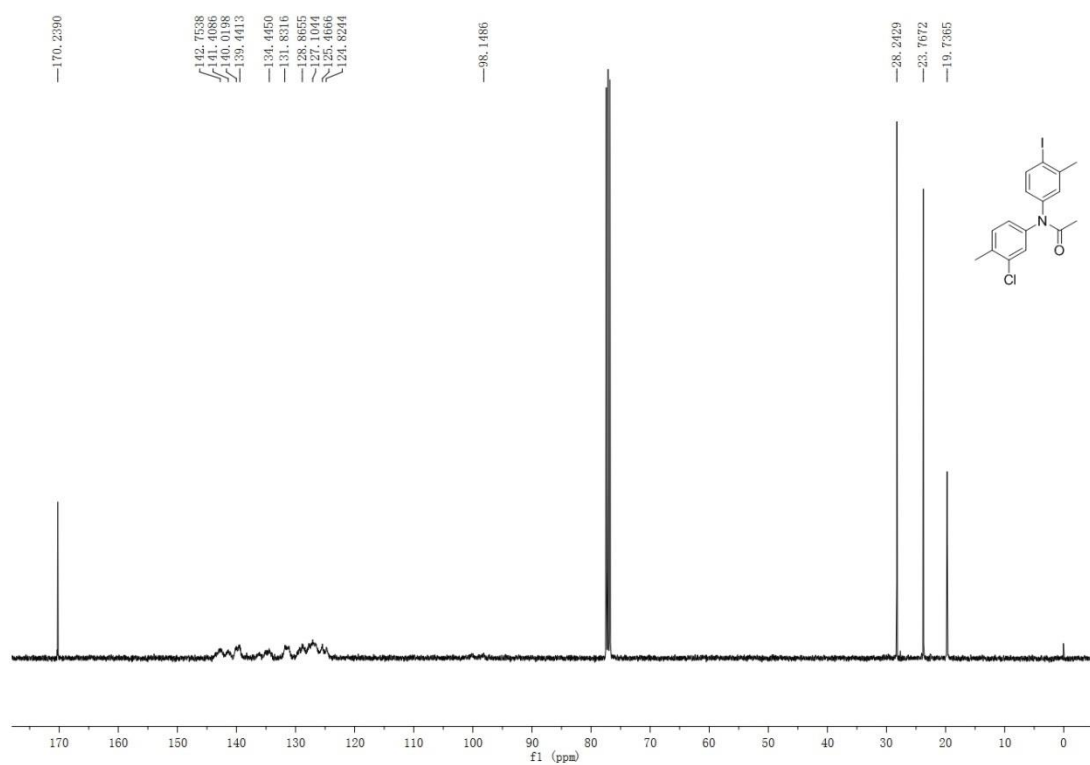

**N-(3-cyano-4-methylphenyl)-N-(4-iodo-3-methylphenyl)acetamide (3bj)**

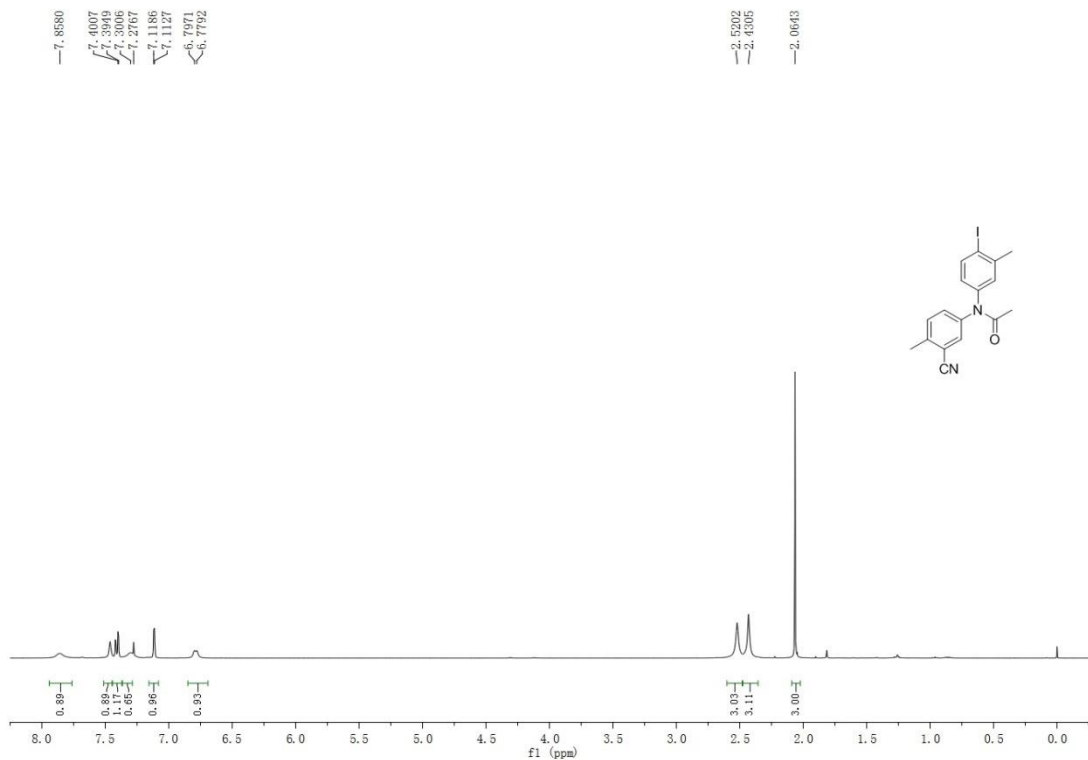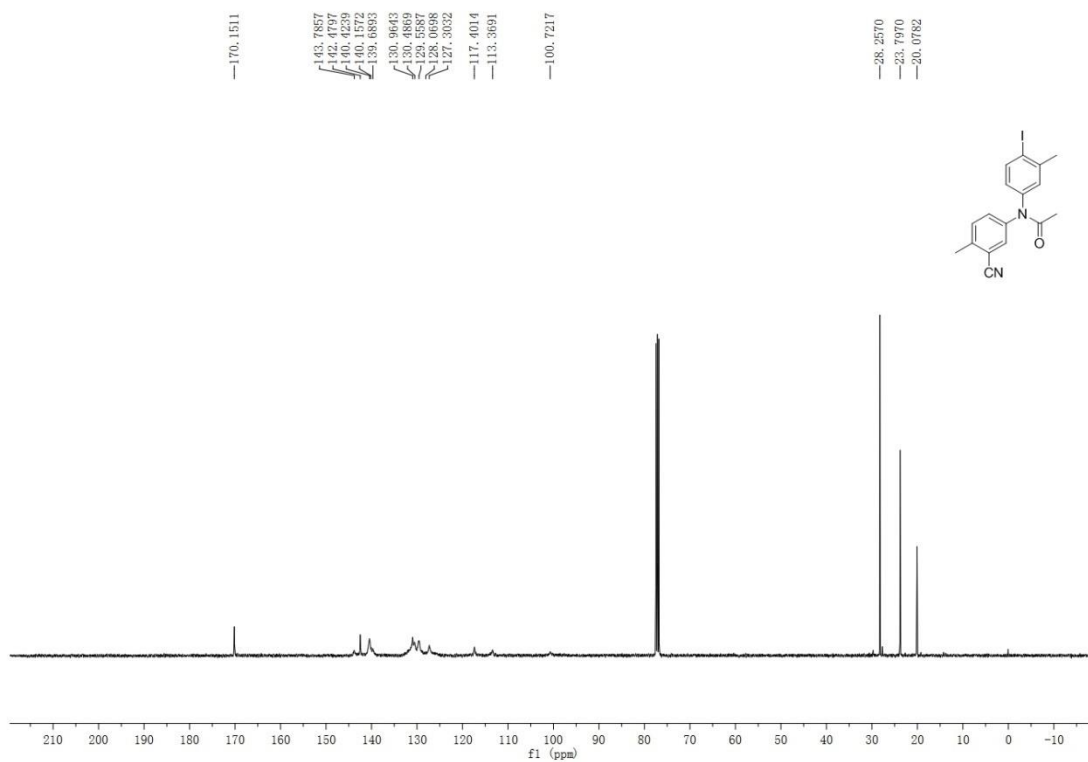



# N-(4-iodo-3-methylphenyl)-N-phenylpropionamide(3bk)

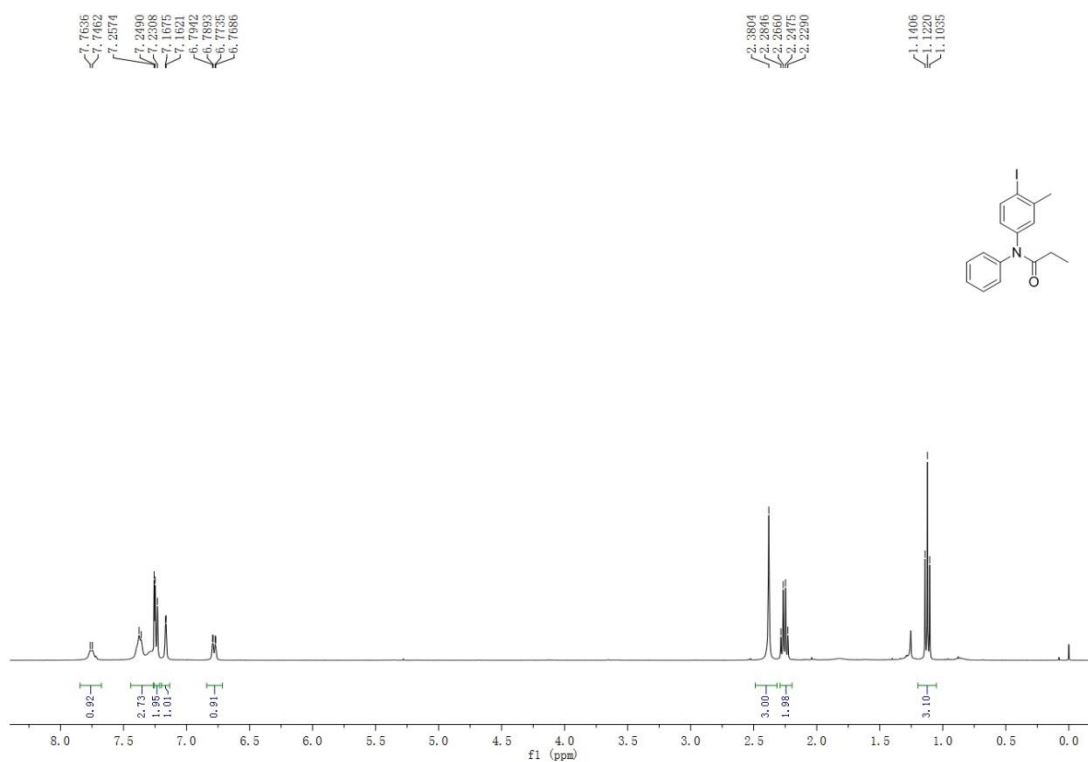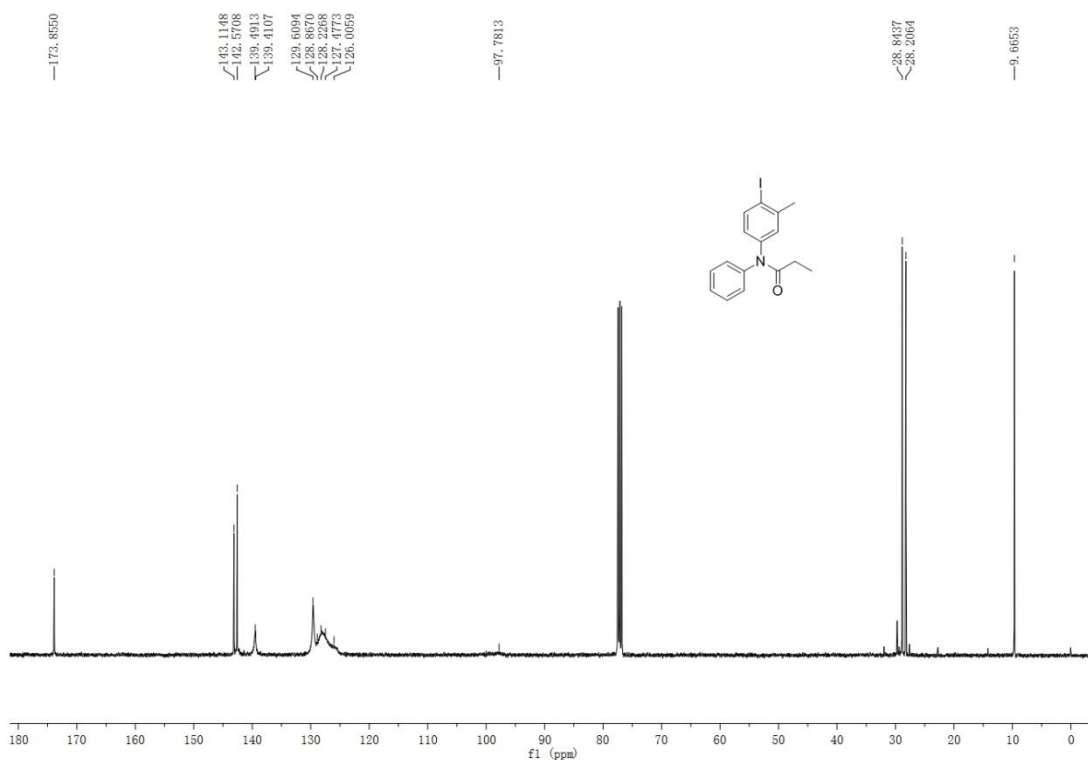

**N-(4-iodo-3-methylphenyl)-N-phenylbutyramide(3bl)**

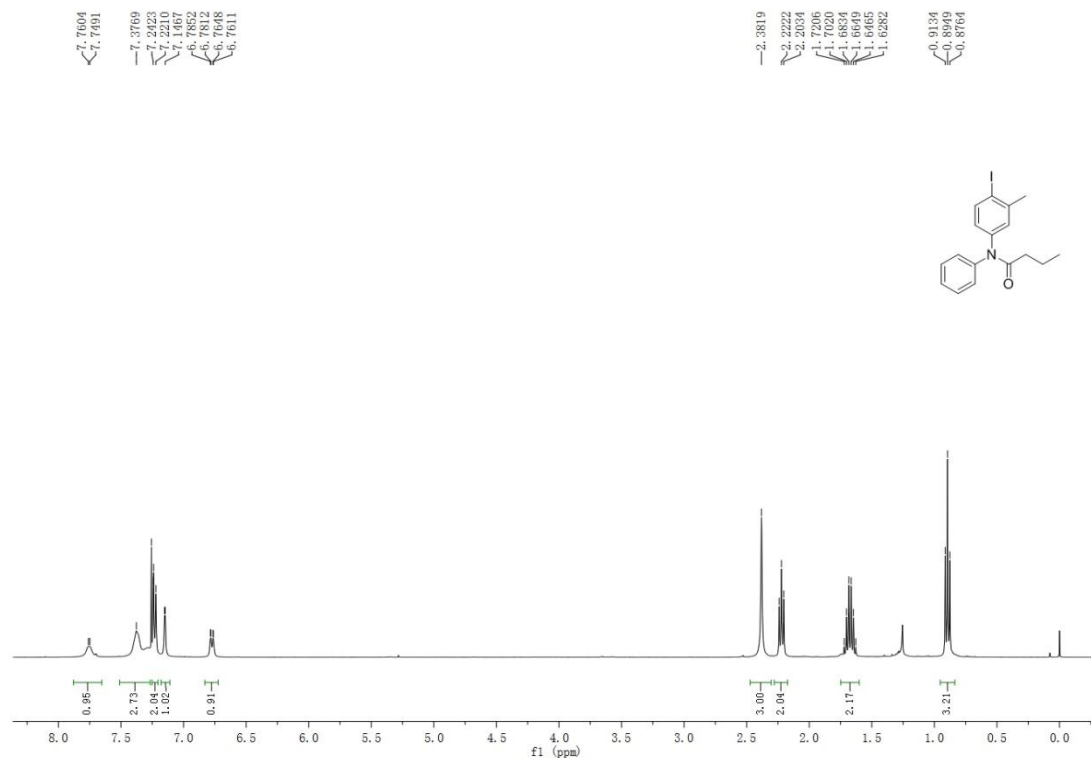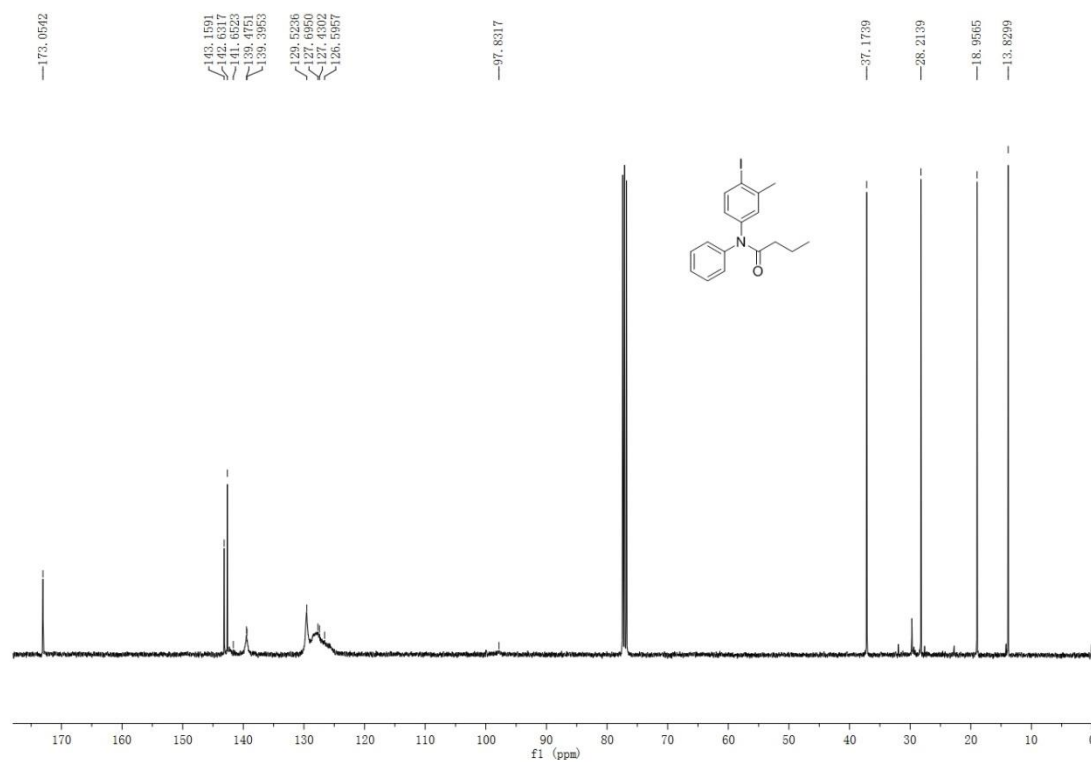

**N-(4-iodo-3-methylphenyl)-N-phenylisobutyramide(3bm)**

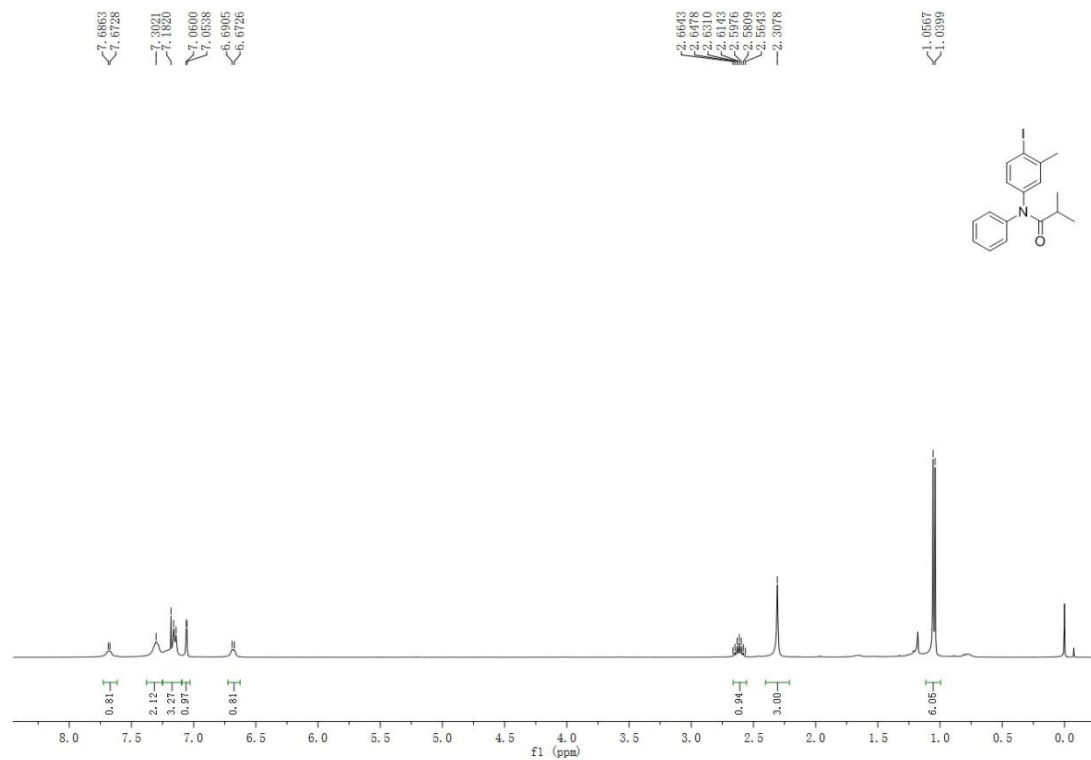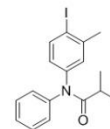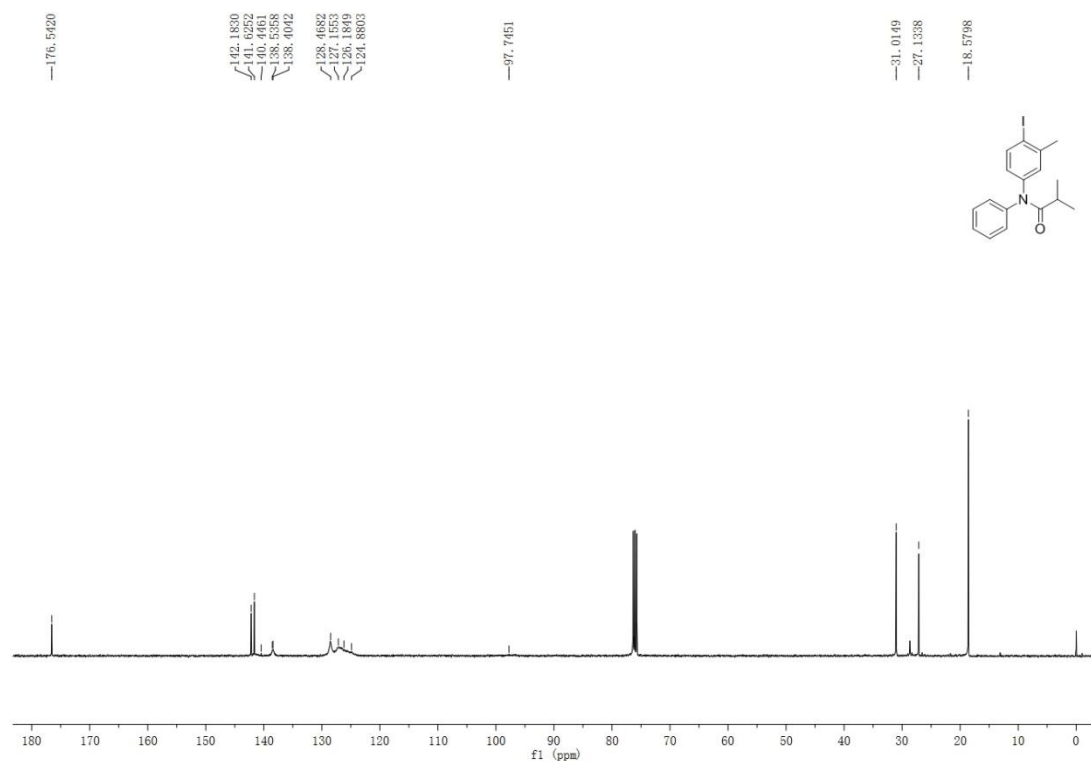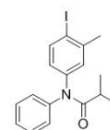

# N-(4-iodo-3-methylphenyl)-N-phenylcyclopropanecarboxamide(3bn)

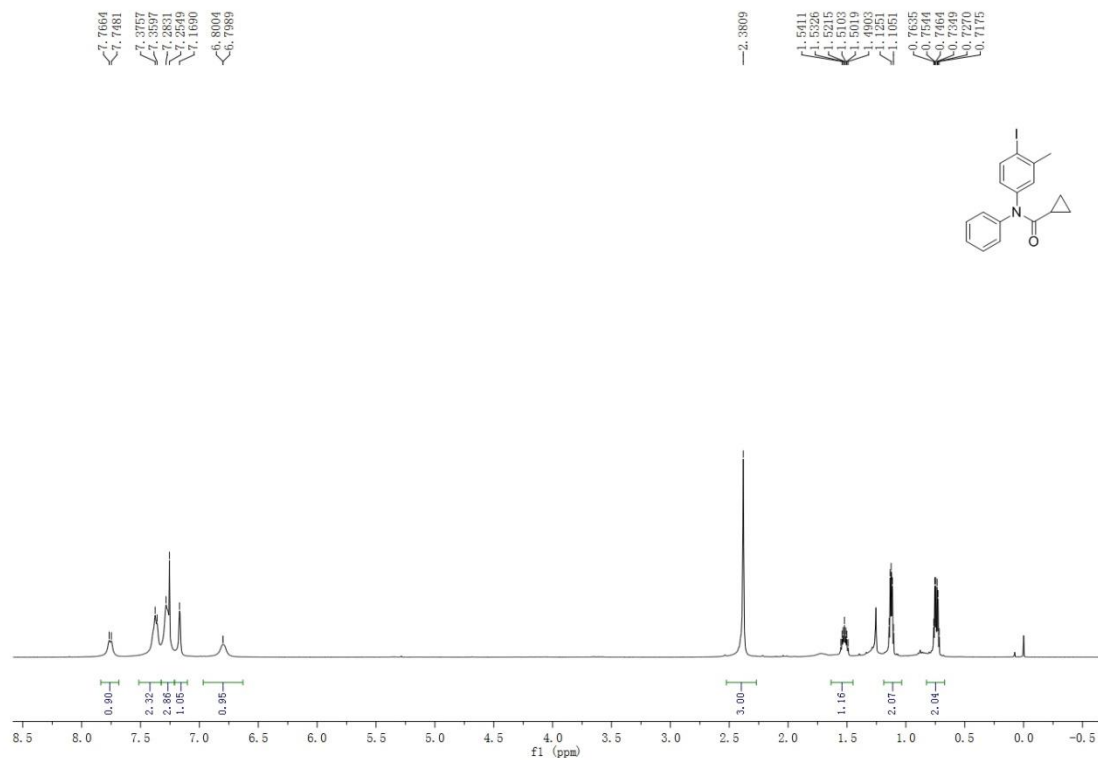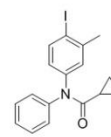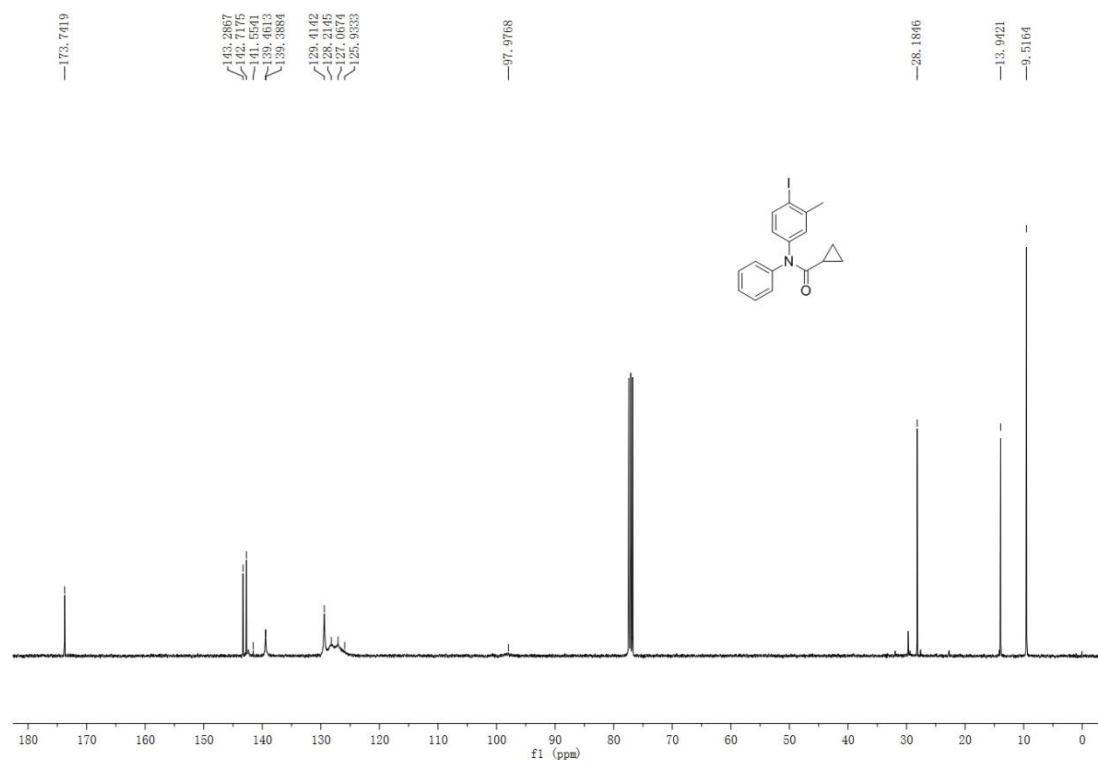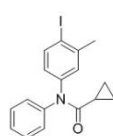

**N-(4-iodo-3-methylphenyl)-N-phenylcyclohexanecarboxamide(3bo)**

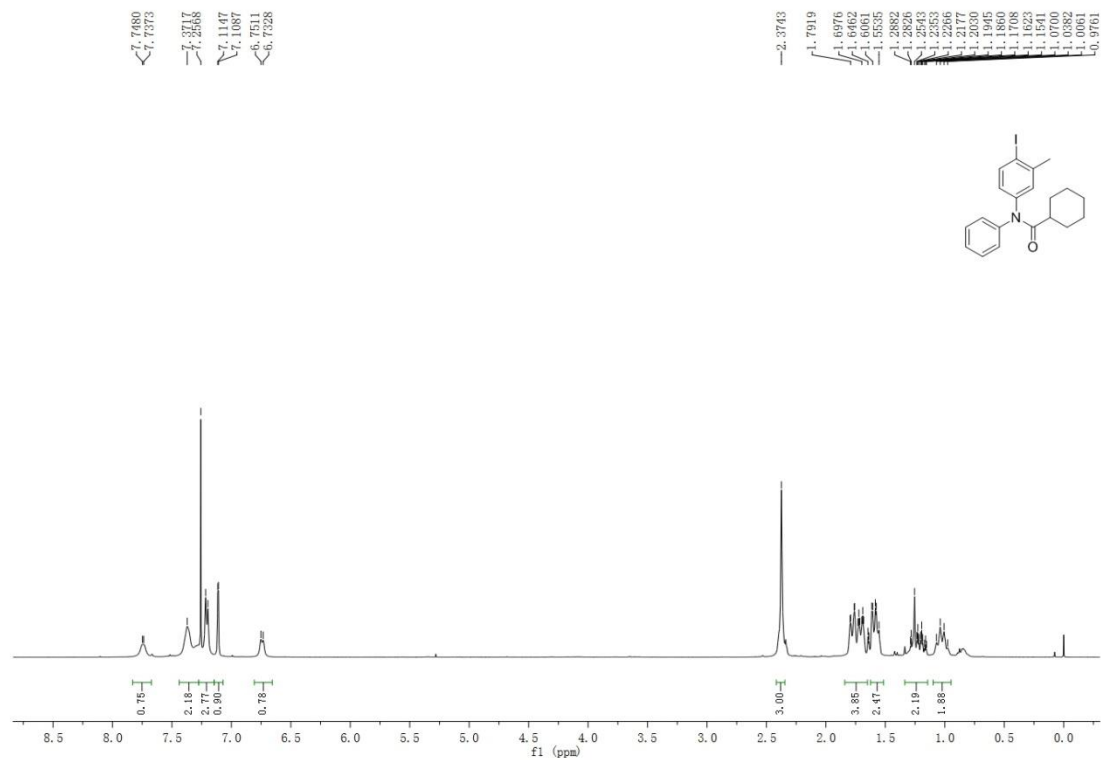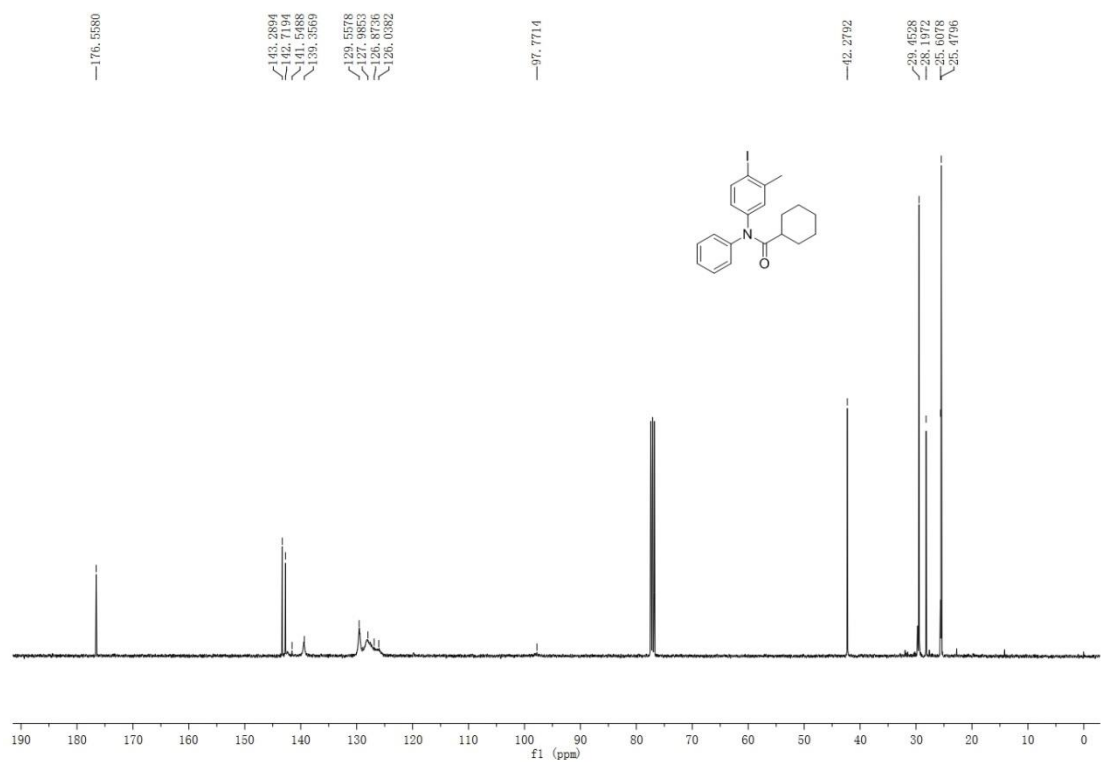

# N-(4-iodo-3-methylphenyl)-N-phenylbenzamide(3bp)

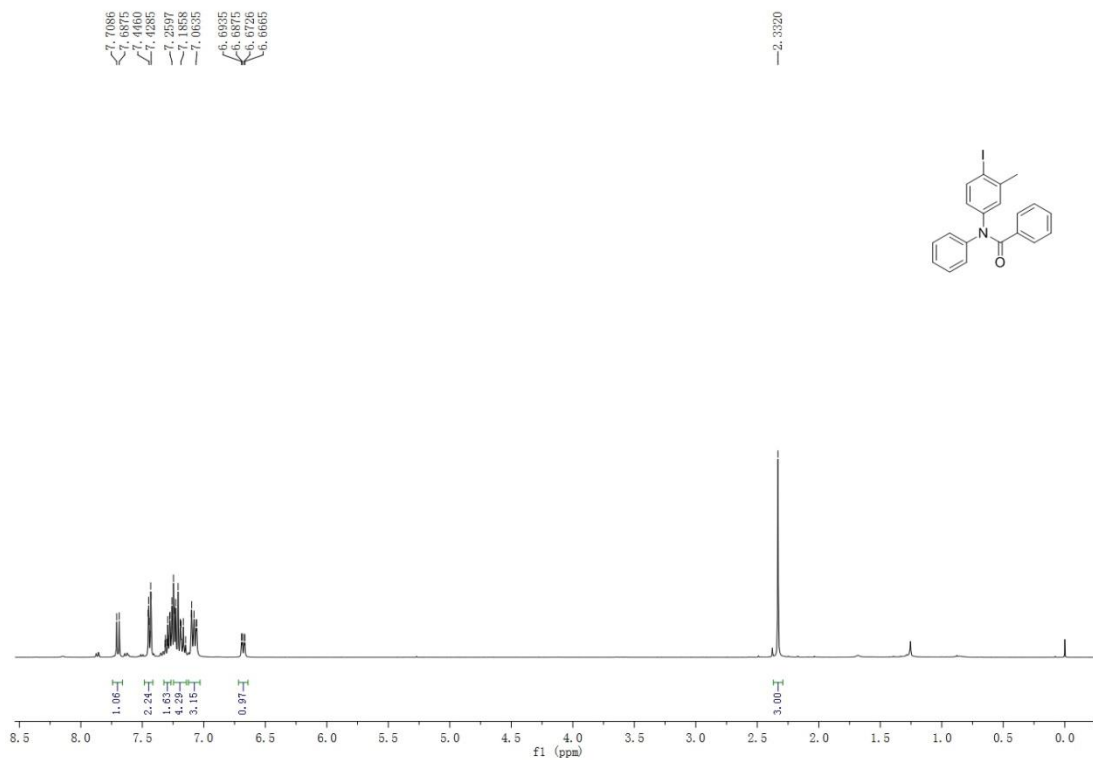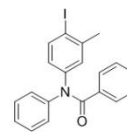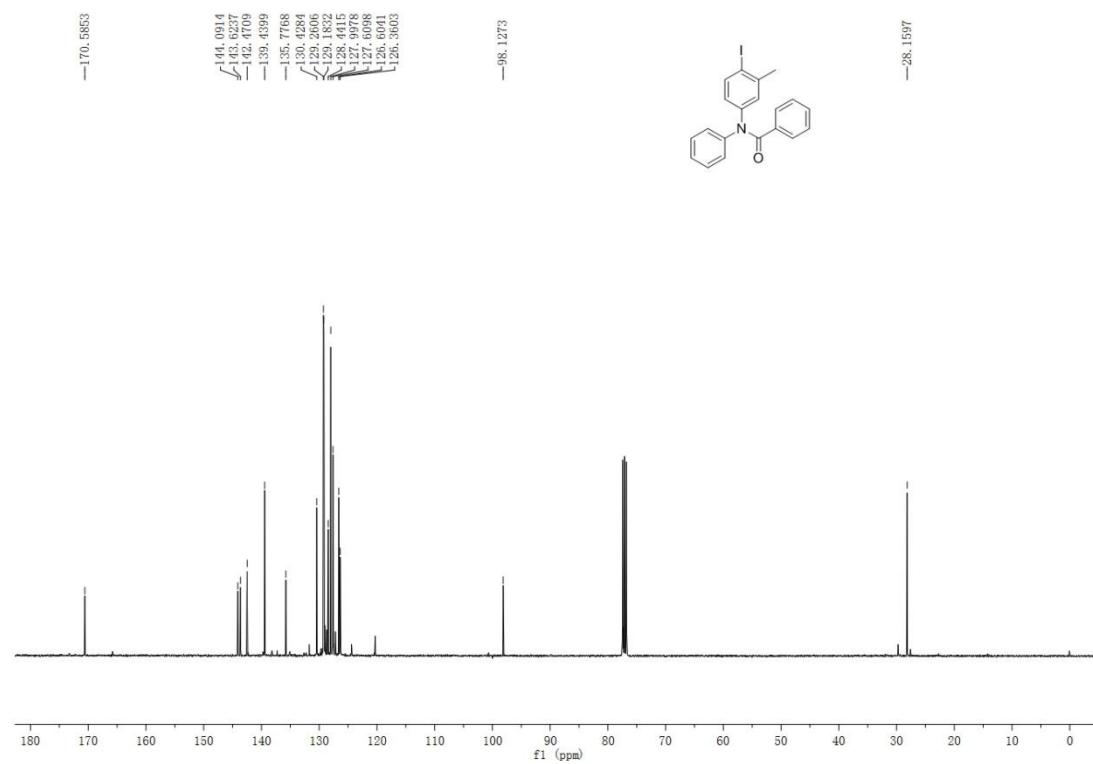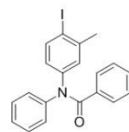

**N-(4-iodo-3-methylphenyl)-N-phenylacrylamide(3bq)**

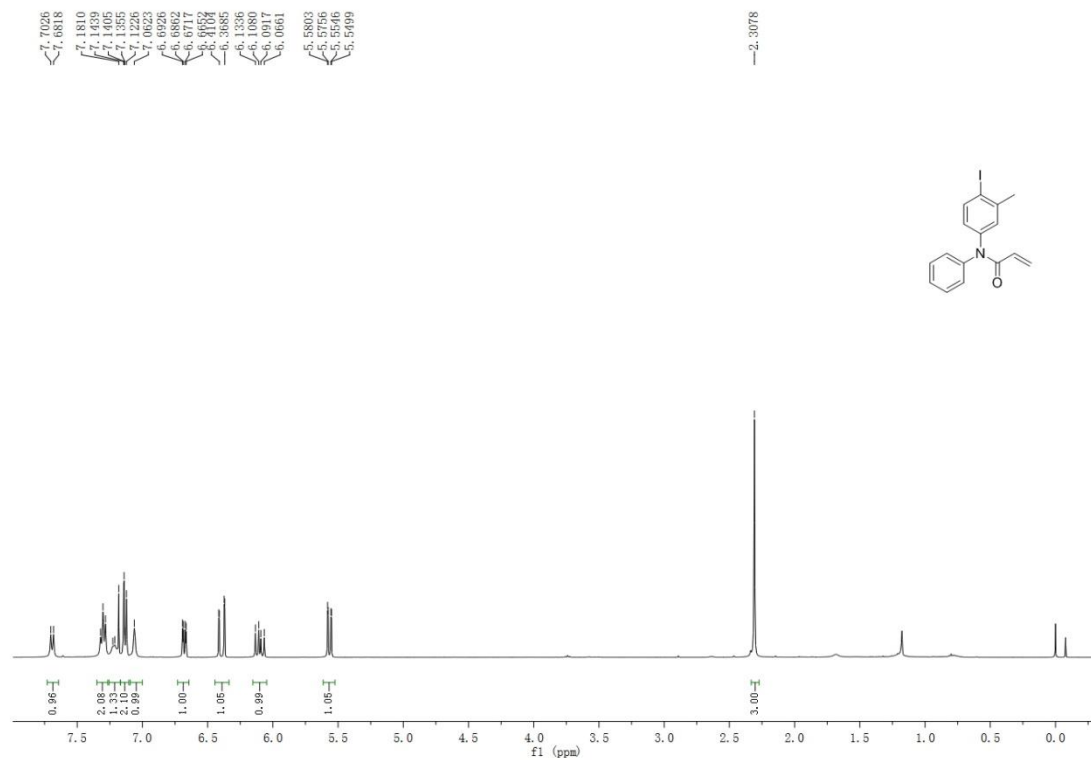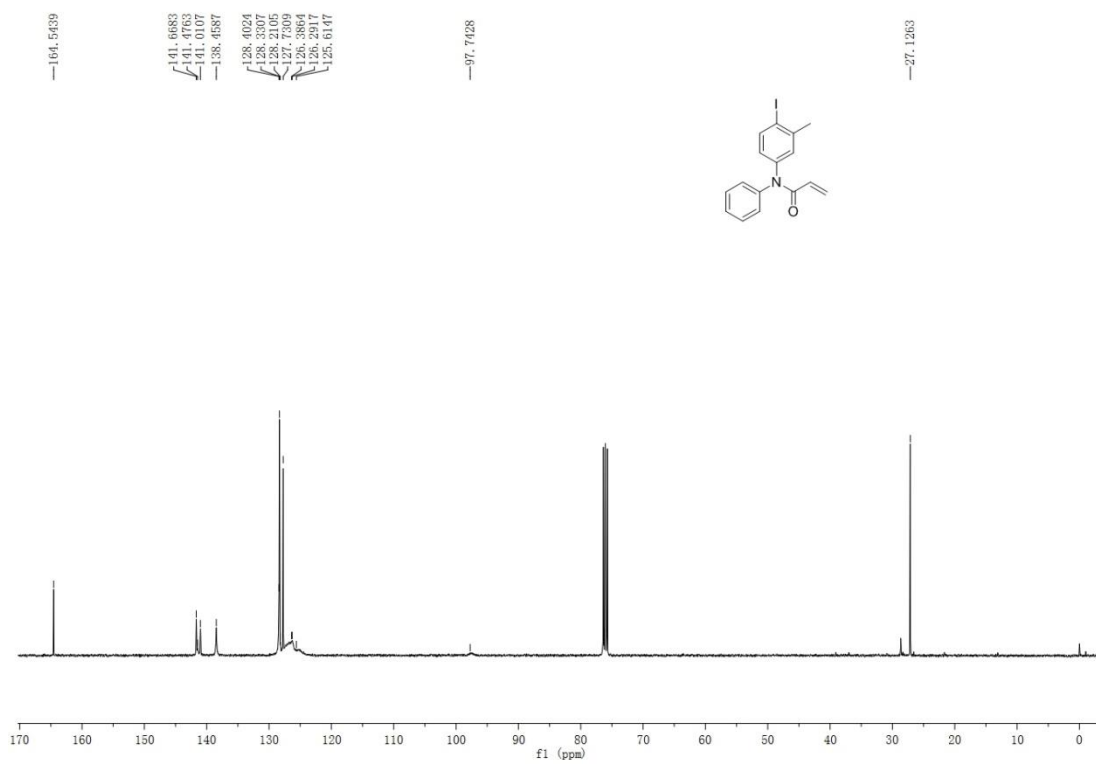

# N-(4-iodo-3-methylphenyl)-N-phenylbut-3-enamide(3br)

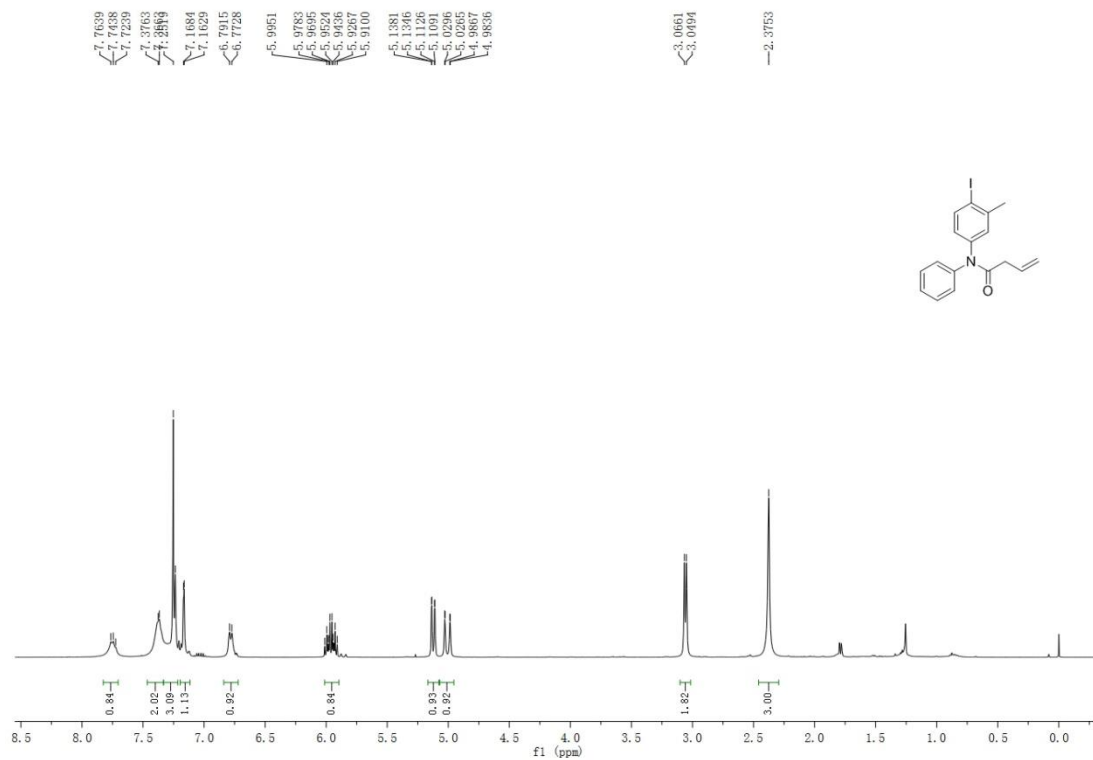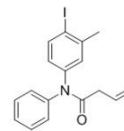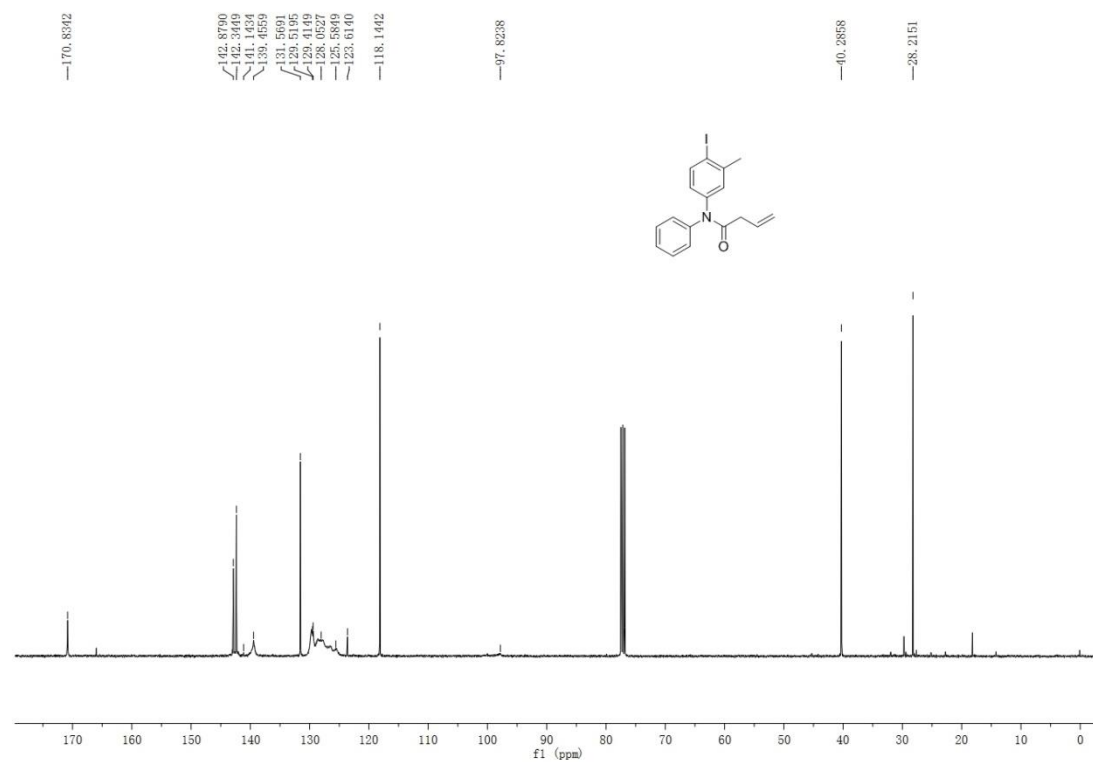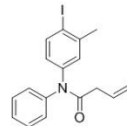



**N-(4-iodo-3-methylphenyl)-N-phenylcinnamamide(3bs)**

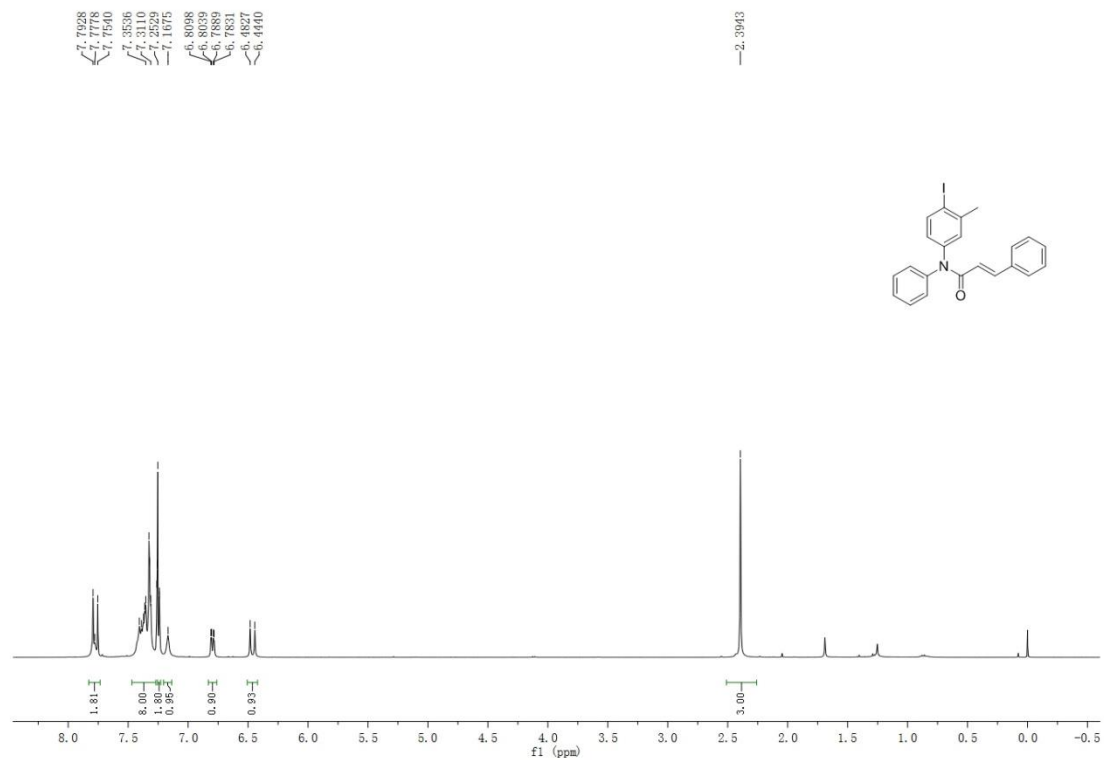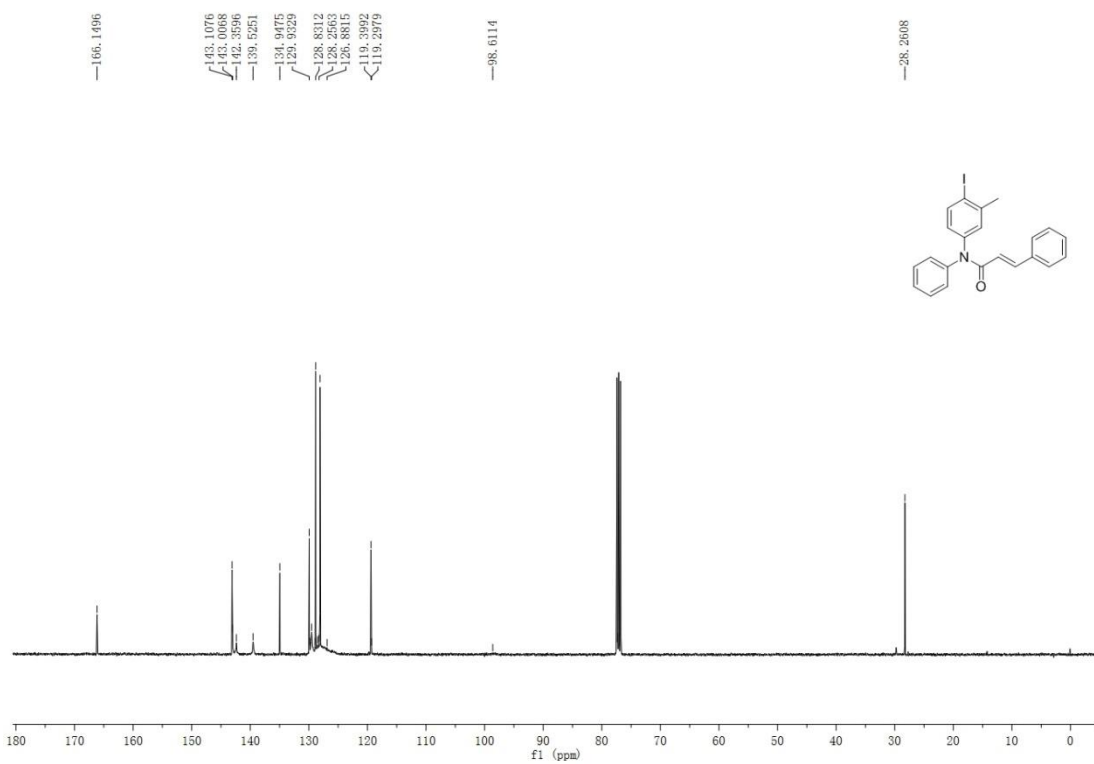

# 4-iodo-N-phenylaniline(4)

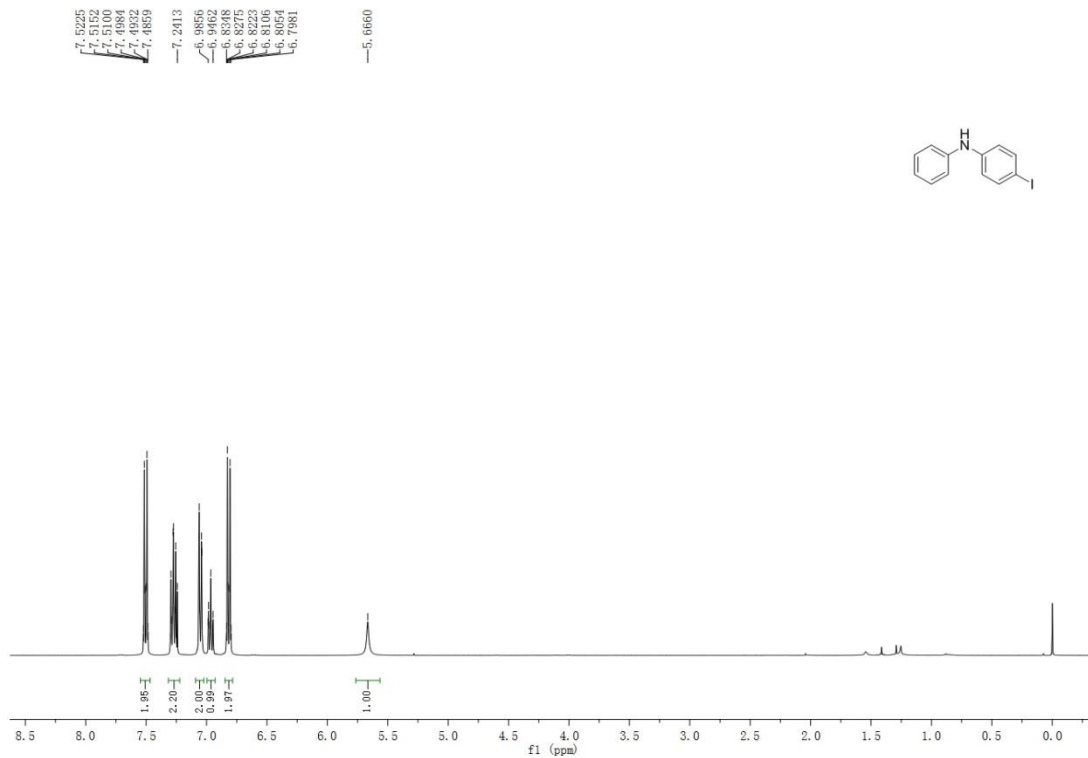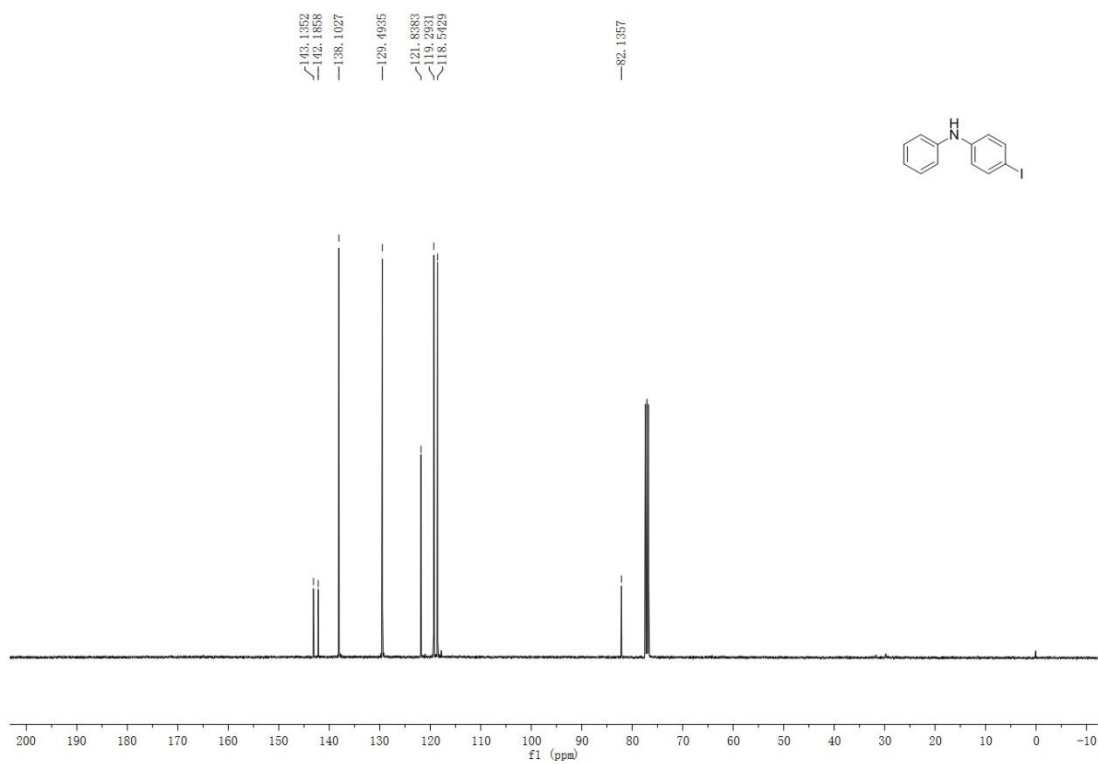

**(E)-N-phenyl-N-(4-styrylphenyl)acetamide(5)**

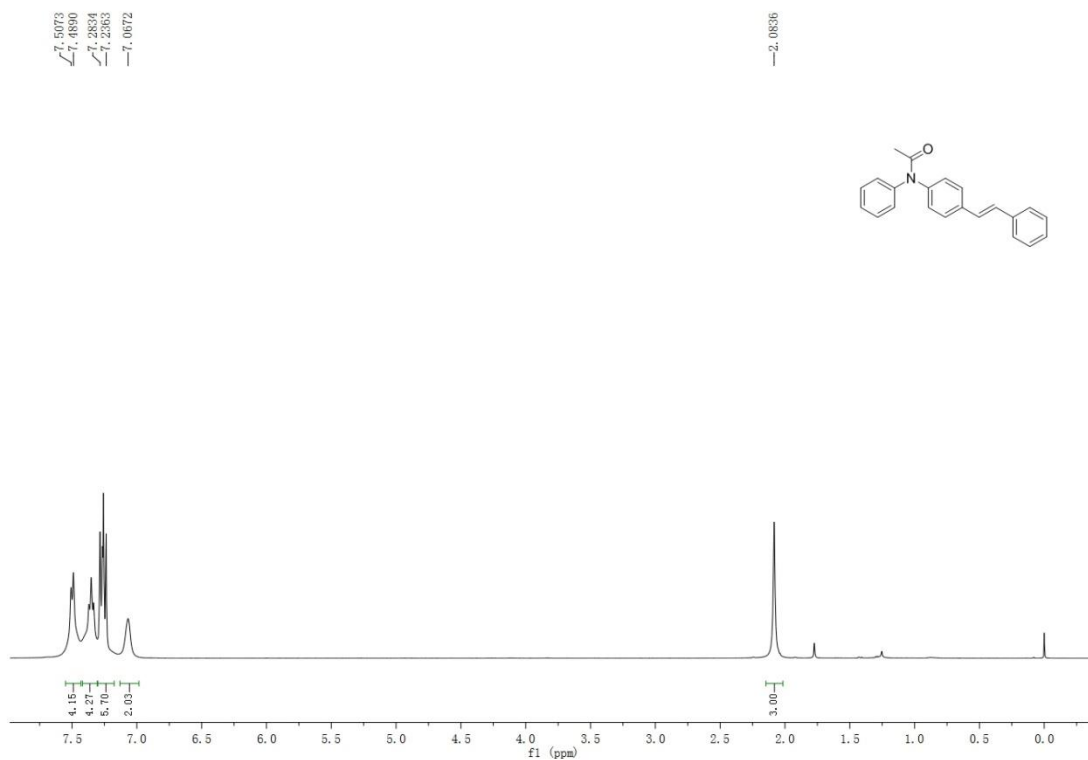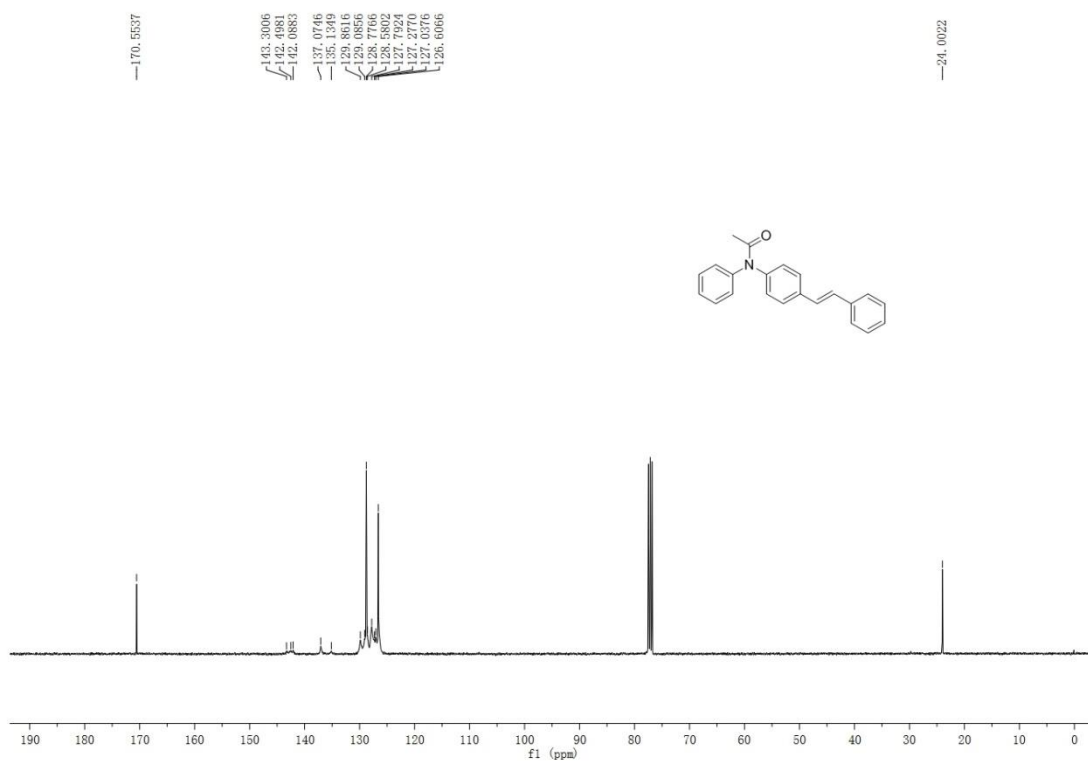

# N-([1,1'-biphenyl]-4-yl)-N-phenylacetamide(6)

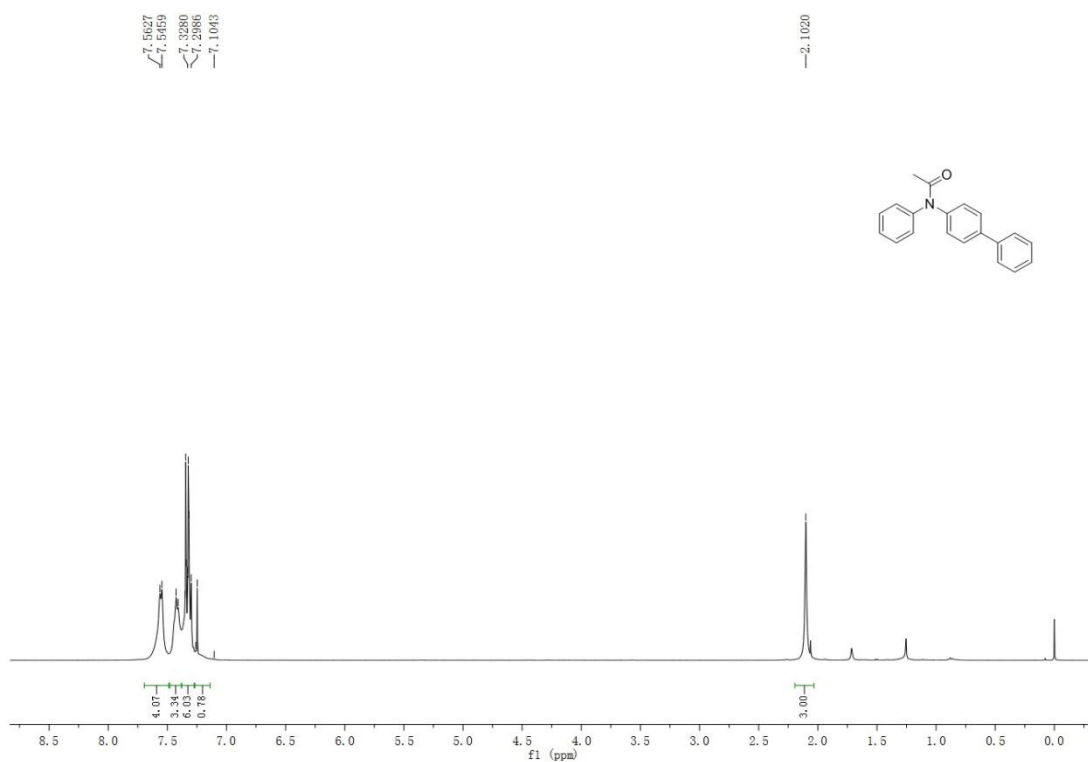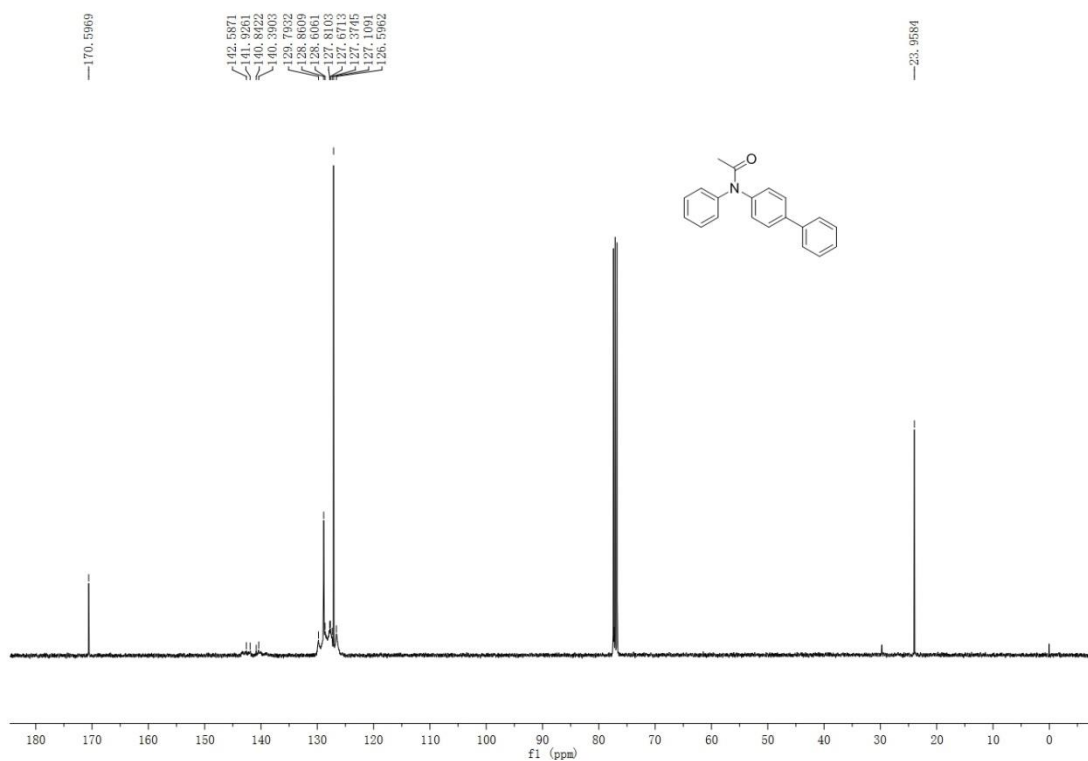

# N-phenyl-N-(4-(phenylethynyl)phenyl)acetamide(7)

7.5261  
7.5164  
7.5078  
7.4989  
7.3934  
7.3794  
7.3630  
7.3500  
7.3258  
7.2649  
7.2552  
7.2498  
7.2360  
7.2337  
7.2280  
7.2136  
7.2053

-2.0729

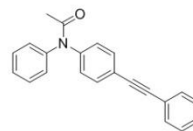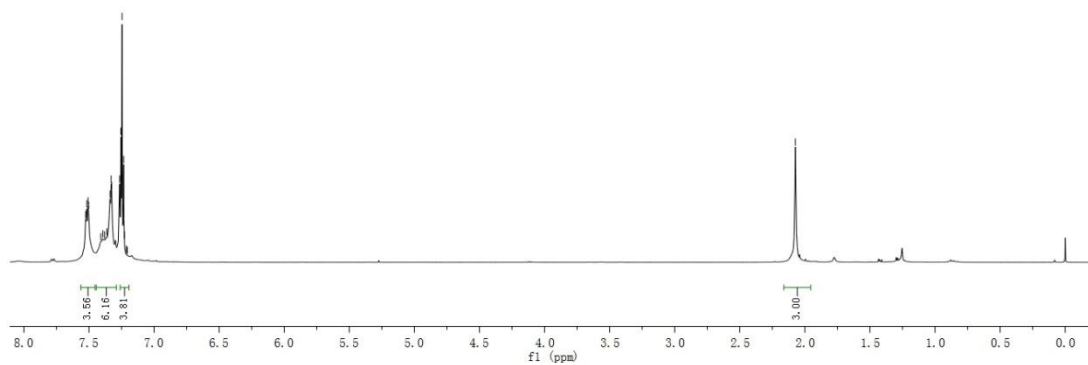

170.4488

142.7904  
132.2217  
131.6000  
131.5838  
128.9038  
128.7886  
128.5782  
128.4200  
126.5193  
125.9594  
123.0471

88.6927

24.0671

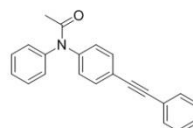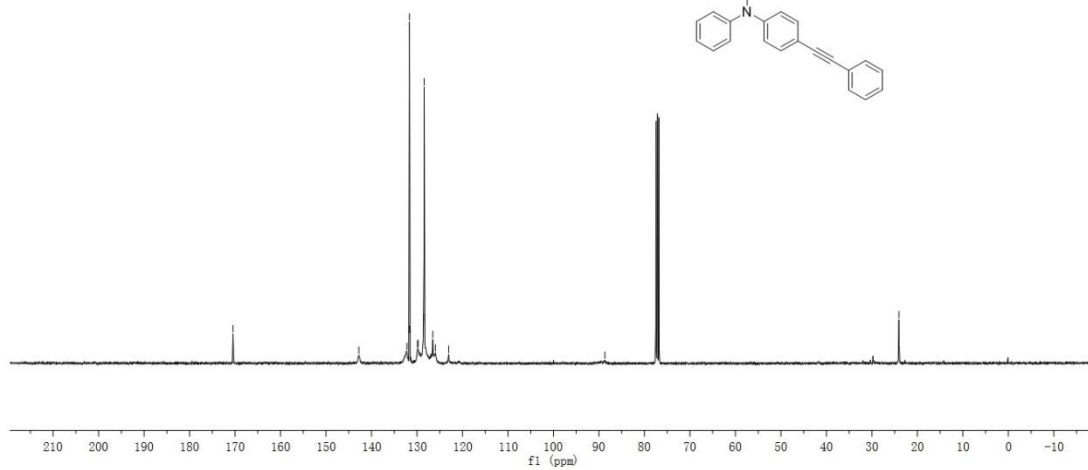

Supplement: d1qo00225b1.pdf [file d1qo00225b1.pdf]
